# Supplementary material
Source: PubMed Central journal article supplement (PMC6109843)
Supplement: jm8b00782_si_002.pdf [file jm8b00782_si_002.pdf]

## Supporting information

# Novel Quinazolinone Inhibitors of ALK2 Flip between Alternate Binding Modes: SAR, Structural Characterization, Kinase Profiling and Cellular Proof of Concept

Liam Hudson<sup>§</sup>, James Mui<sup>§</sup>, Santiago Vázquez<sup>†</sup>, Diana M. Carvalho<sup>§</sup>, Eleanor Williams<sup>‡</sup>, Chris Jones<sup>§</sup>, Alex N. Bullock<sup>‡</sup>, Swen Hoelder<sup>§\*</sup>

<sup>§</sup> Institute of Cancer Research, 15 Cotswold Road, Sutton, Surrey, SM2 5NG, United Kingdom

<sup>‡</sup> Structural Genomics Consortium, University of Oxford, Old Road Campus Research Building, Roosevelt Drive, Oxford OX3 7DQ, United Kingdom

<sup>†</sup> Laboratori de Química Farmacèutica (Unitat Associada al CSIC), Facultat de Farmàcia i Ciències de l'Alimentació, and Institute of Biomedicine (IBUB), Universitat de Barcelona, Av. Joan XXIII s/n, Barcelona E-08028, Spain

## Contents

|                                                      |            |
|------------------------------------------------------|------------|
| <b>1. 16 and 21 kinome selectivity data .....</b>    | <b>S2</b>  |
| <b>2. Crystallographic data .....</b>                | <b>S9</b>  |
| <b>3. Experimental procedures .....</b>              | <b>S10</b> |
| <b>3.1. Co-crystal Structure Determination .....</b> | <b>S10</b> |
| <b>3.2. Cell culture .....</b>                       | <b>S10</b> |
| <b>3.3. Western blot analysis .....</b>              | <b>S11</b> |
| <b>3.4. LCMS method details .....</b>                | <b>S12</b> |
| <b>3.5. Preparative HPLC method details .....</b>    | <b>S12</b> |
| <b>4. NMR .....</b>                                  | <b>S14</b> |
| <b>5. References .....</b>                           | <b>S70</b> |

## 1. 16 and 21 kinome selectivity data

**Table S1:** DiscoverX selectivity data for compounds **16** and **21**

(P – phosphorylated; nP – nonphosphorylated; % Ctrl values show the % of DNA-tagged kinase which was not displaced from a solid supported ligand by a test compound relative to untreated control, quantified by qPCR).

**Please note:** ALKs 1, 2, 3, 4, 5 and 6 are listed by their gene symbols: ACVRL1 (ALK1), ACVR1 (ALK2), BMPR1A (ALK3), ACVR1B (ALK4), TGFBR1 (ALK5) and BMPR1B (ALK6)

| Cmpd      | DiscoverX Gene Symbol | Entrez Gene Symbol | % Ctrl | Cmpd Conc (nM) |
|-----------|-----------------------|--------------------|--------|----------------|
| <b>16</b> | KIT                   | KIT                | 1.8    | 1000           |
|           | BMPR1B                | BMPR1B             | 4.1    | 1000           |
|           | PDGFRA                | PDGFRA             | 8.7    | 1000           |
|           | ACVR1                 | ACVR1              | 17     | 1000           |
|           | PDGFRB                | PDGFRB             | 20     | 1000           |
|           | ACVRL1                | ACVRL1             | 44     | 1000           |
|           | MINK                  | MINK1              | 51     | 1000           |
|           | PAK2                  | PAK2               | 54     | 1000           |
|           | BRAF(V600E)           | BRAF               | 58     | 1000           |
|           | EGFR(L858R)           | EGFR               | 63     | 1000           |
|           | BMPR2                 | BMPR2              | 64     | 1000           |
|           | BRAF                  | BRAF               | 65     | 1000           |
|           | CDK11                 | CDK19              | 68     | 1000           |
|           | CSNK1D                | CSNK1D             | 68     | 1000           |
|           | EGFR                  | EGFR               | 71     | 1000           |
|           | PAK1                  | PAK1               | 71     | 1000           |
|           | ABL1-nP               | ABL1               | 76     | 1000           |
|           | TRKA                  | NTRK1              | 76     | 1000           |
|           | ABL1-P                | ABL1               | 77     | 1000           |
|           | BMPR1A                | BMPR1A             | 77     | 1000           |
| TNK1      | TNK1                  | 78                 | 1000   |                |
| SRPK3     | SRPK3                 | 79                 | 1000   |                |
| MET       | MET                   | 80                 | 1000   |                |

|                 |         |    |      |
|-----------------|---------|----|------|
| FLT3            | FLT3    | 83 | 1000 |
| ABL1(E255K)-P   | ABL1    | 84 | 1000 |
| IKK-beta        | IKBKB   | 84 | 1000 |
| PDPK1           | PDPK1   | 84 | 1000 |
| MEK2            | MAP2K2  | 85 | 1000 |
| AKT2            | AKT2    | 86 | 1000 |
| IKK-alpha       | CHUK    | 86 | 1000 |
| PLK1            | PLK1    | 86 | 1000 |
| YANK3           | STK32C  | 86 | 1000 |
| PCTK1           | CDK16   | 87 | 1000 |
| RAF1            | RAF1    | 88 | 1000 |
| RIPK2           | RIPK2   | 88 | 1000 |
| SRC             | SRC     | 88 | 1000 |
| MEK1            | MAP2K1  | 89 | 1000 |
| PIM2            | PIM2    | 89 | 1000 |
| PKAC-alpha      | PRKACA  | 89 | 1000 |
| CSNK1G2         | CSNK1G2 | 90 | 1000 |
| DYRK1B          | DYRK1B  | 90 | 1000 |
| MARK3           | MARK3   | 90 | 1000 |
| PLK3            | PLK3    | 90 | 1000 |
| CSF1R           | CSF1R   | 91 | 1000 |
| DCAMKL1         | DCLK1   | 92 | 1000 |
| MKNK1           | MKNK1   | 92 | 1000 |
| PIM1            | PIM1    | 92 | 1000 |
| PRKCE           | PRKCE   | 92 | 1000 |
| RET             | RET     | 92 | 1000 |
| TYK2(JH1domain) | TYK2    | 92 | 1000 |
| ULK2            | ULK2    | 93 | 1000 |
| AKT1            | AKT1    | 94 | 1000 |
| CDK9            | CDK9    | 94 | 1000 |
| CDK2            | CDK2    | 95 | 1000 |
| GSK3B           | GSK3B   | 95 | 1000 |
| VEGFR2          | KDR     | 95 | 1000 |
| AXL             | AXL     | 96 | 1000 |
| LKB1            | STK11   | 96 | 1000 |

|                 |          |     |      |
|-----------------|----------|-----|------|
| MAPKAPK2        | MAPKAPK2 | 96  | 1000 |
| SIK2            | SIK2     | 96  | 1000 |
| TGFBR1          | TGFBR1   | 96  | 1000 |
| ABL2            | ABL2     | 97  | 1000 |
| AURKB           | AURKB    | 97  | 1000 |
| CDK7            | CDK7     | 97  | 1000 |
| ERK1            | MAPK3    | 97  | 1000 |
| FAK             | PTK2     | 97  | 1000 |
| MLK1            | MAP3K9   | 97  | 1000 |
| NEK7            | NEK7     | 97  | 1000 |
| PAK4            | PAK4     | 97  | 1000 |
| ACVR2B          | ACVR2B   | 98  | 1000 |
| JAK3(JH1domain) | JAK3     | 98  | 1000 |
| JNK3            | MAPK10   | 98  | 1000 |
| LCK             | LCK      | 98  | 1000 |
| ALK             | ALK      | 99  | 1000 |
| BTK             | BTK      | 99  | 1000 |
| JAK2(JH1domain) | JAK2     | 99  | 1000 |
| TIE2            | TEK      | 99  | 1000 |
| ABL1(T315I)-P   | ABL1     | 100 | 1000 |
| ACVR1B          | ACVR1B   | 100 | 1000 |
| ACVR2A          | ACVR2A   | 100 | 1000 |
| ADCK3           | CABC1    | 100 | 1000 |
| AURKA           | AURKA    | 100 | 1000 |
| CDK3            | CDK3     | 100 | 1000 |
| CHEK1           | CHEK1    | 100 | 1000 |
| EPHA2           | EPHA2    | 100 | 1000 |
| ERBB2           | ERBB2    | 100 | 1000 |
| ERBB4           | ERBB4    | 100 | 1000 |
| FGFR2           | FGFR2    | 100 | 1000 |
| FGFR3           | FGFR3    | 100 | 1000 |
| FYN             | FYN      | 100 | 1000 |
| IGF1R           | IGF1R    | 100 | 1000 |
| INSR            | INSR     | 100 | 1000 |
| JNK1            | MAPK8    | 100 | 1000 |

|           |                            |         |     |      |
|-----------|----------------------------|---------|-----|------|
|           | JNK2                       | MAPK9   | 100 | 1000 |
|           | KIT(D816H)                 | KIT     | 100 | 1000 |
|           | KIT(V559D,T670I)           | KIT     | 100 | 1000 |
|           | MAP3K4                     | MAP3K4  | 100 | 1000 |
|           | MKNK2                      | MKNK2   | 100 | 1000 |
|           | NEK6                       | NEK6    | 100 | 1000 |
|           | p38-alpha                  | MAPK14  | 100 | 1000 |
|           | p38-beta                   | MAPK11  | 100 | 1000 |
|           | PIK3C2B                    | PIK3C2B | 100 | 1000 |
|           | PIK3CA                     | PIK3CA  | 100 | 1000 |
|           | PIK3CG                     | PIK3CG  | 100 | 1000 |
|           | PIM3                       | PIM3    | 100 | 1000 |
|           | PLK4                       | PLK4    | 100 | 1000 |
|           | RIOK2                      | RIOK2   | 100 | 1000 |
|           | ROCK2                      | ROCK2   | 100 | 1000 |
|           | RSK2(Kin.Dom.1-N-terminal) | RPS6KA3 | 100 | 1000 |
|           | SNARK                      | NUAK2   | 100 | 1000 |
|           | TSSK1B                     | TSSK1B  | 100 | 1000 |
|           | ZAP70                      | ZAP70   | 100 | 1000 |
| <b>21</b> | BMPR1B                     | BMPR1B  | 1.6 | 1000 |
|           | ACVR1                      | ACVR1   | 5.5 | 1000 |
|           | BRAF(V600E)                | BRAF    | 11  | 1000 |
|           | ACVRL1                     | ACVRL1  | 16  | 1000 |
|           | BRAF                       | BRAF    | 17  | 1000 |
|           | ACVR1B                     | ACVR1B  | 18  | 1000 |
|           | RAF1                       | RAF1    | 25  | 1000 |
|           | TGFBR1                     | TGFBR1  | 30  | 1000 |
|           | PIM1                       | PIM1    | 60  | 1000 |
|           | PAK4                       | PAK4    | 62  | 1000 |
|           | BMPR1A                     | BMPR1A  | 65  | 1000 |
|           | ACVR2B                     | ACVR2B  | 67  | 1000 |
|           | RIPK2                      | RIPK2   | 68  | 1000 |
|           | JAK2(JH1domain)            | JAK2    | 75  | 1000 |
|           | PLK1                       | PLK1    | 75  | 1000 |
|           | BMPR2                      | BMPR2   | 76  | 1000 |

|            |         |    |      |
|------------|---------|----|------|
| PAK2       | PAK2    | 77 | 1000 |
| ULK2       | ULK2    | 77 | 1000 |
| JNK3       | MAPK10  | 79 | 1000 |
| MEK2       | MAP2K2  | 79 | 1000 |
| PDGFRB     | PDGFRB  | 81 | 1000 |
| ACVR2A     | ACVR2A  | 83 | 1000 |
| MARK3      | MARK3   | 83 | 1000 |
| MEK1       | MAP2K1  | 85 | 1000 |
| DCAMKL1    | DCLK1   | 87 | 1000 |
| CSNK1D     | CSNK1D  | 88 | 1000 |
| MET        | MET     | 88 | 1000 |
| MINK       | MINK1   | 89 | 1000 |
| TIE2       | TEK     | 89 | 1000 |
| CDK11      | CDK19   | 90 | 1000 |
| KIT(D816H) | KIT     | 90 | 1000 |
| MAP3K4     | MAP3K4  | 90 | 1000 |
| p38-alpha  | MAPK14  | 90 | 1000 |
| TNK1       | TNK1    | 90 | 1000 |
| ABL1-nP    | ABL1    | 91 | 1000 |
| JNK1       | MAPK8   | 91 | 1000 |
| JNK2       | MAPK9   | 91 | 1000 |
| MLK1       | MAP3K9  | 91 | 1000 |
| PRKCE      | PRKCE   | 91 | 1000 |
| CSNK1G2    | CSNK1G2 | 92 | 1000 |
| DYRK1B     | DYRK1B  | 92 | 1000 |
| FLT3       | FLT3    | 92 | 1000 |
| MKNK2      | MKNK2   | 92 | 1000 |
| ABL2       | ABL2    | 93 | 1000 |
| AKT2       | AKT2    | 93 | 1000 |
| INSR       | INSR    | 93 | 1000 |
| MKNK1      | MKNK1   | 93 | 1000 |
| PDGFRA     | PDGFRA  | 93 | 1000 |
| TRKA       | NTRK1   | 93 | 1000 |
| AURKB      | AURKB   | 94 | 1000 |
| CDK3       | CDK3    | 94 | 1000 |

|                            |         |    |      |
|----------------------------|---------|----|------|
| IGF1R                      | IGF1R   | 94 | 1000 |
| JAK3(JH1domain)            | JAK3    | 94 | 1000 |
| PCTK1                      | CDK16   | 94 | 1000 |
| ABL1(E255K)-P              | ABL1    | 95 | 1000 |
| CSF1R                      | CSF1R   | 95 | 1000 |
| IKK-beta                   | IKBKB   | 95 | 1000 |
| PDPK1                      | PDPK1   | 95 | 1000 |
| TYK2(JH1domain)            | TYK2    | 95 | 1000 |
| YANK3                      | STK32C  | 95 | 1000 |
| LCK                        | LCK     | 96 | 1000 |
| PAK1                       | PAK1    | 96 | 1000 |
| PIM2                       | PIM2    | 96 | 1000 |
| PLK3                       | PLK3    | 96 | 1000 |
| SRPK3                      | SRPK3   | 96 | 1000 |
| ABL1(T315I)-P              | ABL1    | 97 | 1000 |
| ABL1-P                     | ABL1    | 97 | 1000 |
| ADCK3                      | CABC1   | 97 | 1000 |
| GSK3B                      | GSK3B   | 97 | 1000 |
| KIT                        | KIT     | 97 | 1000 |
| RIOK2                      | RIOK2   | 97 | 1000 |
| RSK2(Kin.Dom.1-N-terminal) | RPS6KA3 | 97 | 1000 |
| AXL                        | AXL     | 98 | 1000 |
| EGFR                       | EGFR    | 98 | 1000 |
| EGFR(L858R)                | EGFR    | 98 | 1000 |
| ERK1                       | MAPK3   | 98 | 1000 |
| FAK                        | PTK2    | 98 | 1000 |
| KIT(V559D,T670I)           | KIT     | 98 | 1000 |
| PIK3C2B                    | PIK3C2B | 98 | 1000 |
| PIK3CG                     | PIK3CG  | 98 | 1000 |
| PIM3                       | PIM3    | 98 | 1000 |
| SRC                        | SRC     | 98 | 1000 |
| p38-beta                   | MAPK11  | 99 | 1000 |
| RET                        | RET     | 99 | 1000 |
| VEGFR2                     | KDR     | 99 | 1000 |
| ZAP70                      | ZAP70   | 99 | 1000 |

|            |          |     |      |
|------------|----------|-----|------|
| AKT1       | AKT1     | 100 | 1000 |
| ALK        | ALK      | 100 | 1000 |
| AURKA      | AURKA    | 100 | 1000 |
| BTK        | BTK      | 100 | 1000 |
| CDK2       | CDK2     | 100 | 1000 |
| CDK7       | CDK7     | 100 | 1000 |
| CDK9       | CDK9     | 100 | 1000 |
| CHEK1      | CHEK1    | 100 | 1000 |
| EPHA2      | EPHA2    | 100 | 1000 |
| ERBB2      | ERBB2    | 100 | 1000 |
| ERBB4      | ERBB4    | 100 | 1000 |
| FGFR2      | FGFR2    | 100 | 1000 |
| FGFR3      | FGFR3    | 100 | 1000 |
| FYN        | FYN      | 100 | 1000 |
| IKK-alpha  | CHUK     | 100 | 1000 |
| LKB1       | STK11    | 100 | 1000 |
| MAPKAPK2   | MAPKAPK2 | 100 | 1000 |
| NEK6       | NEK6     | 100 | 1000 |
| NEK7       | NEK7     | 100 | 1000 |
| PIK3CA     | PIK3CA   | 100 | 1000 |
| PKAC-alpha | PRKACA   | 100 | 1000 |
| PLK4       | PLK4     | 100 | 1000 |
| ROCK2      | ROCK2    | 100 | 1000 |
| SIK2       | SIK2     | 100 | 1000 |
| SNARK      | NUAK2    | 100 | 1000 |
| TSSK1B     | TSSK1B   | 100 | 1000 |



## 2. Crystallographic data

**Table S2: Crystallographic table for the structures of 11, 16 and 21.**

|                                 | <b>5-Methyl-6-(quinolin-5-yl)quinazolin-4(3H)-one (11)</b> | <b>3-(4-Morpholinophenyl)-6-(quinolin-4-yl)quinazolin-4(3H)-one (16)</b> | <b>2,5-Dimethyl-6-(quinolin-4-yl)quinazolin-4(3H)-one (21)</b> |
|---------------------------------|------------------------------------------------------------|--------------------------------------------------------------------------|----------------------------------------------------------------|
| PDB ID                          | 6GI6                                                       | 6GIN                                                                     | 6GIP                                                           |
| Wavelength (Å)                  | 0.9795                                                     | 0.9795                                                                   | 0.9763                                                         |
| Resolution range                | 53.33 - 1.98 (2.06 - 1.98)                                 | 73.42 - 2.20 (2.28 - 2.20)                                               | 57.89 - 2.17 (2.24 - 2.17)                                     |
| Space group                     | P 32 2 1                                                   | P 2 21 21                                                                | P 32 2 1                                                       |
| a b c (Å)                       | 66.15, 66.15, 146.00                                       | 59.08, 86.39, 139.29                                                     | 66.85, 66.85, 139.93                                           |
| $\alpha$ $\beta$ $\gamma$ (°)   | 90, 90, 120                                                | 90, 90, 90,                                                              | 90, 90, 120,                                                   |
| Total reflections               | 50508 (5016)                                               | 72347 (7162)                                                             | 39652 (3882)                                                   |
| Unique reflections              | 26281 (2603)                                               | 36780 (3651)                                                             | 19839 (1943)                                                   |
| Multiplicity                    | 4.2 (4.4)                                                  | 4.6 (4.1)                                                                | 7.5 (7.7)                                                      |
| Completeness (%)                | 99.59 (99.62)                                              | 99.76 (99.78)                                                            | 100.00 (100.00)                                                |
| Mean I/sigma(I)                 | 4.29 (1.68)                                                | 9.10 (3.01)                                                              | 8.0 (2.0)                                                      |
| Wilson B-factor                 | 16.22                                                      | 25.82                                                                    | 21.71                                                          |
| R-merge                         | 0.141 (0.457)                                              | 0.051 (0.242)                                                            | 0.245 (1.216)                                                  |
| Reflections used in refinement  | 26281 (2603)                                               | 36767 (3650)                                                             | 30159 (2950)                                                   |
| Reflections used for R-free     | 1302 (125)                                                 | 1916 (187)                                                               | 1550 (136)                                                     |
| R-work                          | 0.2233                                                     | 0.1838                                                                   | 0.1945                                                         |
| R-free                          | 0.2684                                                     | 0.2323                                                                   | 0.2361                                                         |
| Number of non-hydrogen atoms    | 2605                                                       | 5157                                                                     | 2518                                                           |
| macromolecules                  | 2353                                                       | 4676                                                                     | 2363                                                           |
| ligands                         | 81                                                         | 104                                                                      | 51                                                             |
| solvent                         | 171                                                        | 377                                                                      | 104                                                            |
| Protein residues                | 298                                                        | 592                                                                      | 296                                                            |
| RMS(bonds, Å)                   | 0.007                                                      | 0.006                                                                    | 0.008                                                          |
| RMS(angles, °)                  | 0.97                                                       | 0.94                                                                     | 1.21                                                           |
| Ramachandran favored (%)        | 97.97                                                      | 97.96                                                                    | 96.94                                                          |
| Ramachandran allowed (%)        | 2.03                                                       | 1.87                                                                     | 3.06                                                           |
| Ramachandran outliers (%)       | 0                                                          | 0.17                                                                     | 0                                                              |
| Rotamer outliers (%)            | 0                                                          | 0.2                                                                      | 0.39                                                           |
| Average B-factor macromolecules | 16.47                                                      | 33.39                                                                    | 22.2                                                           |
| ligands                         | 15.9                                                       | 32.94                                                                    | 21.7                                                           |
| solvent                         | 24.72                                                      | 29.42                                                                    | 37.6                                                           |
| Number of TLS groups            | 20.36                                                      | 40.13                                                                    | 24.7                                                           |
|                                 | 3                                                          | 8                                                                        | -                                                              |

### 3. Experimental procedures

#### 3.1. Co-crystal Structure Determination

The construct used runs from residue V204 to D499 (Uniprot ID, Q04771) which includes the kinase domain of ALK2, and was prepared as detailed previously<sup>1</sup> concentrated to 10 mg/mL buffered in 50 mM HEPES, pH 7.5, 300 mM NaCl, 10 mM DTT. The construct contains the Q207D activating mutation; chosen to be a constitutively active mutation based upon the physiological Q207E mutation seen in the condition Fibrodysplasia Ossificans Progressiva. Mass spectrometry confirmed that the sample crystallised is un-phosphorylated, however upon addition of ATP autophosphorylate was observed (also by mass spectrometry) thus confirming that the kinase is still active. Crystallization was performed using the sitting drop vapor diffusion method at 4 °C. Viable crystals of ALK2 in complex with test compound grew as follows: Compound **11** in a 150 nL drop, mixing the protein, preincubated with 1 mM compound, with a reservoir solution containing 1.5 M ammonium sulfate, 0.1 M sodium chloride, 0.1 M bis-tris pH 6.5 at a 2:1 volume ratio. Compound **16** in a 150 nL drop, mixing the protein, preincubated with 1 mM compound, with a reservoir solution containing 1.6 M ammonium sulfate, 12% glycerol, 0.1 M tris pH 8.5 at a 1:1 volume ratio. Compound **21** in a 150 nL drop, mixing the protein, preincubated with 1 mM compound, with a reservoir solution containing 1.5 M ammonium sulfate, 0.1 M tris pH 8.5, 4% glycerol at a 2:1 volume ratio. Crystals were transferred into a cryoprotective solution prepared from the mother liquor supplemented with 25% ethylene glycol prior to vitrification in liquid nitrogen. Diffraction data were collected at Diamond Light Source (beamlines I02 (**11**), I04 (**16**) and I03 (**21**)), and were processed and scaled with MOSFLM<sup>2</sup> and AIMLESS from the CCP4 suite<sup>3</sup>. The structures were solved by molecular replacement using PHASER<sup>4</sup> and the structure of the ALK2-LDN-193189 complex (PDB 3Q4U) as a search model. Subsequent manual model building was performed using COOT<sup>5</sup> alternated with refinement in REFMAC<sup>6</sup> or PHENIX Refine<sup>7</sup>. TLS-restrained refinement was applied in the latter cycles using the input thermal motion parameters determined by the TLSMD server<sup>8</sup>. The final model was verified for geometry correctness with PHENIX validation tools<sup>7</sup> and MOLPROBITY<sup>9</sup>. Data collection and refinement statistics are summarized in **Table S2**.

#### 3.2. Cell culture

Patient-derived culture HSJD-DIPG-007 (*H3F3A* K27M, *ACVR1* R206H) was grown in stem cell media consisting of Dulbecco's Modified Eagles Medium: Nutrient Mixture F12 (DMEM/F12), Neurobasal-A Medium, HEPES Buffer Solution 1 M, Sodium Pyruvate Solution 100 nM, Non-Essential Amino Acids Solution 10 mM, Glutamax-I Supplement and Antibiotic-Antimycotic solution (all Thermo Fisher, Loughborough, UK). The media was supplemented

with B-27 Supplement Minus Vitamin A, (Thermo Fisher), 20 ng/ml Human-EGF, 20 ng/ml Human-FGF-basic-154, 20 ng/ml Human-PDGF-AA, 20 ng/ml Human-PDGF-BB (all Shenandoah Biotech, Warwick, PA, USA) and 2 µg/ml Heparin Solution (0.2%, Stem Cell Technologies, Cambridge, UK). Cell authenticity was verified using short tandem repeat (STR) DNA fingerprinting.

### **3.3. Western blot analysis**

For treatment with **24**, cells were incubated in complete media with vehicle or increasing concentrations of compounds (0.1, 1, 10 µM) and protein was collected at 18 hr post-treatment. Samples were lysed by using lysis buffer containing phosphatase inhibitor cocktail (Sigma, Poole, UK) and protease inhibitor cocktail (Roche Diagnostics, Burgess Hill, UK). Following quantification using Pierce BCA Protein Assay Kit (Thermo Fisher), equal amounts of cell extracts were loaded for western blot analysis. Membranes were incubated with primary antibody (1:1000) overnight at 4 °C, and horseradish peroxidase secondary antibody (Amersham Bioscience, Amersham, UK) for 1 hr at room temperature. Signal was detected with ECL Prime Western blotting detection agent (Amersham Biosciences), visualised using Hyperfilm ECL (Amersham Biosciences) and analysed using an x-ray film processor in accordance with standard protocols. Primary antibodies used were phospho-SMAD1/5/8 (CST#13820), SMAD1/5/8 (SC#6031), ID1 (SC#488) and GAPDH (CST#2118).

### 3.4. LCMS method details

LCMS analyses and high resolution mass spectrometry were performed on an Agilent 1200 series HPLC and diode array detector coupled to a 6210 time of flight mass spectrometer with dual multimode APCI/ESI source (Methods A and B) or a Waters Acquity UPLC and diode array detector coupled to a Waters G2 QToF mass spectrometer fitted with a multimode ESI/APCI source (Method C). Samples were supplied as approximately 1 mg/mL solutions in MeOH, acetone, CH<sub>2</sub>Cl<sub>2</sub> or MeOH/H<sub>2</sub>O with 0.5-10 µL injected on a partial loop fill. Method A: Analytical separation was carried out at 30 °C on a Merck Purospher STAR column (RP-18e, 30 x 4 mm) using a flow rate of 1.5 mL/min in a 4 minute gradient elution with detection at 254 nm. The mobile phase was a mixture of methanol (solvent A) and water containing formic acid at 0.1% (solvent B). Gradient elution was as follows: 1:9 (A/B) to 9:1 (A/B) over 2.5 min, 9:1 (A/B) for 1 min, and then reversion back to 1:9 (A/B) over 0.3 min, finally 1:9 (A/B) for 0.2 min. Method B: Analytical separation was carried out at 40 °C on a Merck Purospher STAR column (RP-18e, 30 x 4 mm) using a flow rate of 3 mL/min in a 2 minute gradient elution with detection at 254 nm. The mobile phase was a mixture of methanol (solvent A) and water containing formic acid at 0.1% (solvent B). Gradient elution was as follows: 1:9 (A/B) to 9:1 (A/B) over 1.25 min, 9:1 (A/B) for 0.5 min, and then reversion back to 1:9 (A/B) over 0.15 min, finally 1:9 (A/B) for 0.1 min. Method C: Analytical separation was carried out at 30 °C on a Phenomenex Kinetex XB-C18 column (30 x 2.1 mm, 1.7u, 100A) using a flow rate of 0.5 mL/min in a 2 minute gradient elution with detection at 254 nm. The mobile phase was a mixture of MeOH (solvent A) and water containing formic acid at 0.1% (solvent B). Gradient elution was as follows: 1:9 (A/B) to 9:1 (A/B) over 1.25 min, 9:1 (A/B) for 0.5 min, and then reversion back to 1:9 (A/B) over 0.15 min, finally 1:9 (A/B) for 0.1 min. UV absorbance spectra were collected at a wavelength of 254 nm. HRMS references: caffeine [M+H]<sup>+</sup> 195.08765; reserpine [M+H]<sup>+</sup> 609.28066 or hexakis (2,2-difluoroethoxy)phosphazene [M+H]<sup>+</sup> 622.02896; and hexakis(1H,1H,3H-tetrafluoropentoxy)phosphazene [M+H]<sup>+</sup> 922.00980.

### 3.5. Preparative HPLC method details

For preparative HPLC, standard injections (with needle wash) of the sample were made onto a Phenomenex Gemini C18 column (250 x 21.2 Phenomenex, Torrance, CA, USA) or an ACE 5 C18-PFP column (250 x 21.2 mm Advanced Chromatography Technologies, Aberdeen, UK). UV-Vis spectra were acquired at 254 nm on a 1200 Series Prep Scale diode array detector (Agilent, Santa Clara, USA). Post-UV & pre-MS splitting was achieved using an Active Split (Agilent, Santa Clara, USA) before being infused into a 6120 Series Quad mass spectrometer fitted with an ESI/APCI Multimode ionisation source (Agilent, Santa

Clara, USA). LC eluent and nebulising gas was introduced into the grounded nebuliser with spray direction orthogonal to the capillary axis. 2 kV was applied to the charging electrode to generate a charged aerosol. The aerosol was dried by infrared emitters (200 °C) and heated drying gas (12 L/min of nitrogen at 350 °C, 60 psi), producing ions by ESI. Aerosol and ions were transferred by nebulising gas to the APCI zone where infrared emitters vaporized solvent and analyte. A corona discharge was produced between the corona needle and APCI counter electrode by applying a current of 4  $\mu$ A, ionizing the solvent to transfer charge to analyte molecules, producing ions by APCI. ESI and APCI ions simultaneously entered the transfer capillary along which a potential difference of 4 kV was applied. The fragmentor voltage was set at 175 V and skimmer at 65 V. Signal was optimised by AutoTune.m. Profile mass spectrometry data was acquired in positive ionisation mode over a scan range of m/z 60-1000 (scan rate 1.0). Collection was triggered by UV signal and collected on a 1200 Series Fraction Collector (Agilent, Santa Clara, USA). Raw data was processed using Agilent Chemstation Software B.02.01. Chromatographic separation at room temperature was carried out using a 1200 Series Preparative HPLC (Agilent, Santa Clara, USA) over a 15 minute gradient elution (Grad15min20mls.m) from 90:10 to 0:100 water:methanol (both modified with 0.1% formic acid) at a flow rate of 20 mL/min.

## 4. NMR

### 6-Bromo-3-(4-morpholinophenyl)quinazolin-4(3H)-one, i

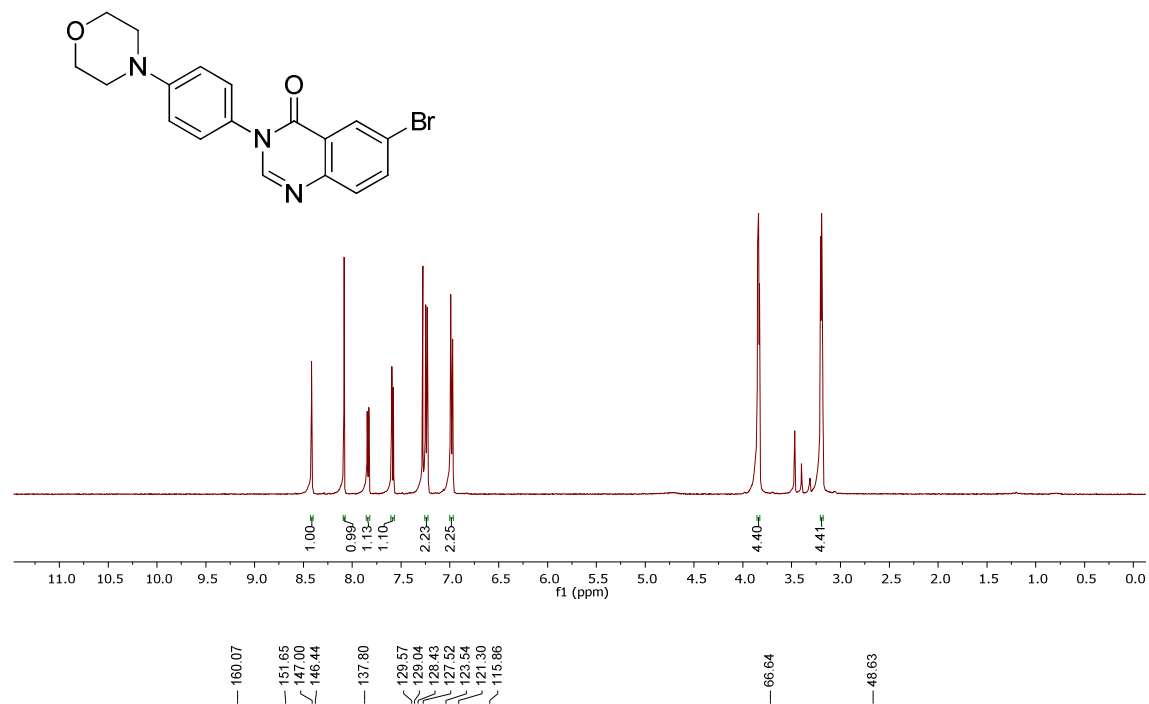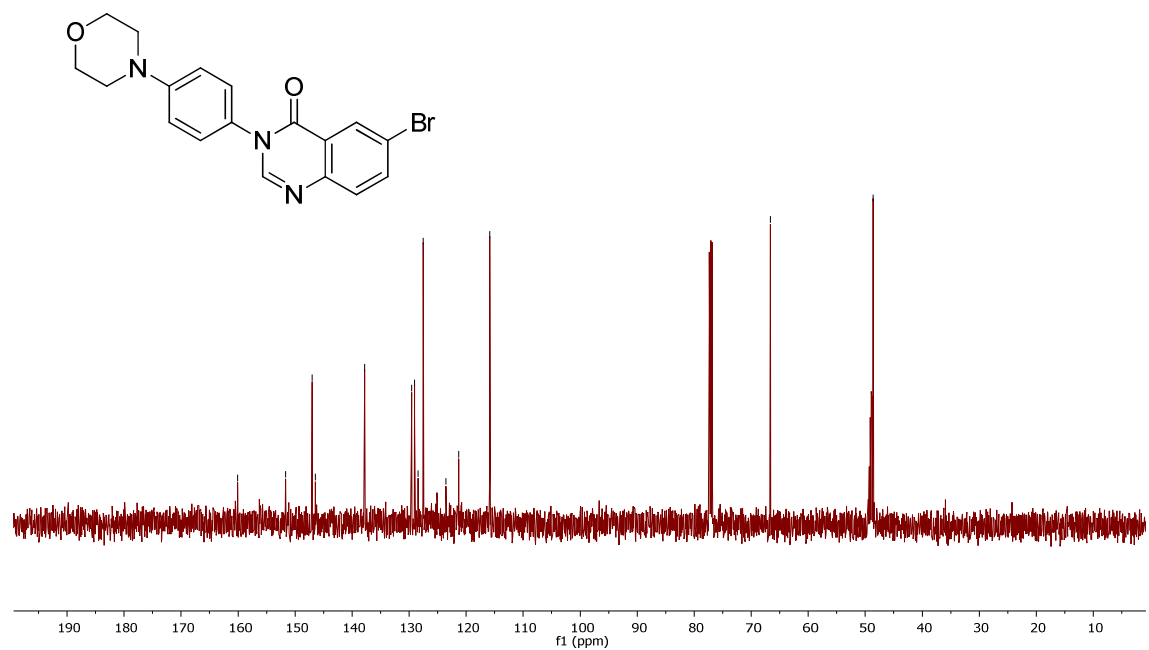

6-Bromo-3-phenylquinazolin-4(3H)-one, ii

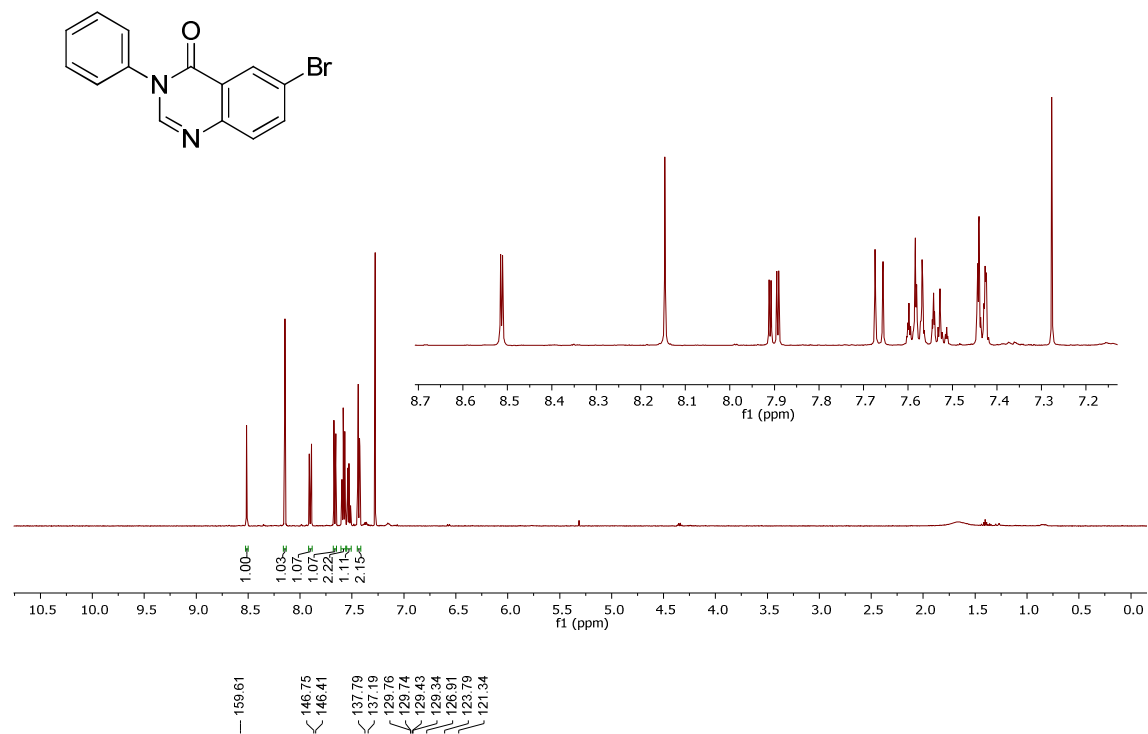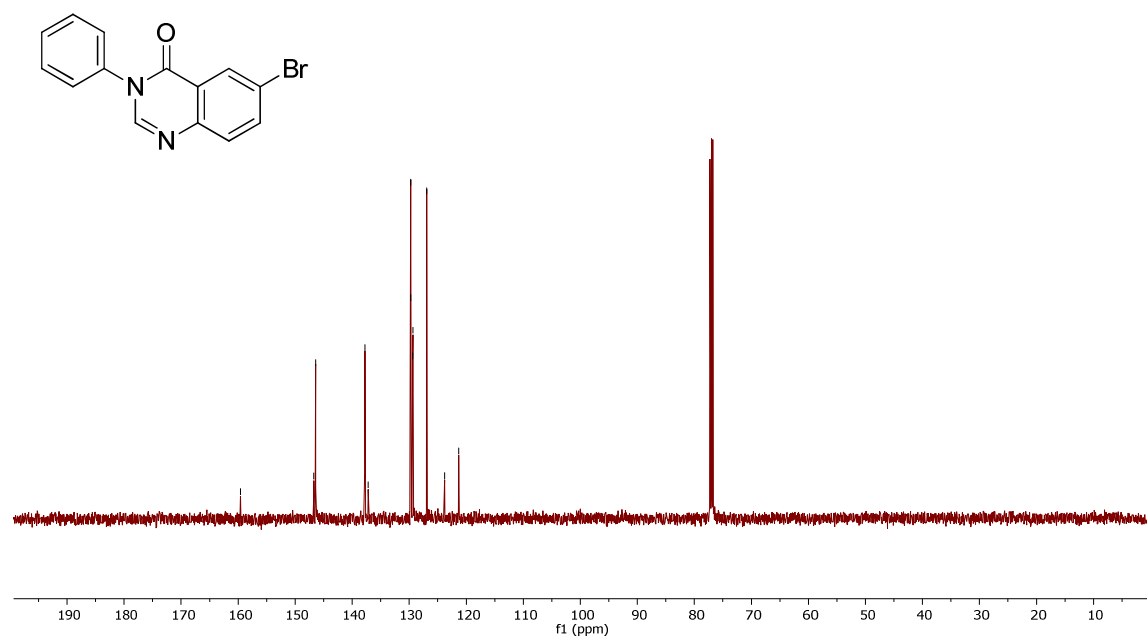

6-Bromo-3-cyclohexylquinazolin-4(3H)-one, iii

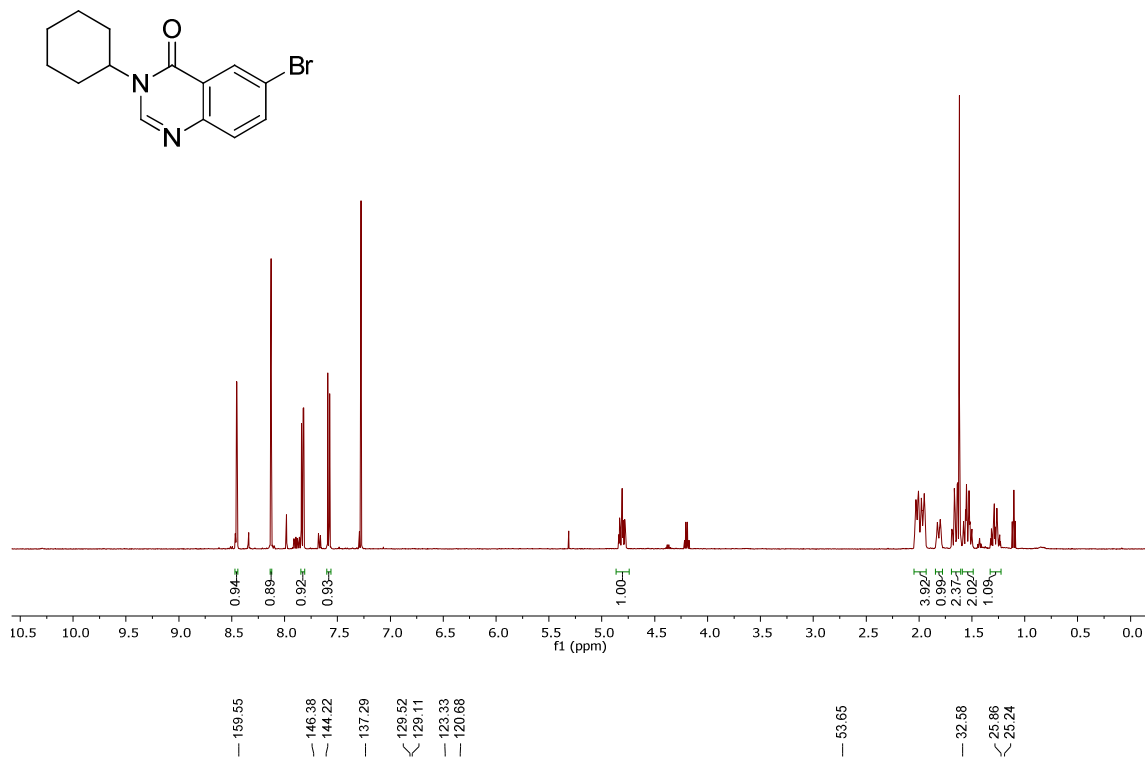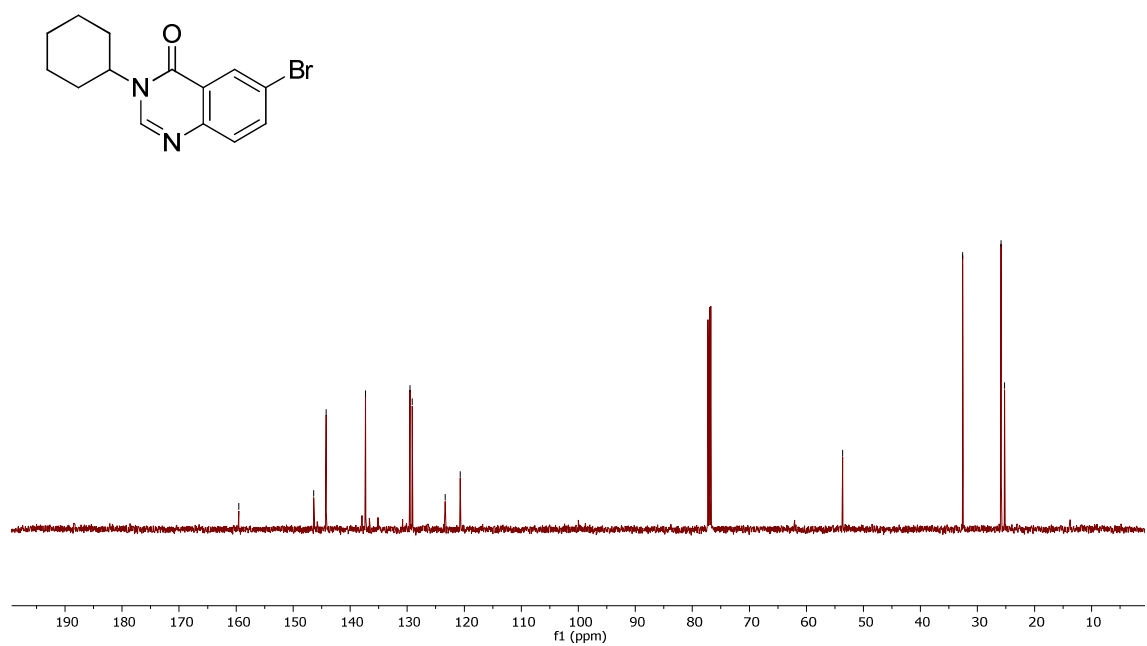



6-Bromo-3-(3-morpholinopropyl)quinazolin-4(3H)-one, iv

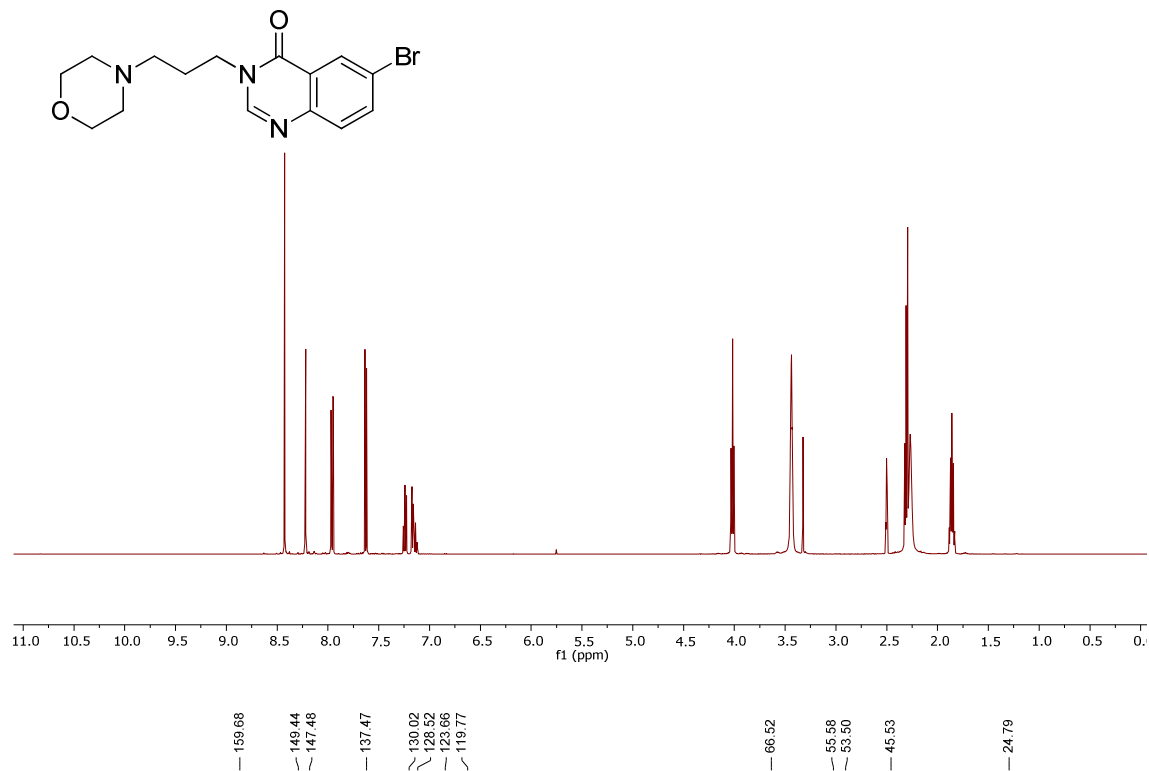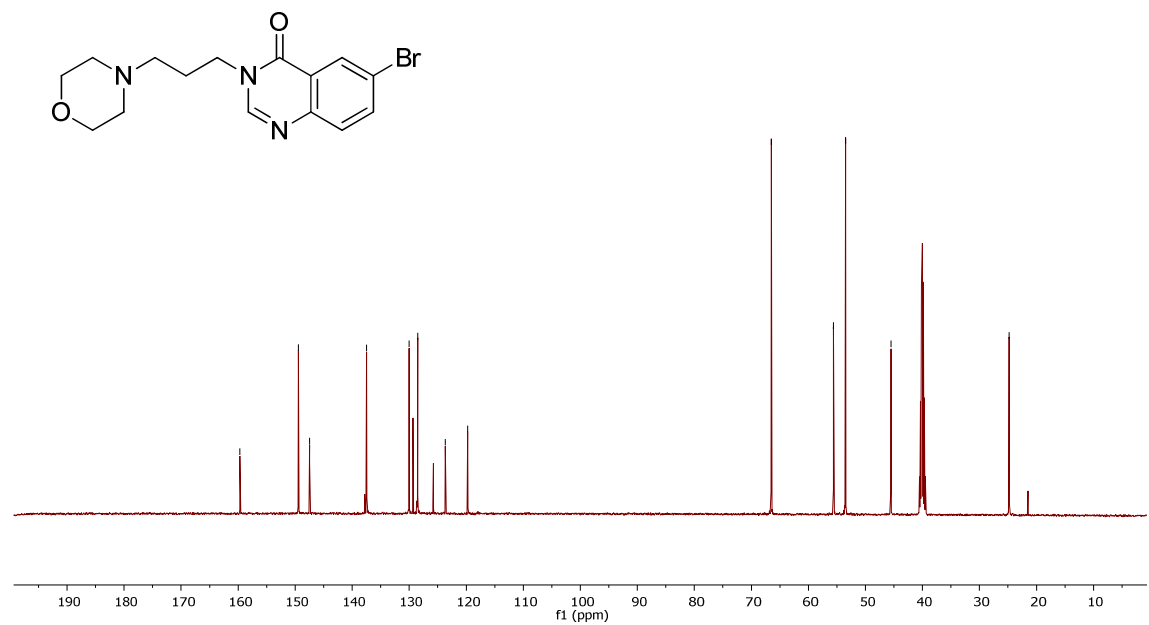

6-Bromo-3-(4-(dimethylamino)phenyl)quinazolin-4(3H)-one, v

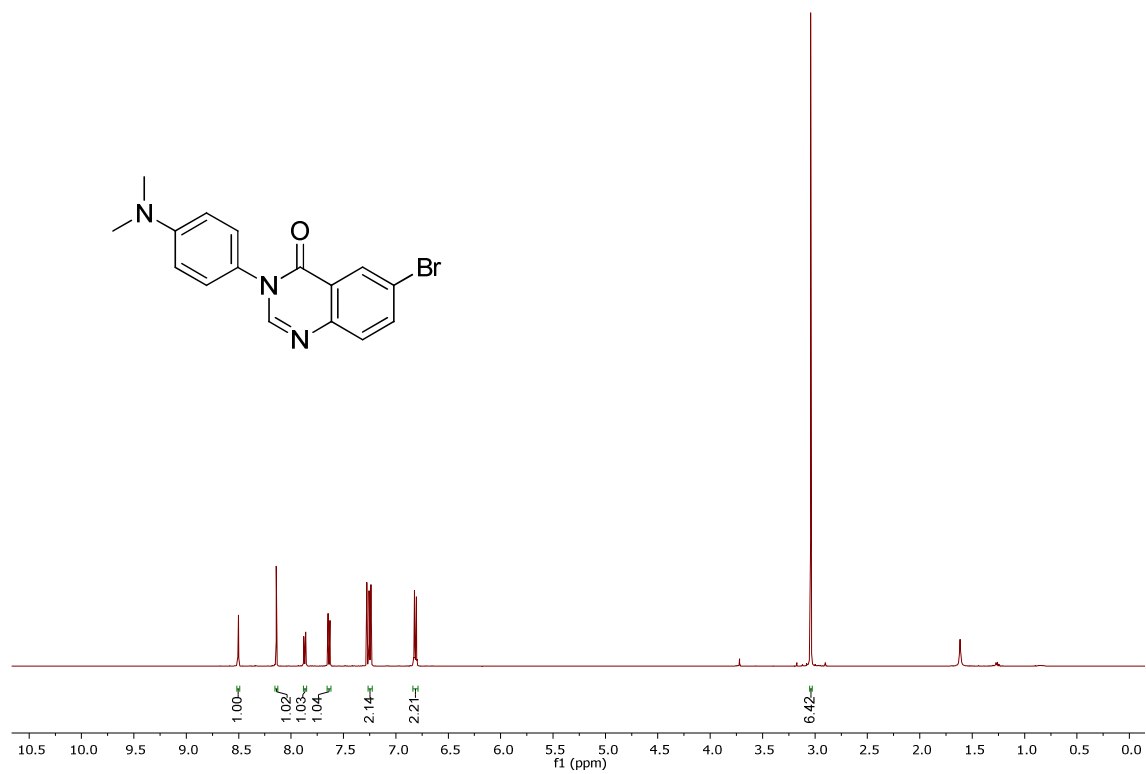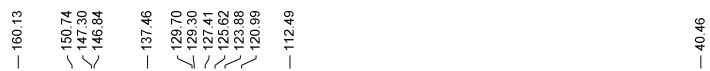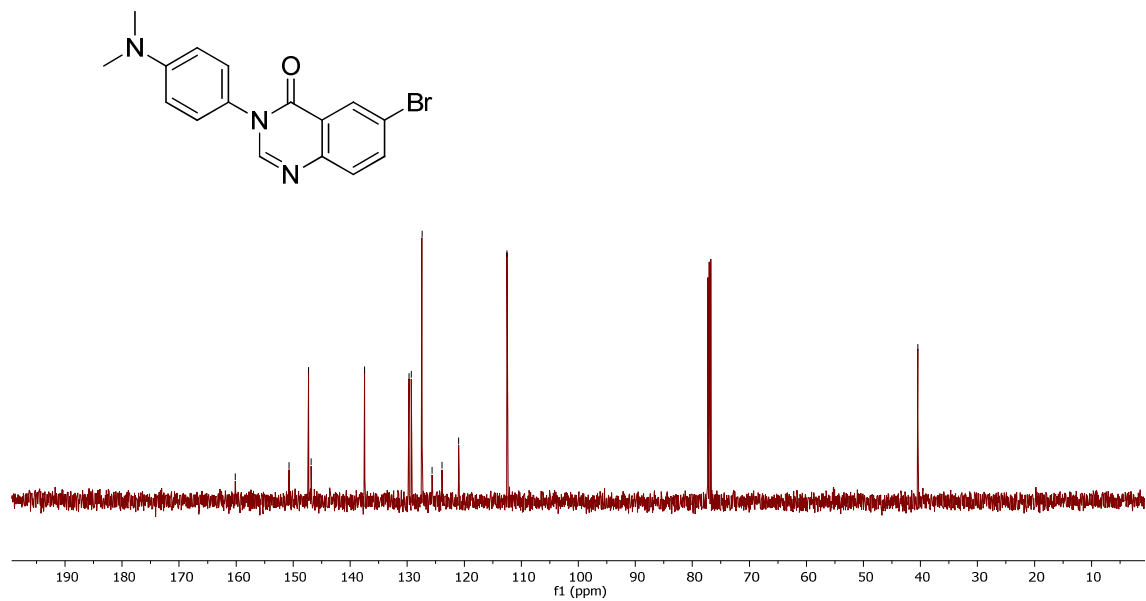

6-Bromo-2-methylquinazolin-4(3H)-one, vi

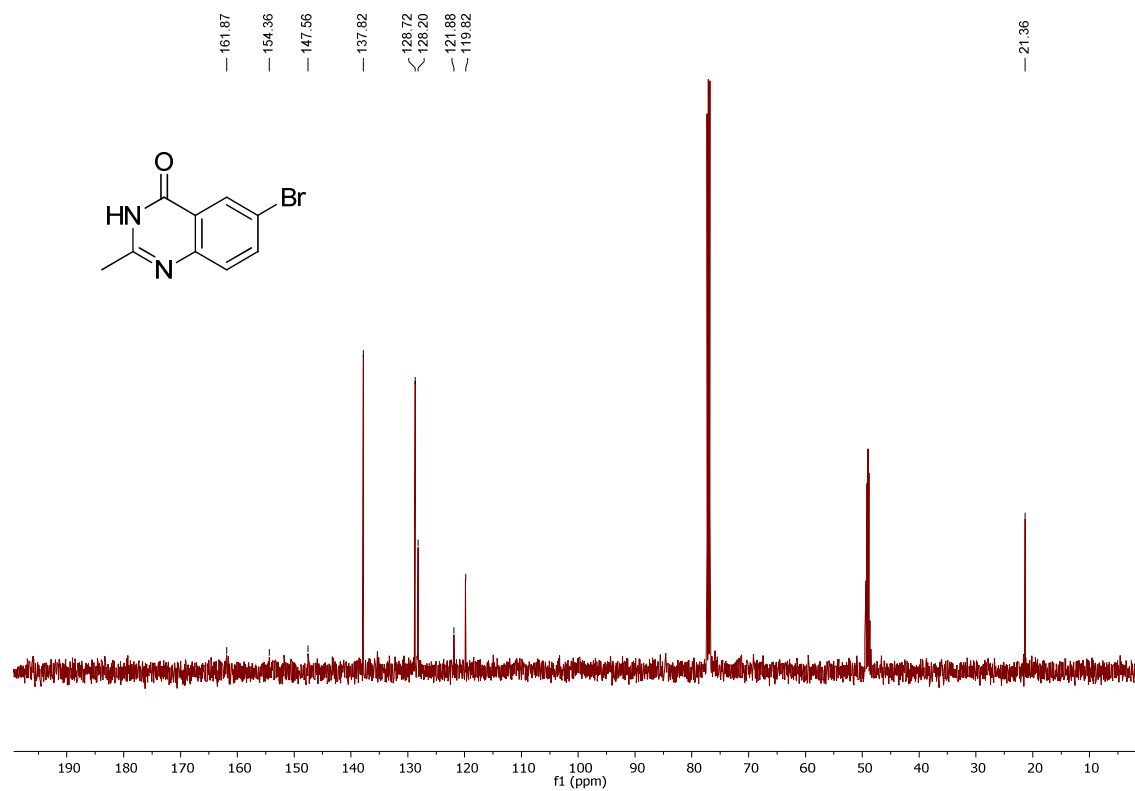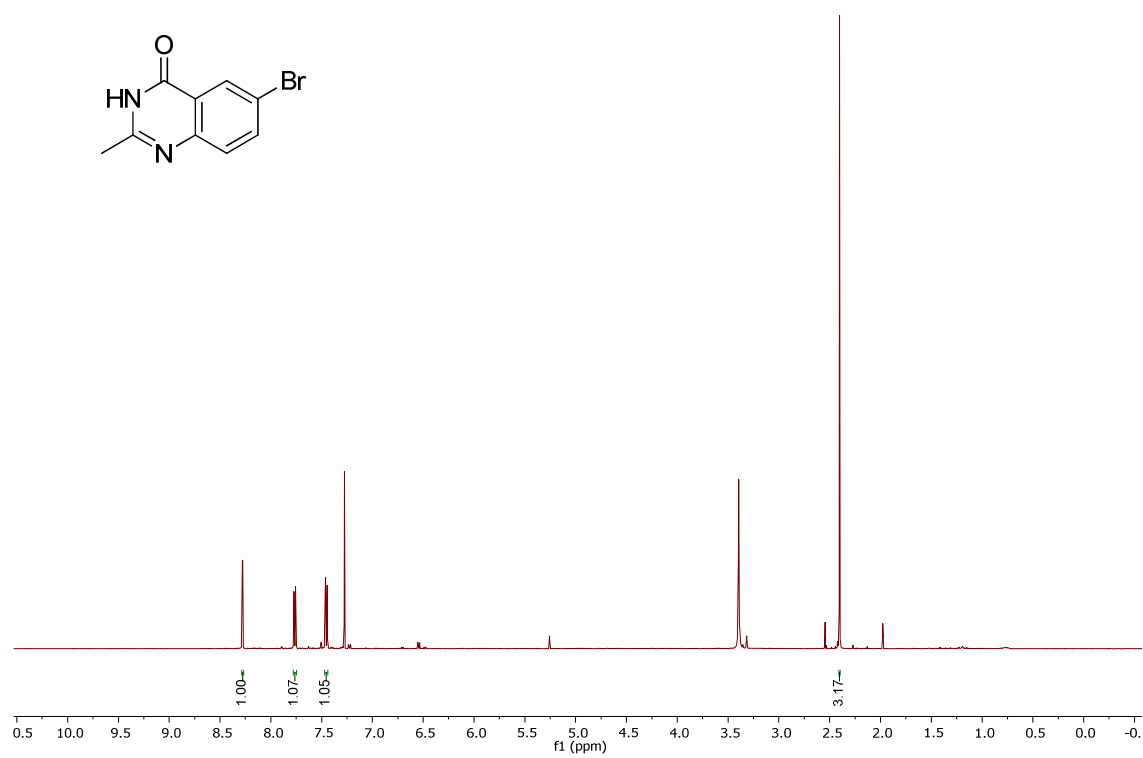

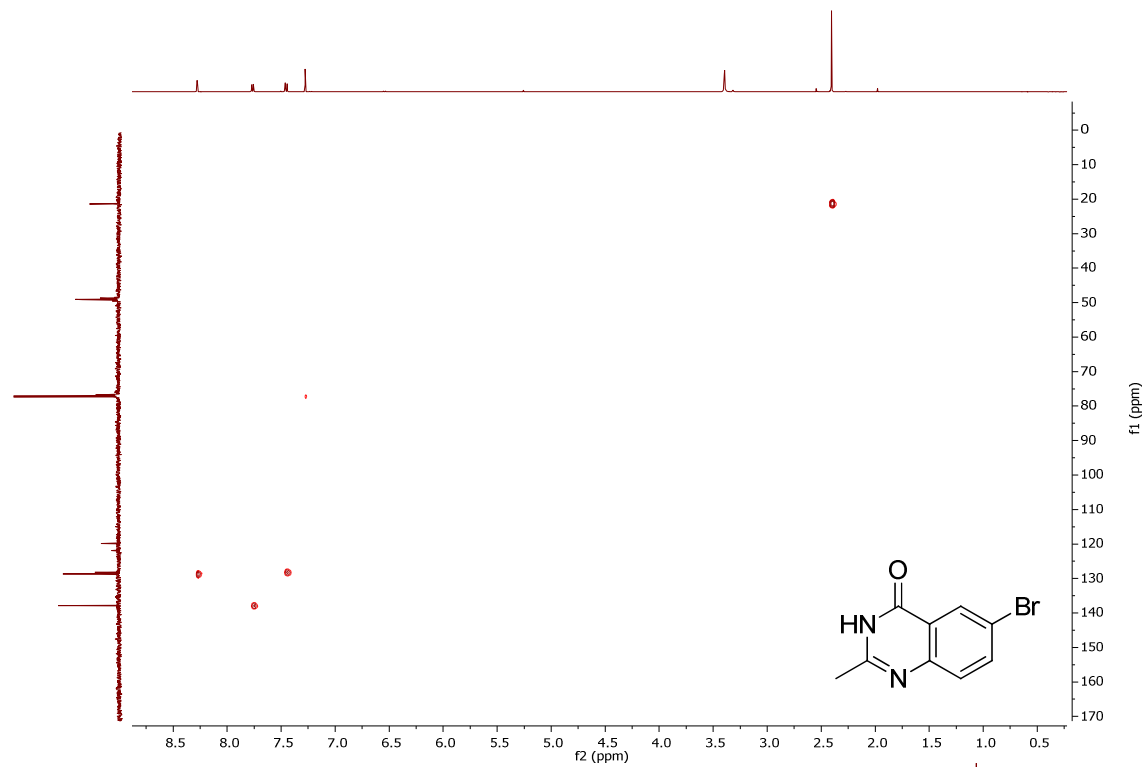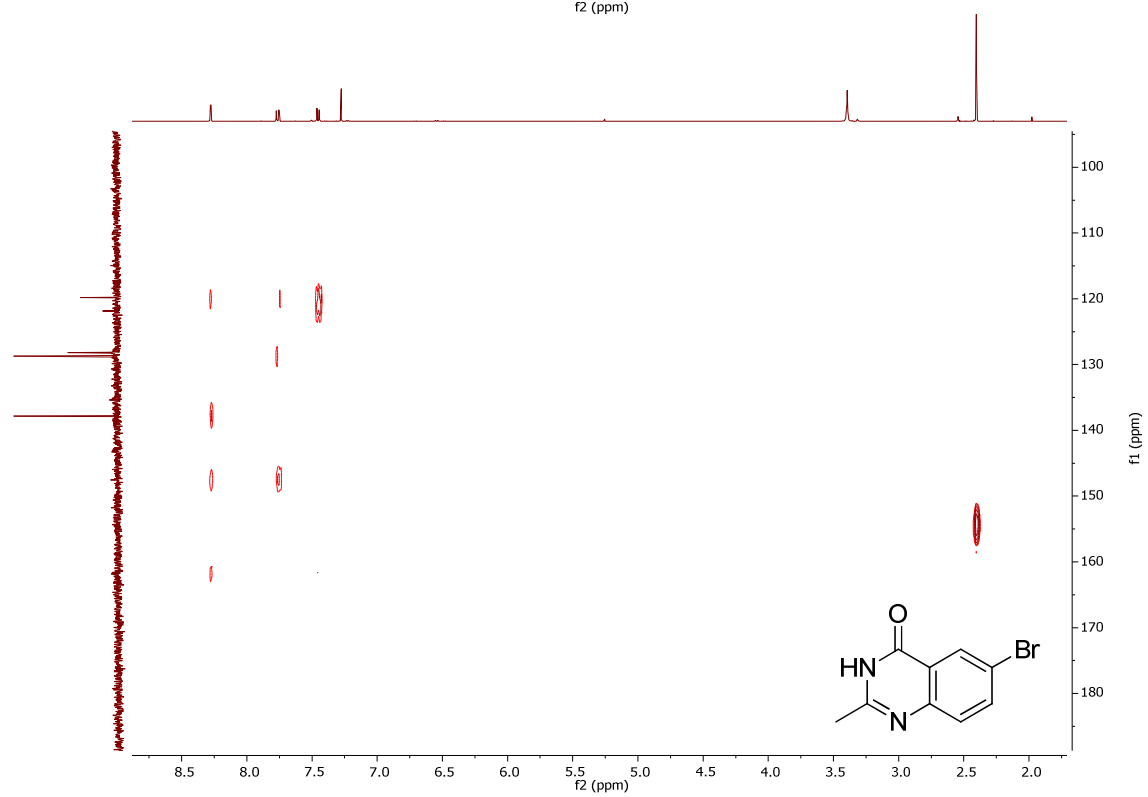

# 6-Bromo-2,5-dimethylquinazolin-4(3H)-one, vii

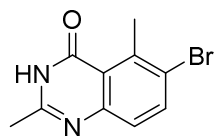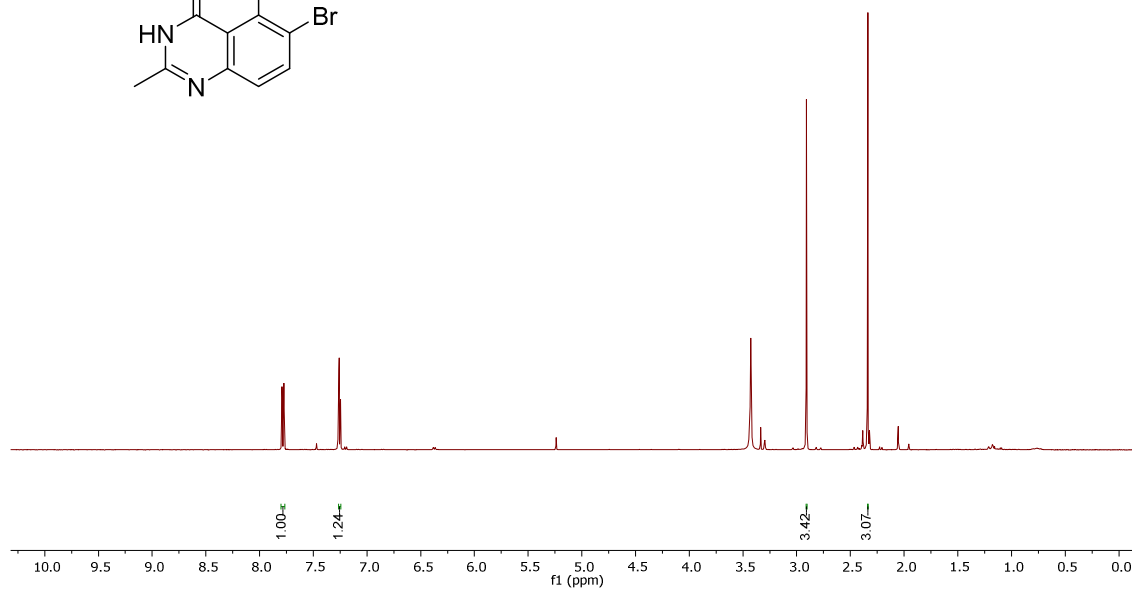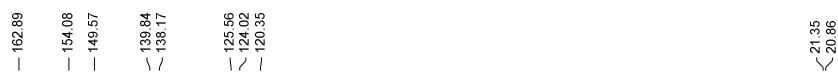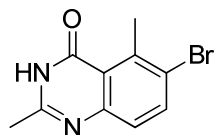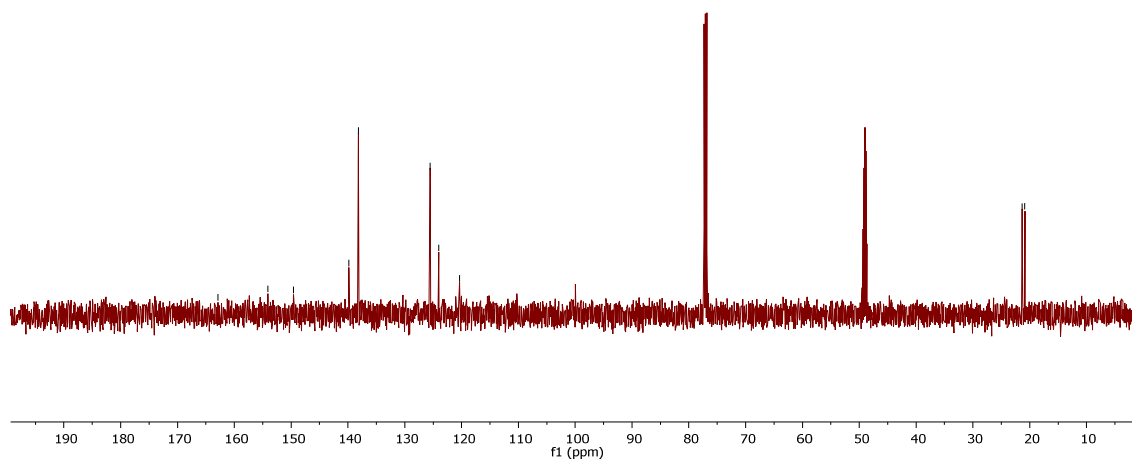

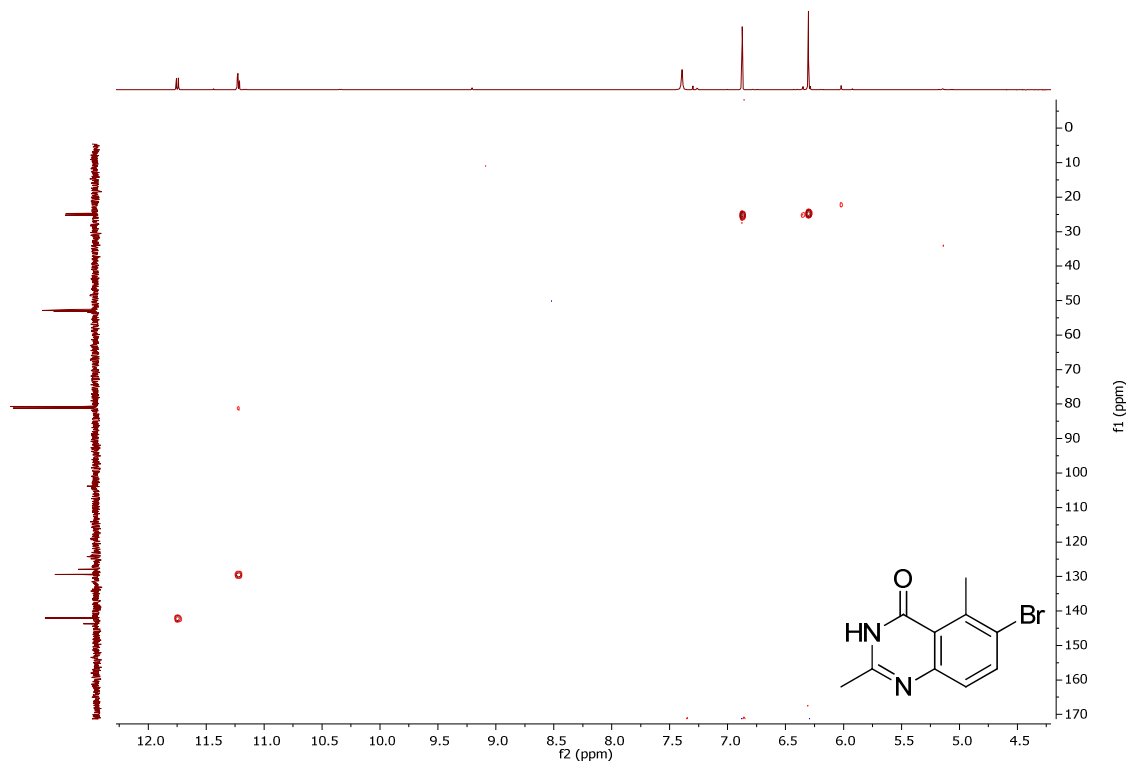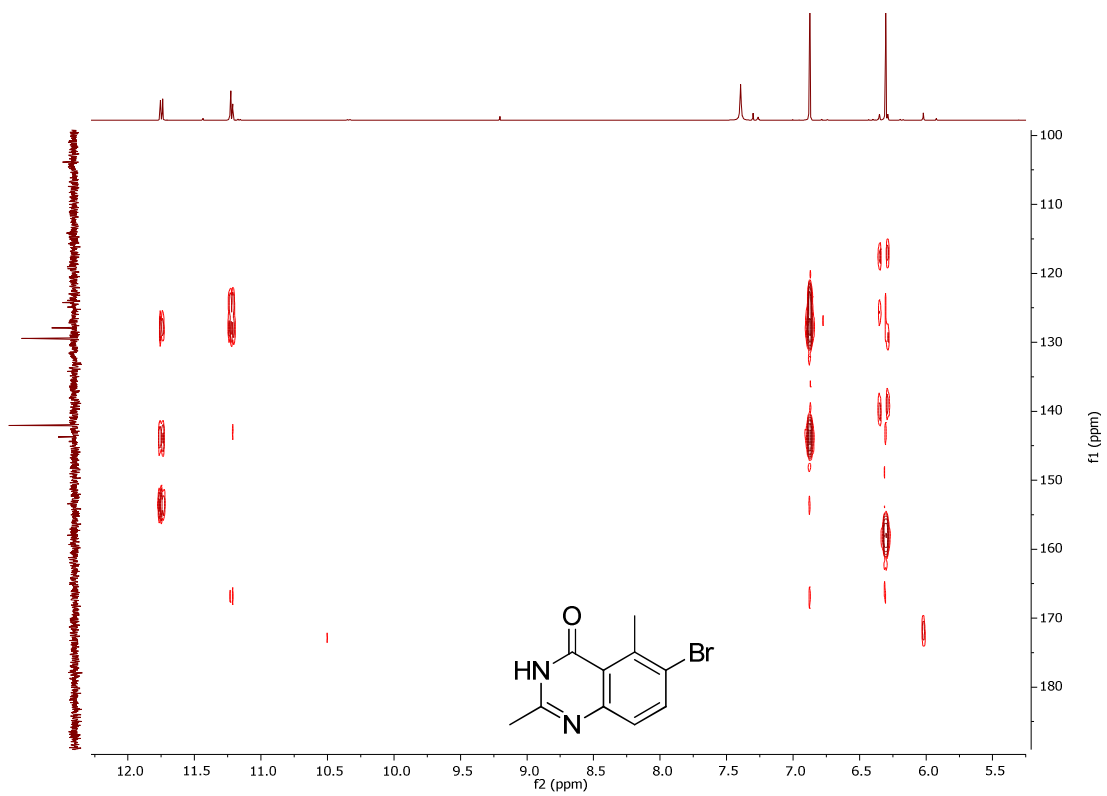

6-Bromo-2-ethyl-5-methylquinazolin-4(3H)-one, viii

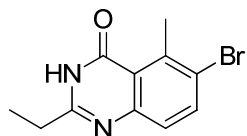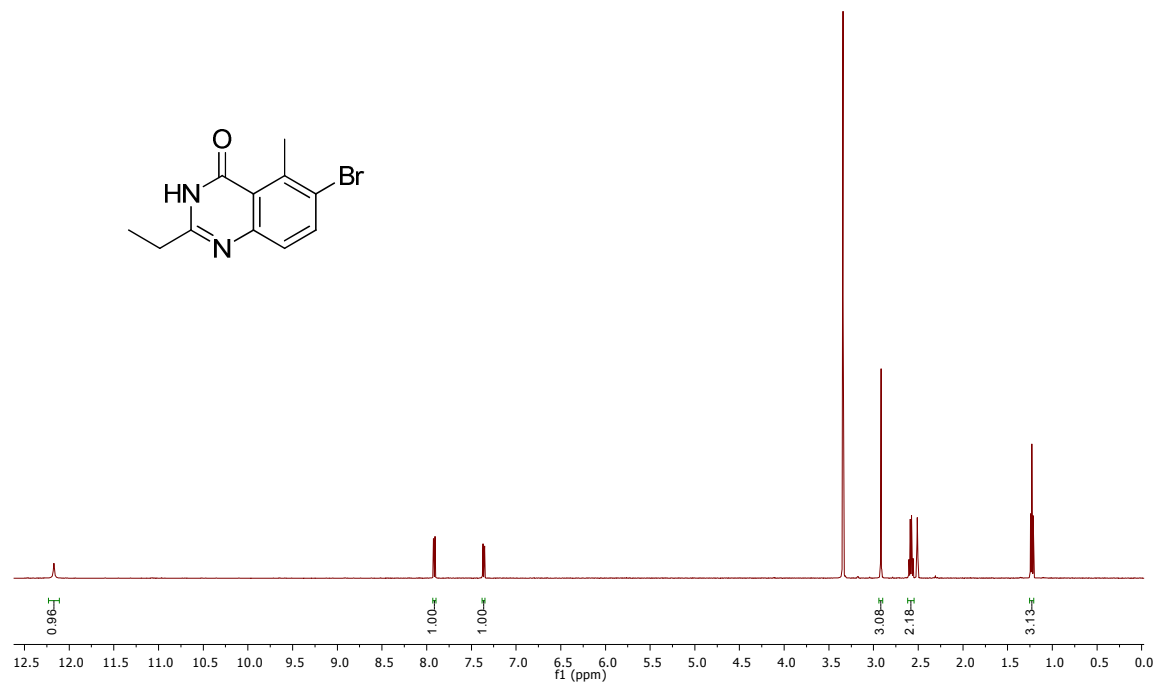

162.45  
159.18  
150.45  
138.98  
137.79  
127.17  
122.94  
121.18  
27.87  
21.54  
11.57

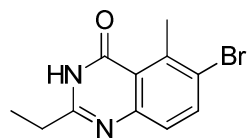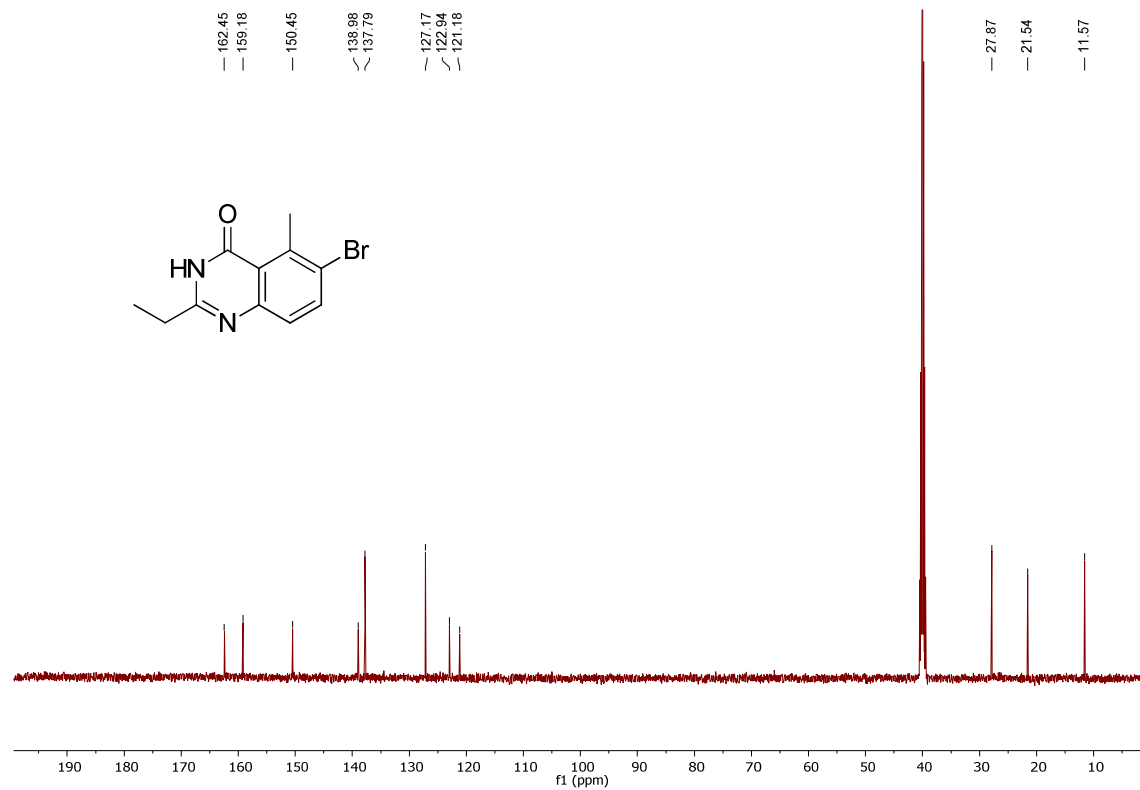

# 4-Bromo-3-cyclopropyl-1-tosyl-1H-pyrazole, ix

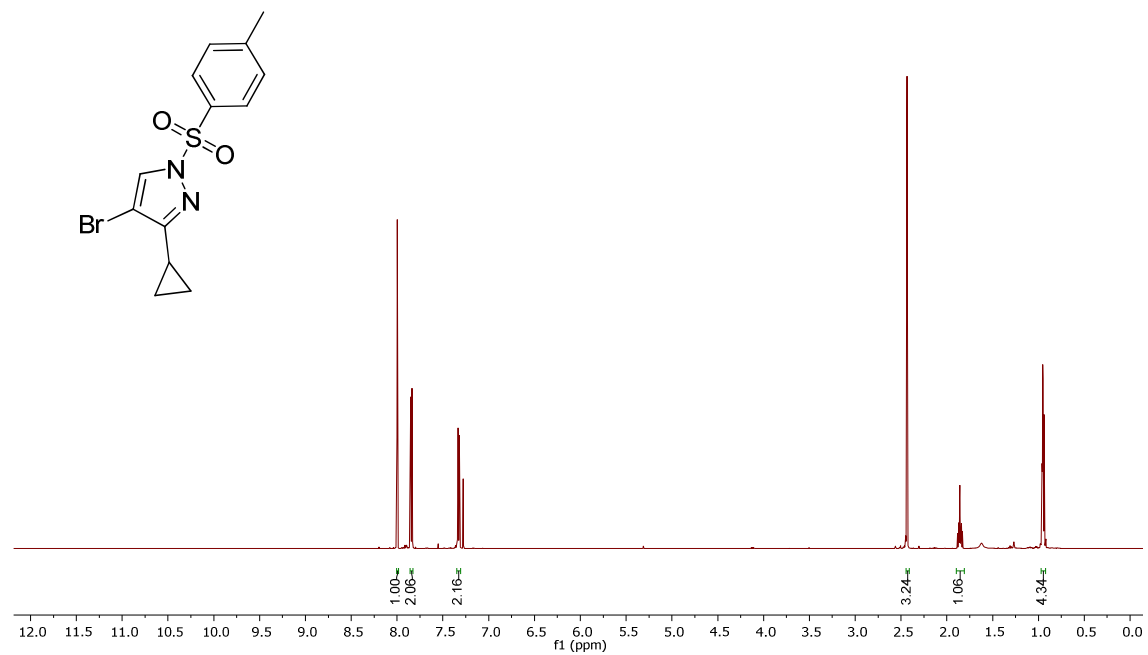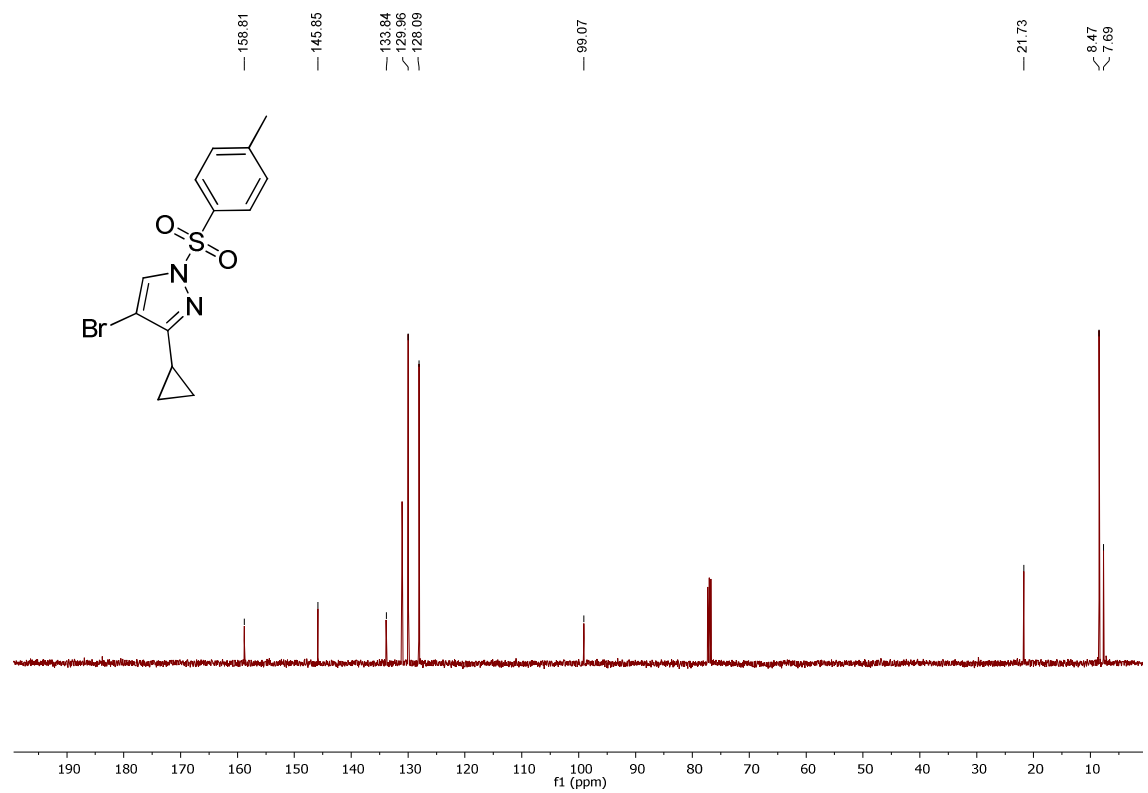



4-Bromo-3-ethyl-1-tosyl-1H-pyrazole, x

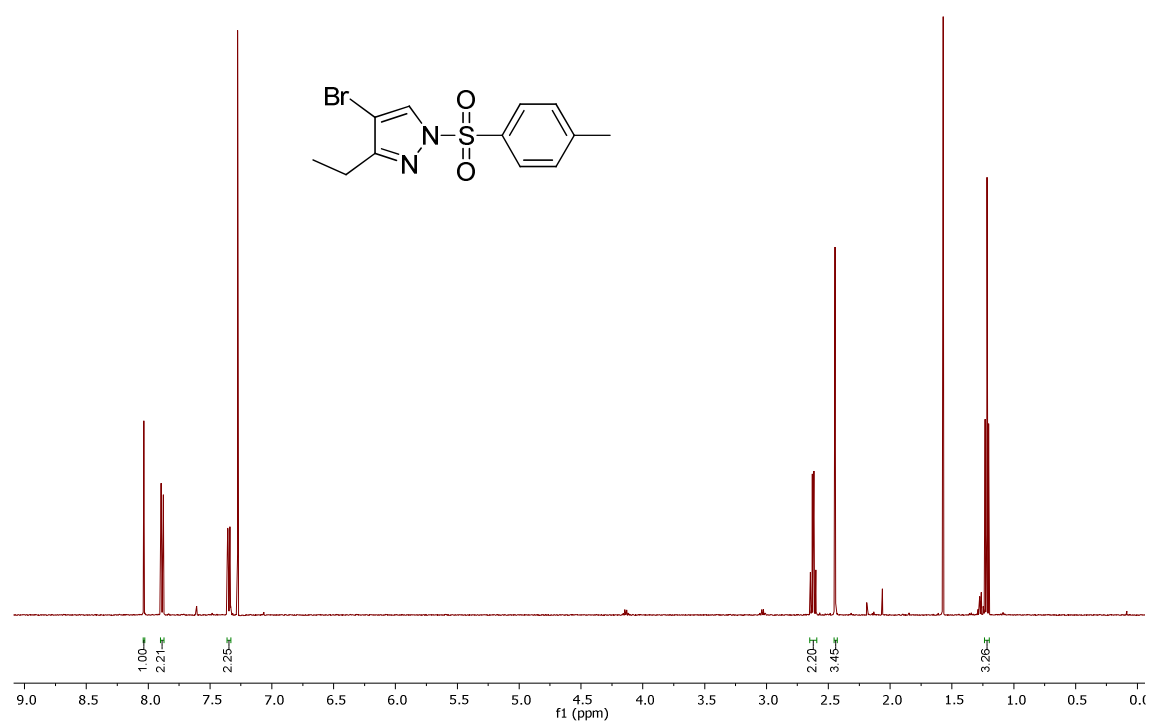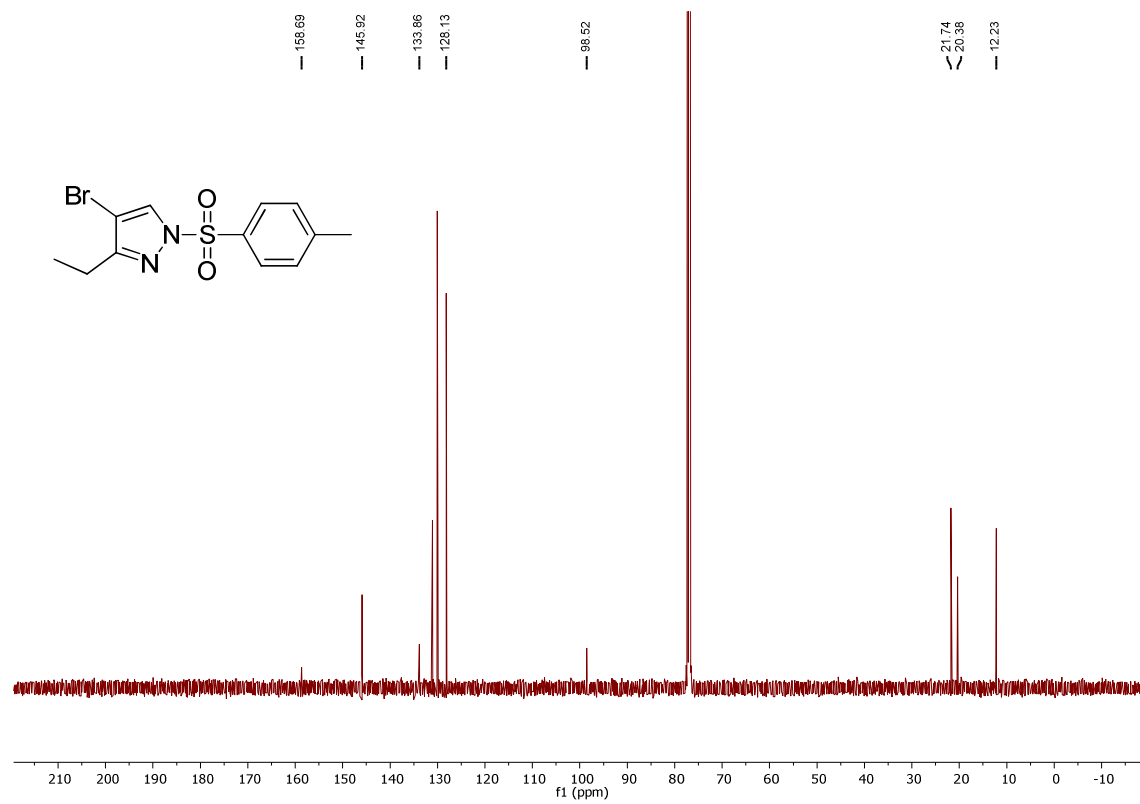

6-(1*H*-Pyrazol-4-yl)quinazolin-4(3*H*)-one, 1

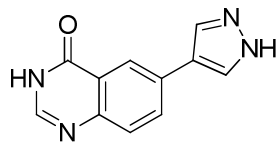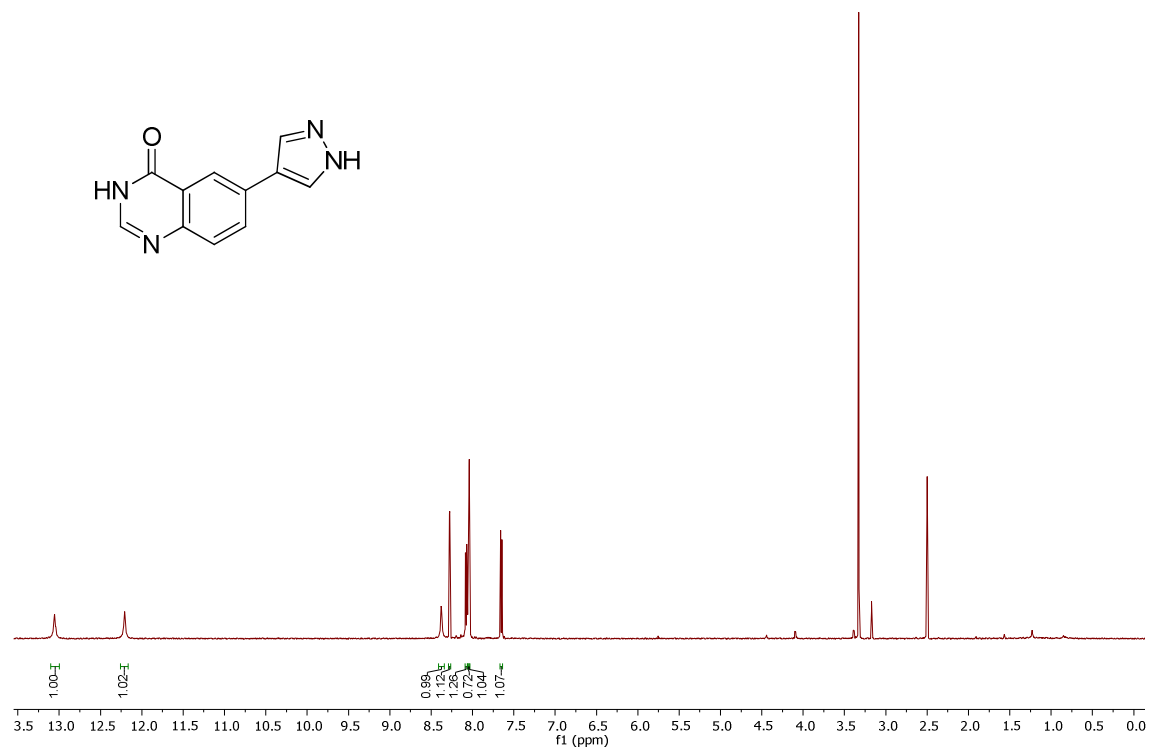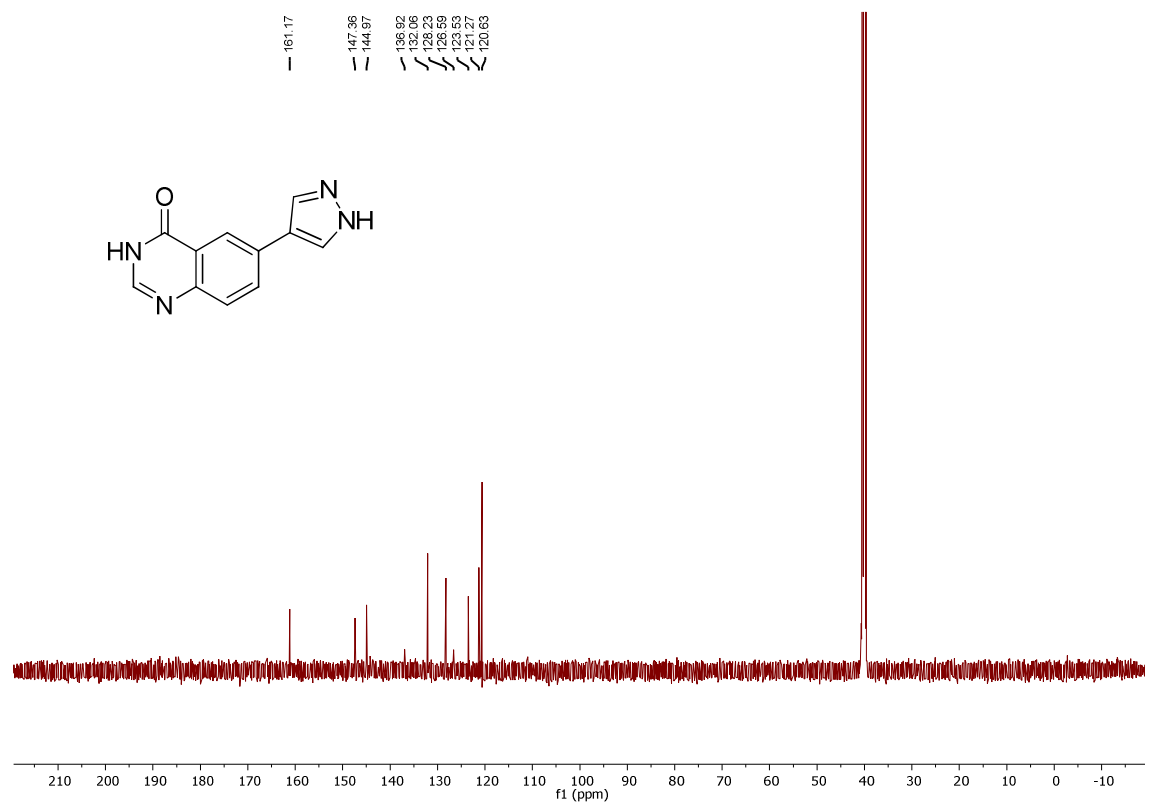

6-(1-Methyl-1H-pyrazol-4-yl)quinazolin-4(3H)-one, 2

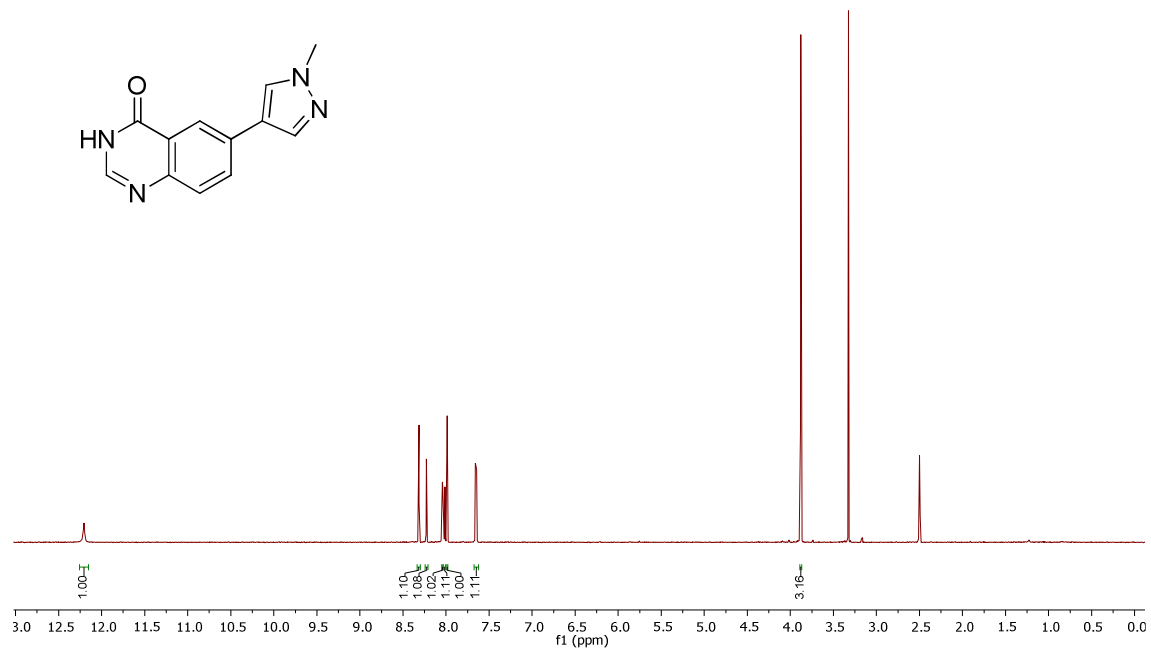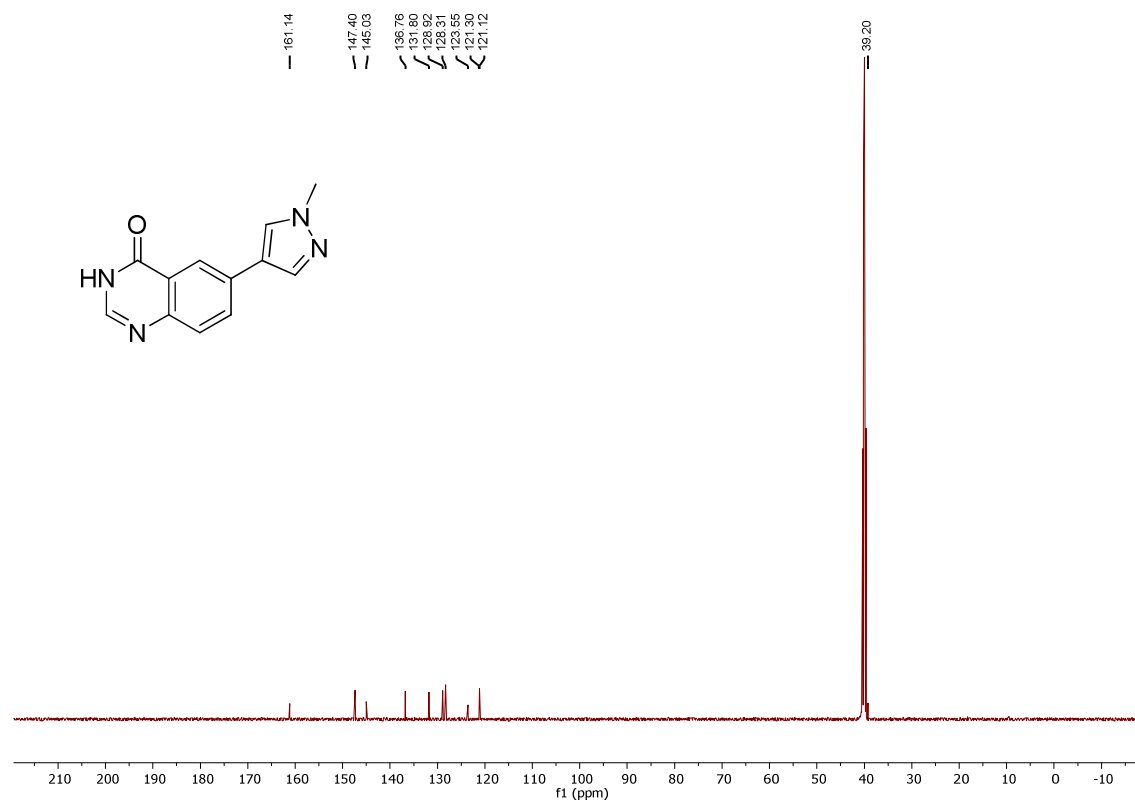

6-(3-Methyl-1H-pyrazol-4-yl)quinazolin-4(3H)-one, 3

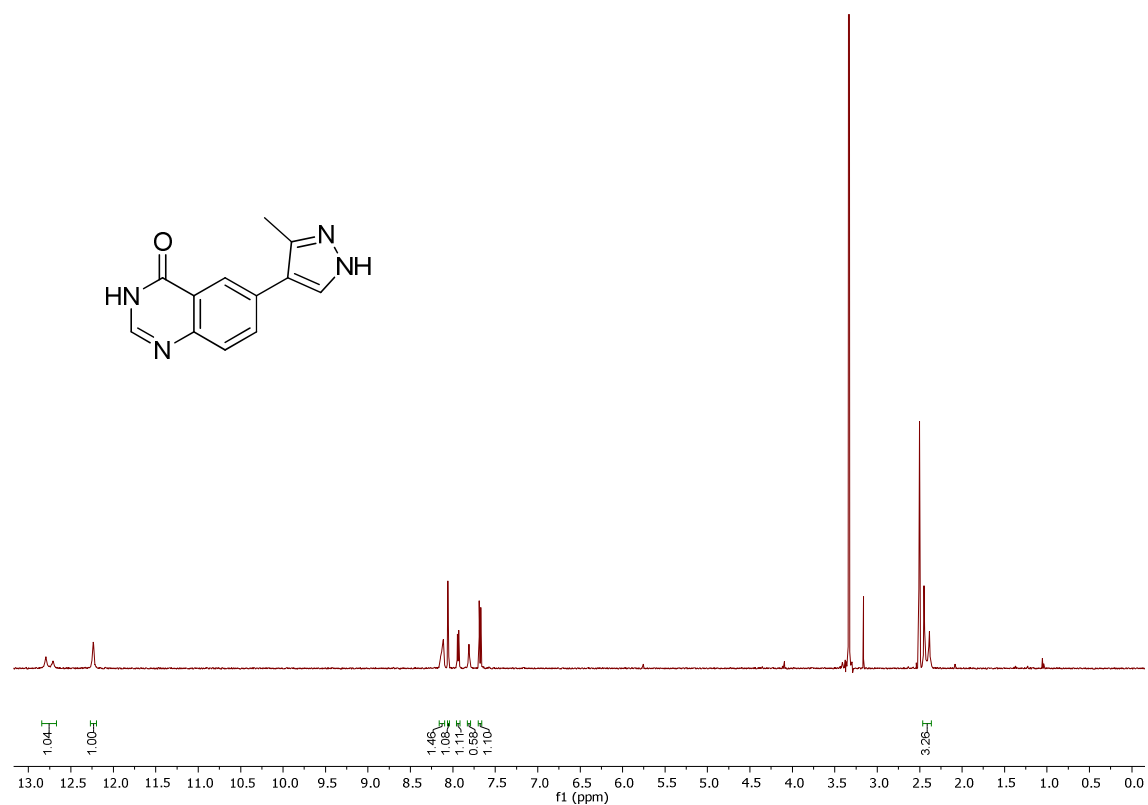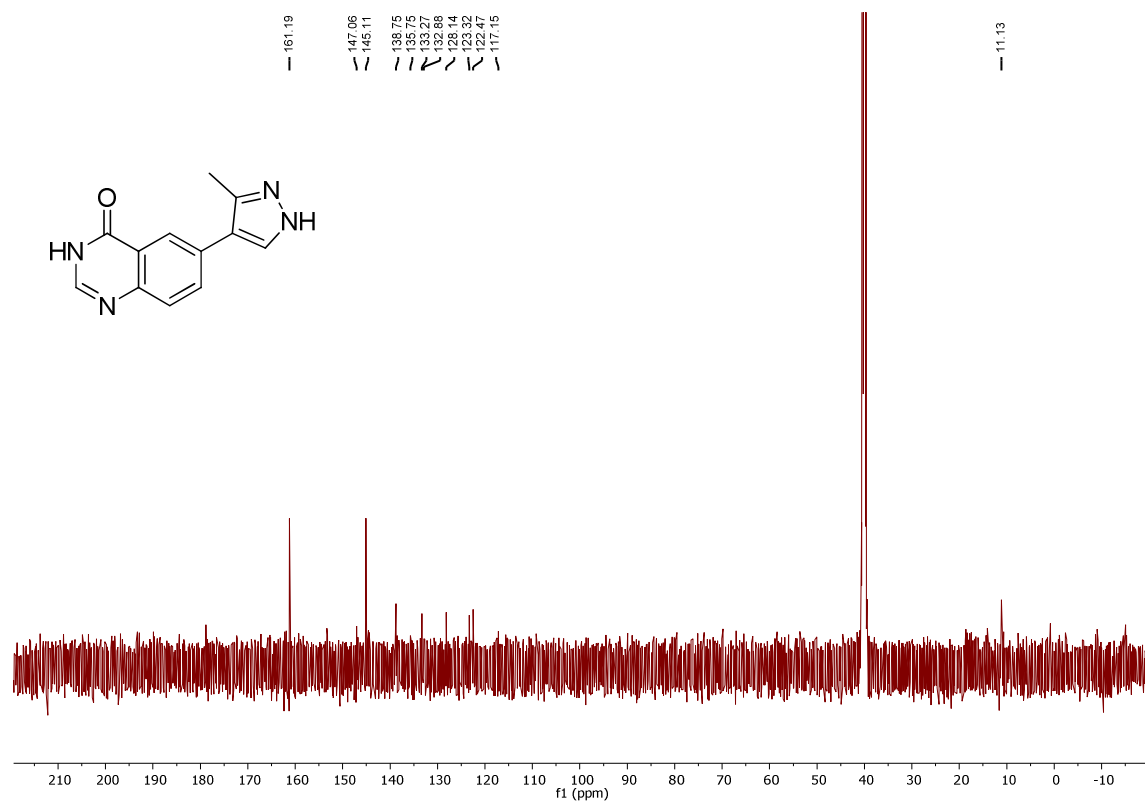

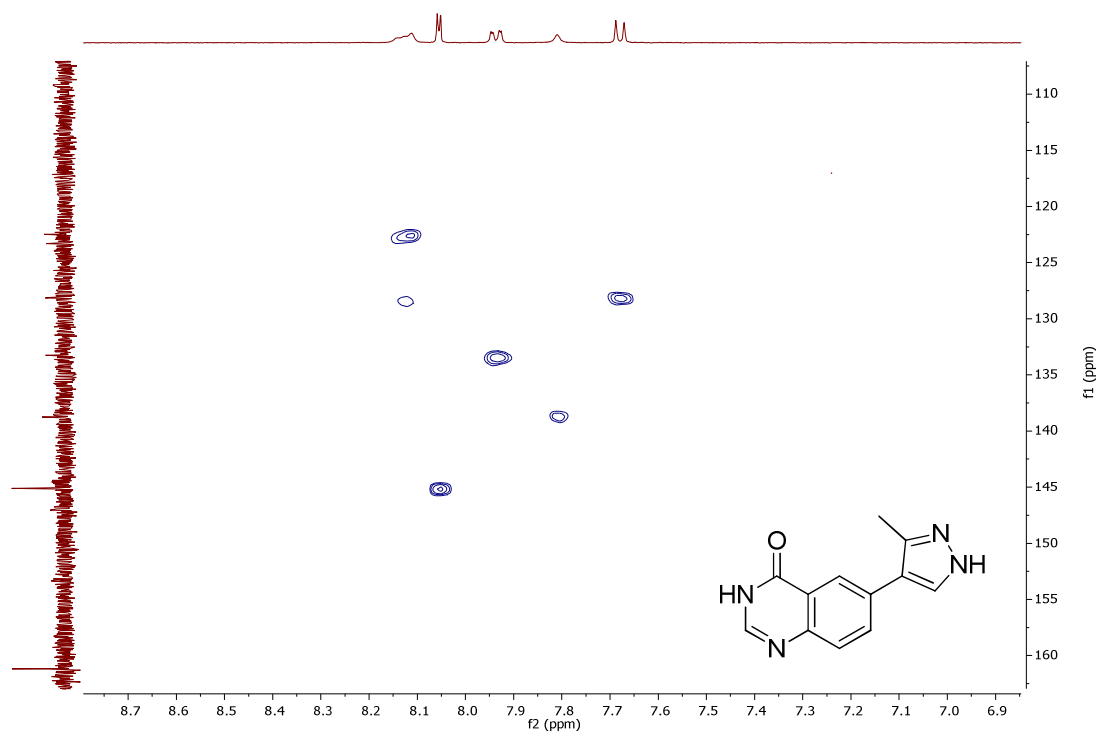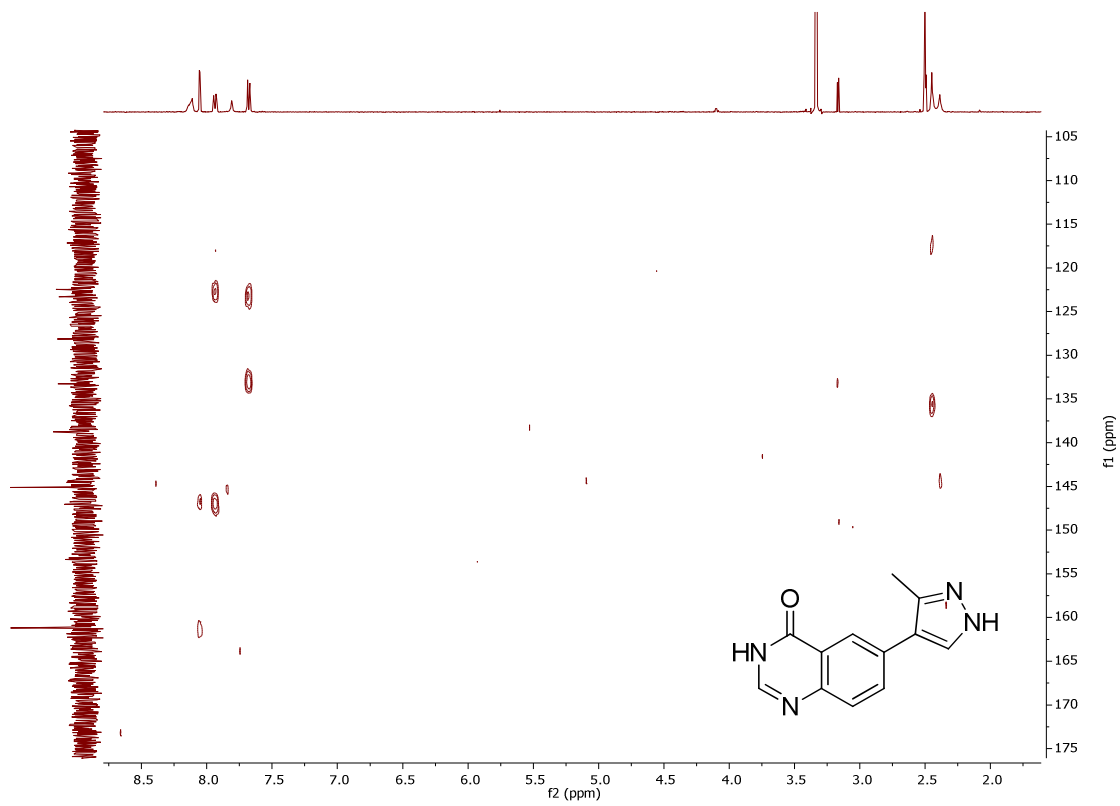

6-(3-Ethyl-1H-pyrazol-4-yl)quinazolin-4(3H)-one, 4

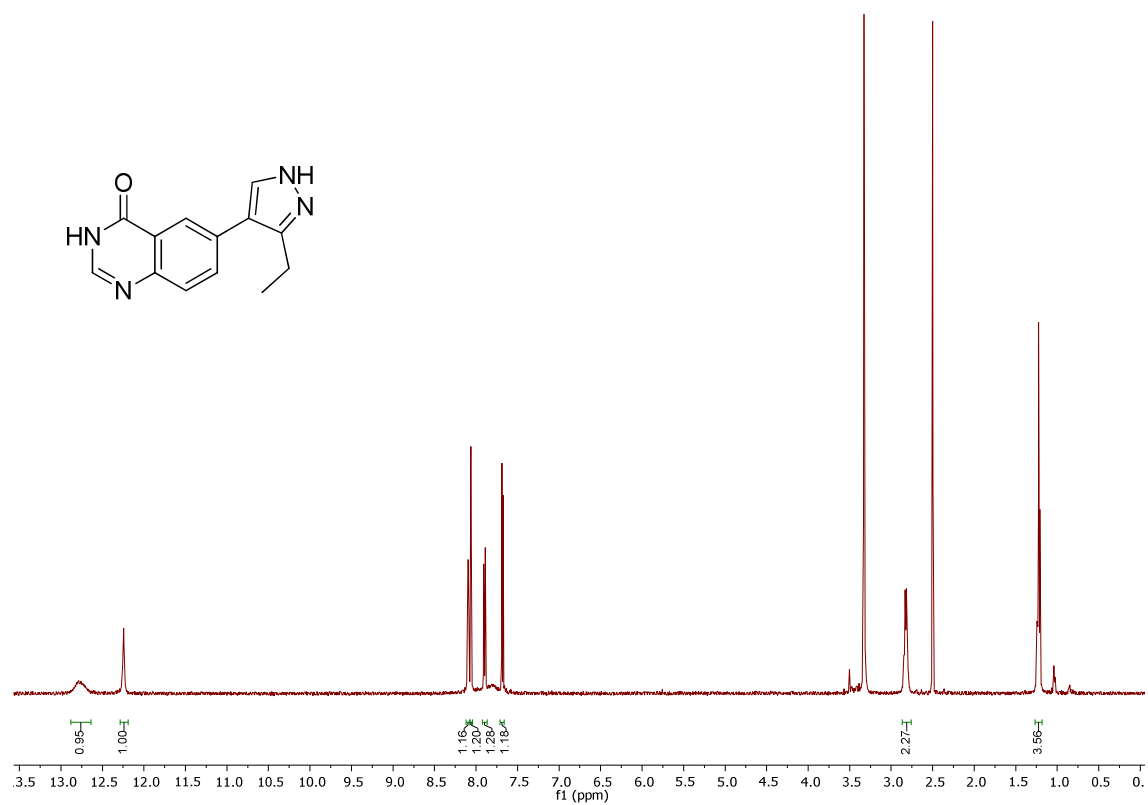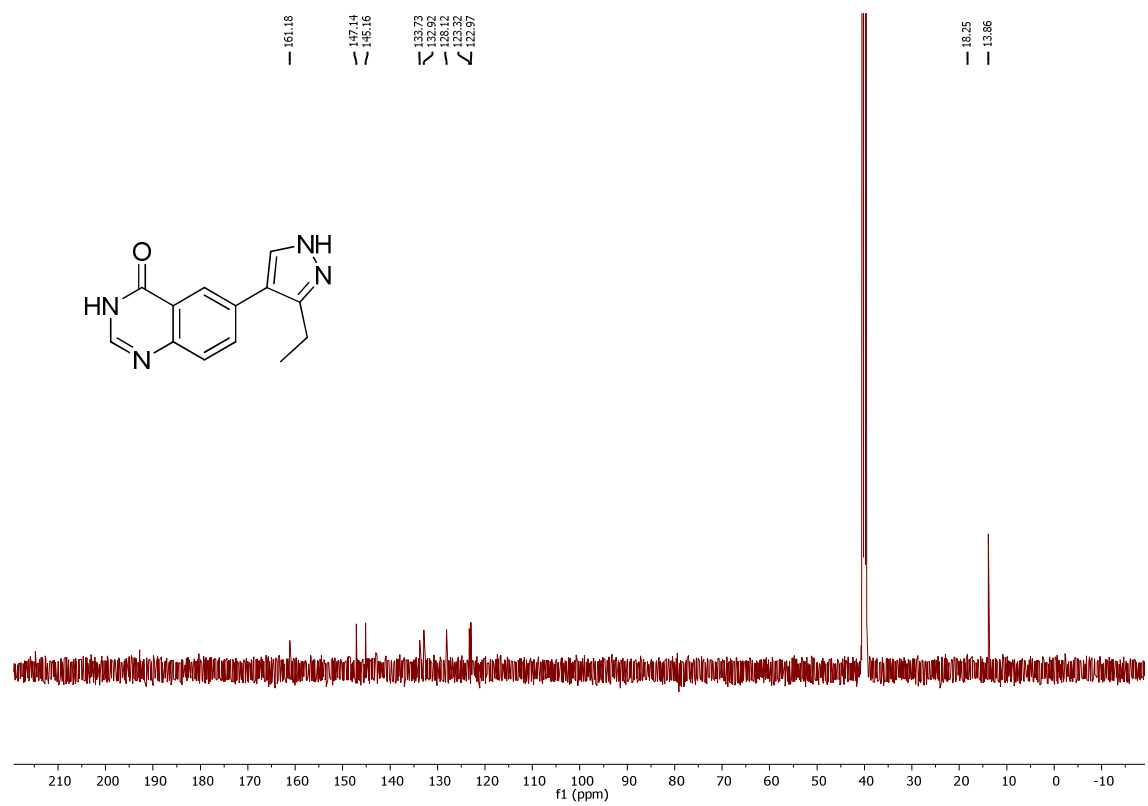

6-(3-Cyclopropyl-1H-pyrazol-4-yl)quinazolin-4(3H)-one, 5

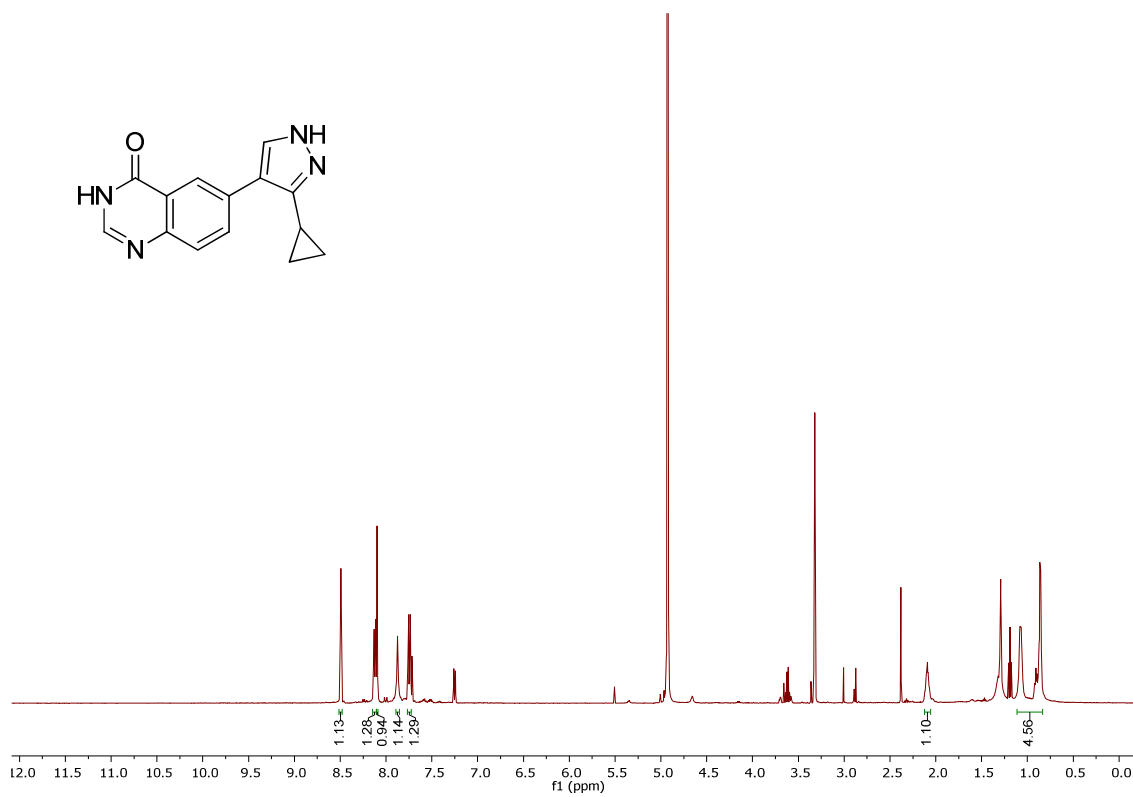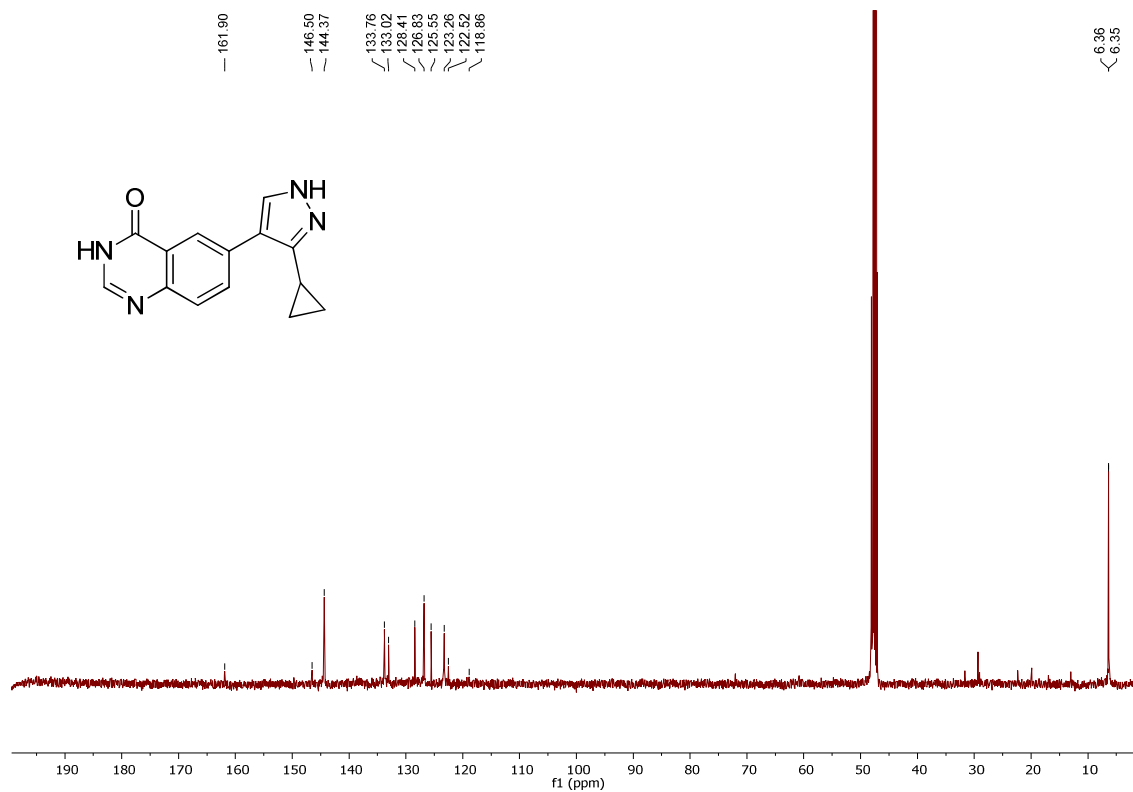

6-(3,5-Dimethyl-1H-pyrazol-4-yl)quinazolin-4(3H)-one, 6

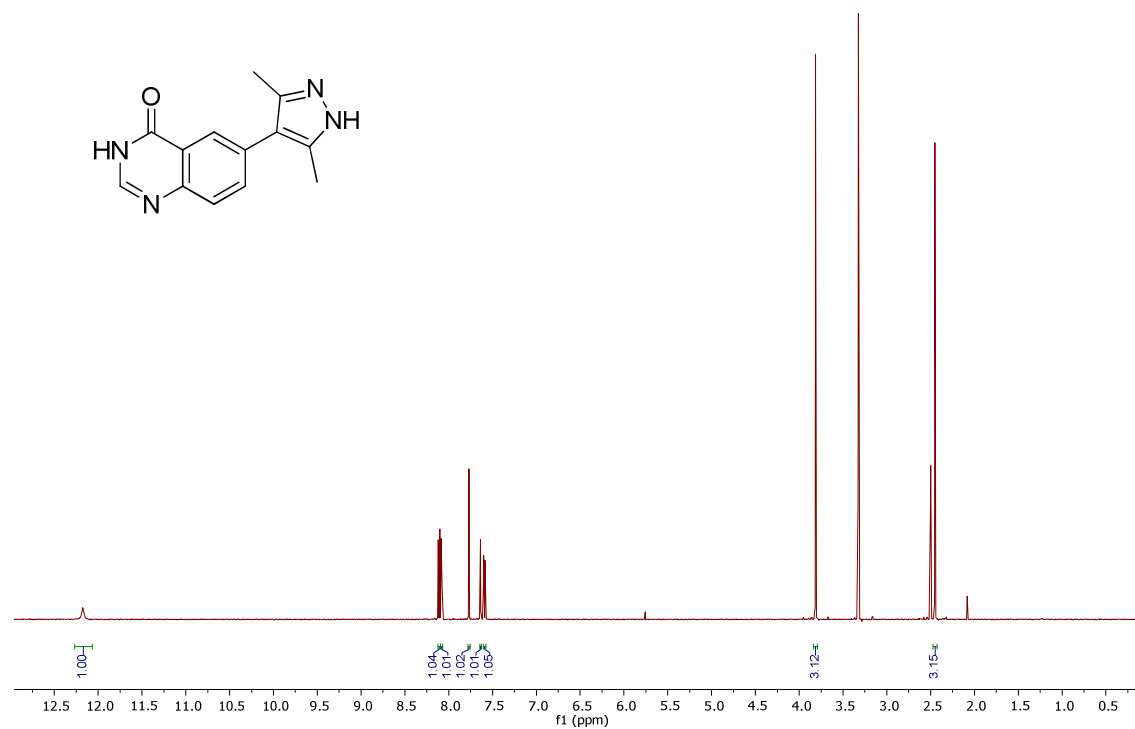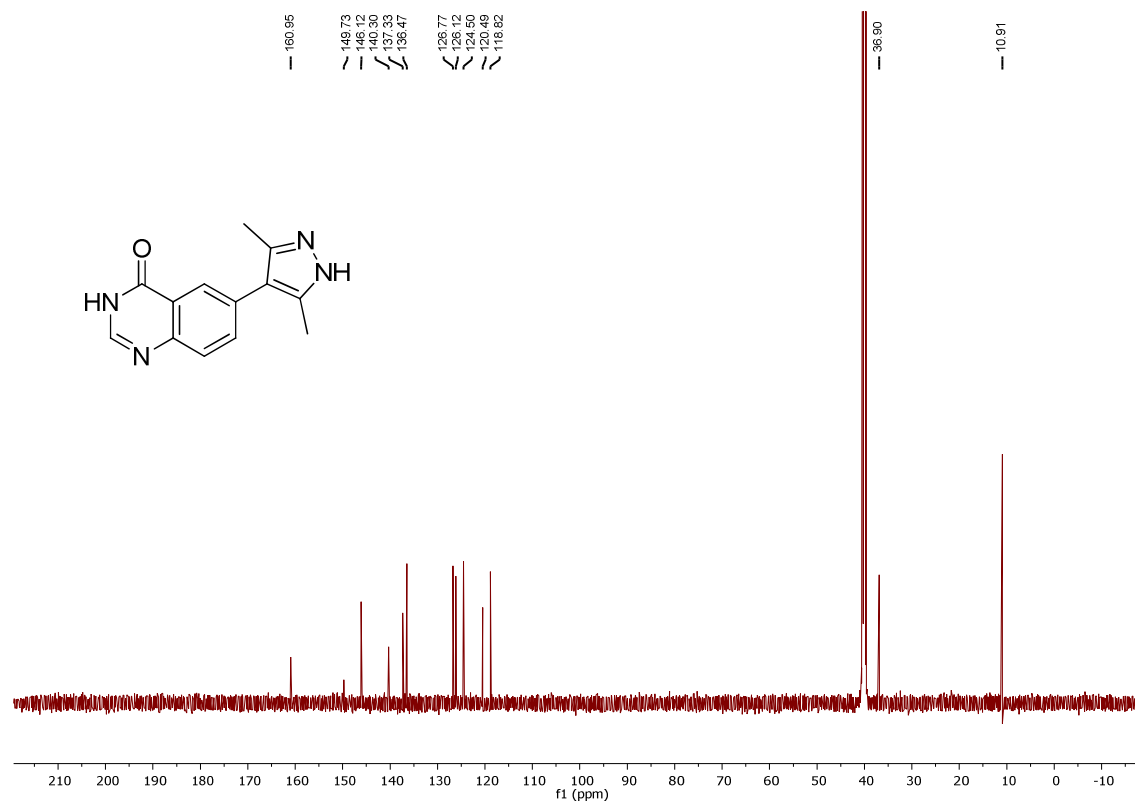



6-(Quinolin-4-yl)quinazolin-4(3H)-one, 7

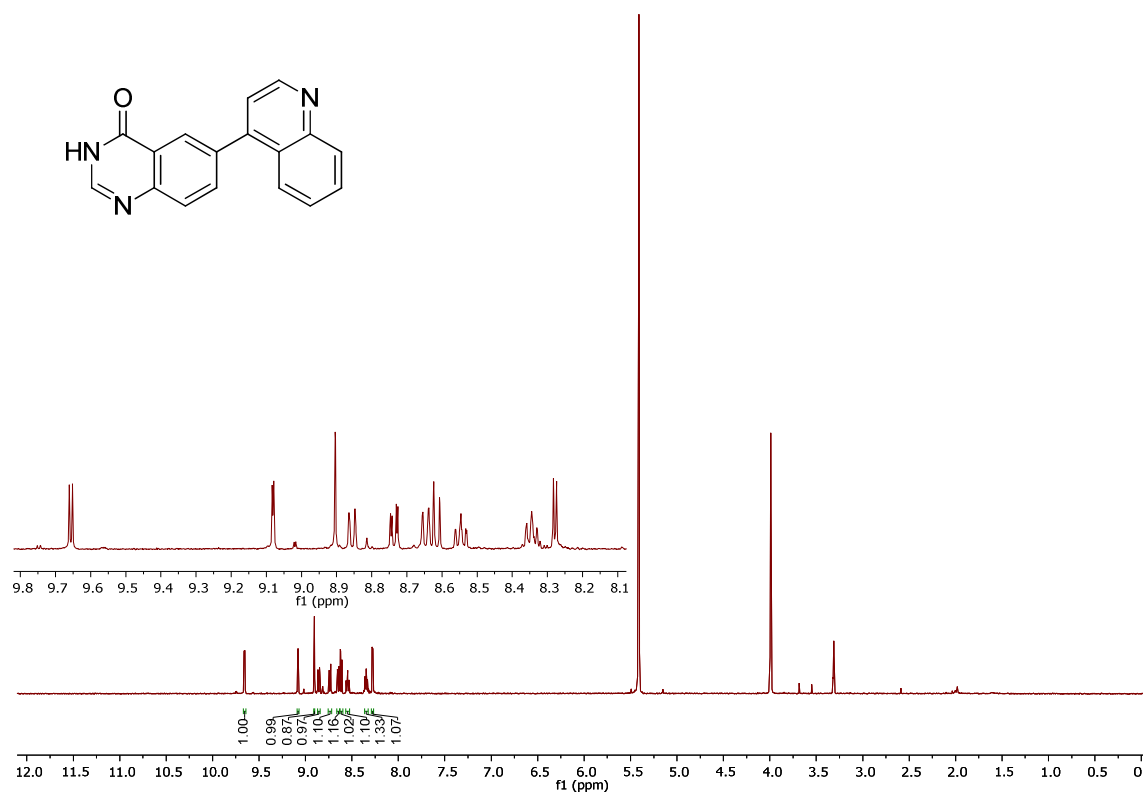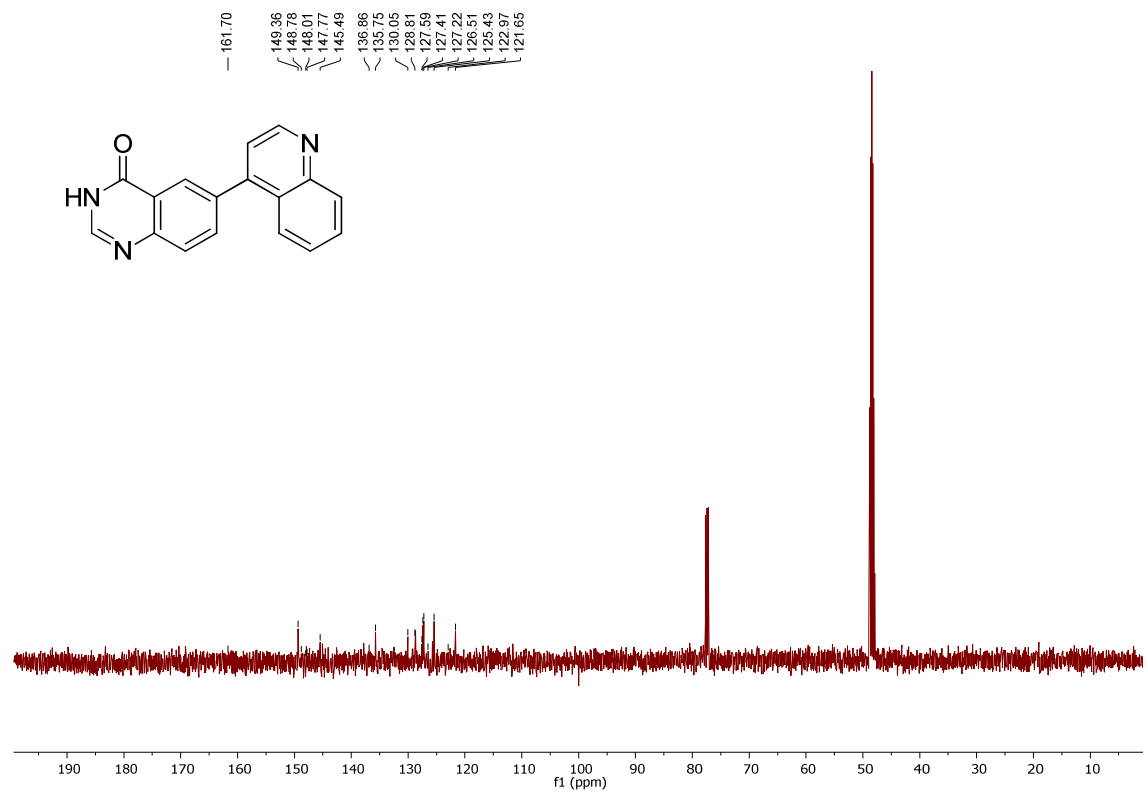

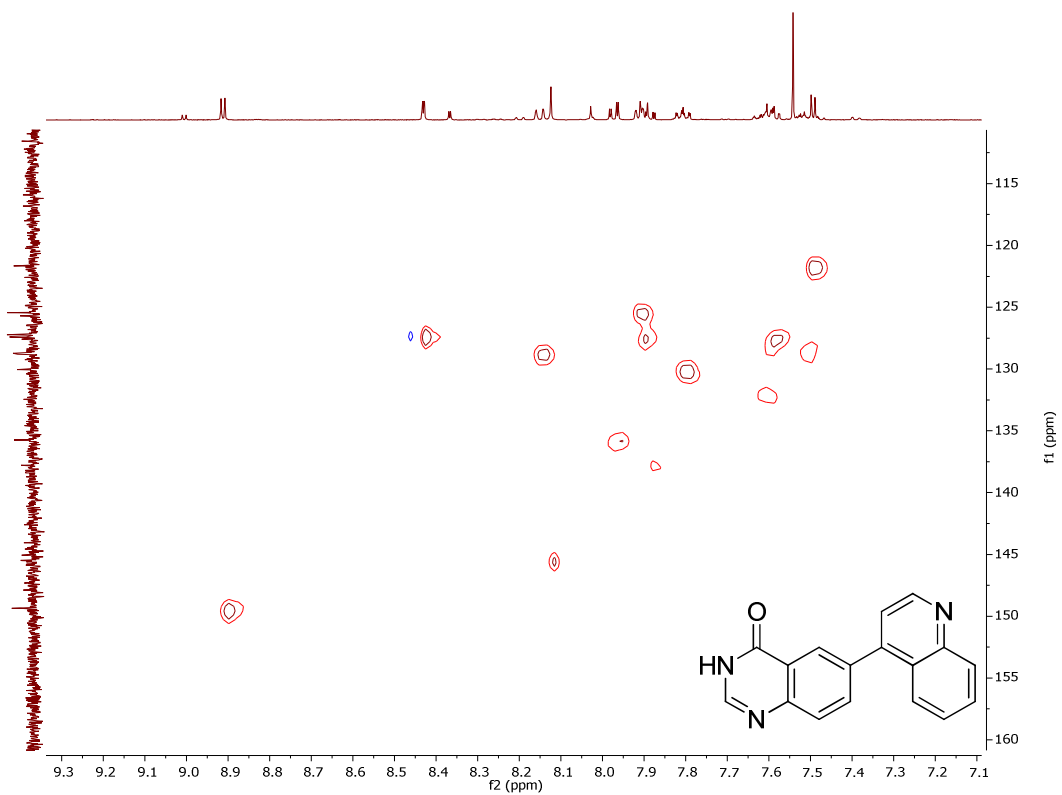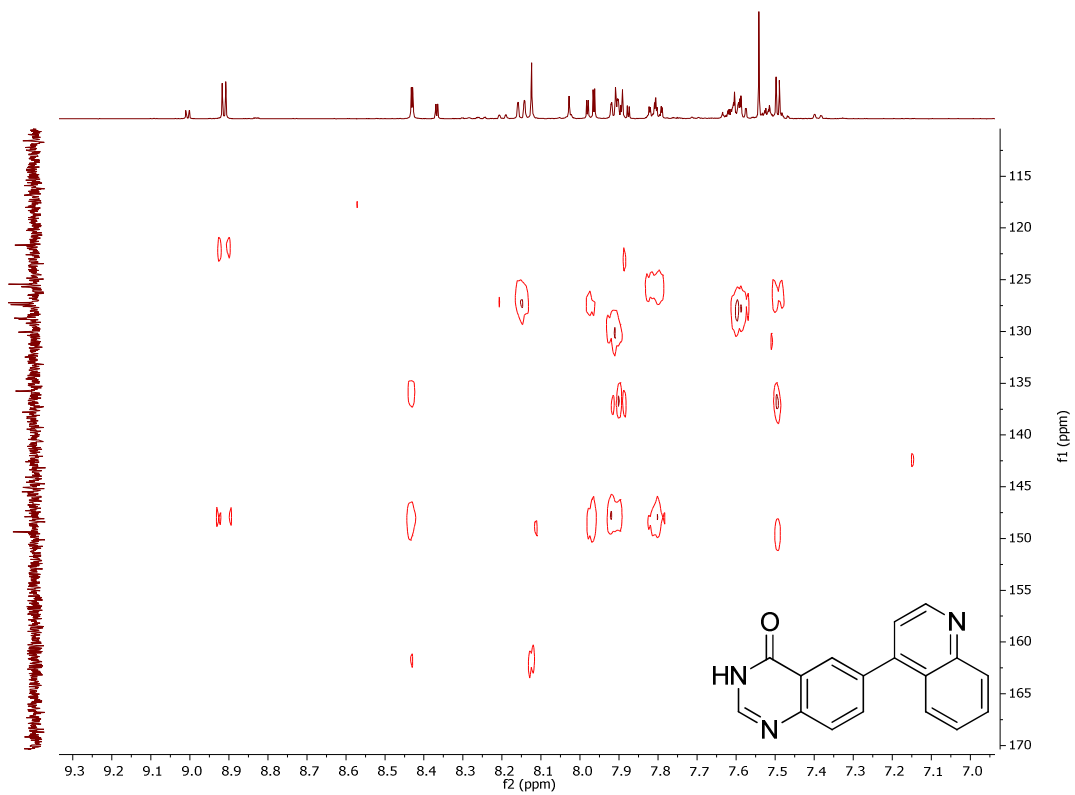

# 6-(Quinolin-5-yl)quinazolin-4(3H)-one, 8

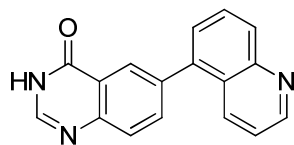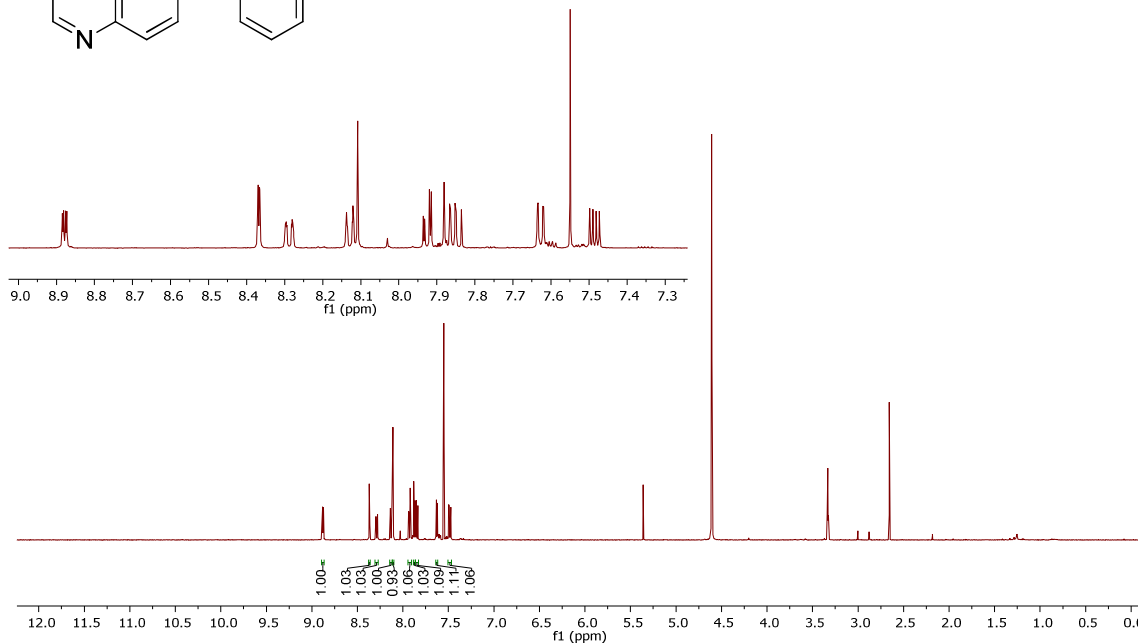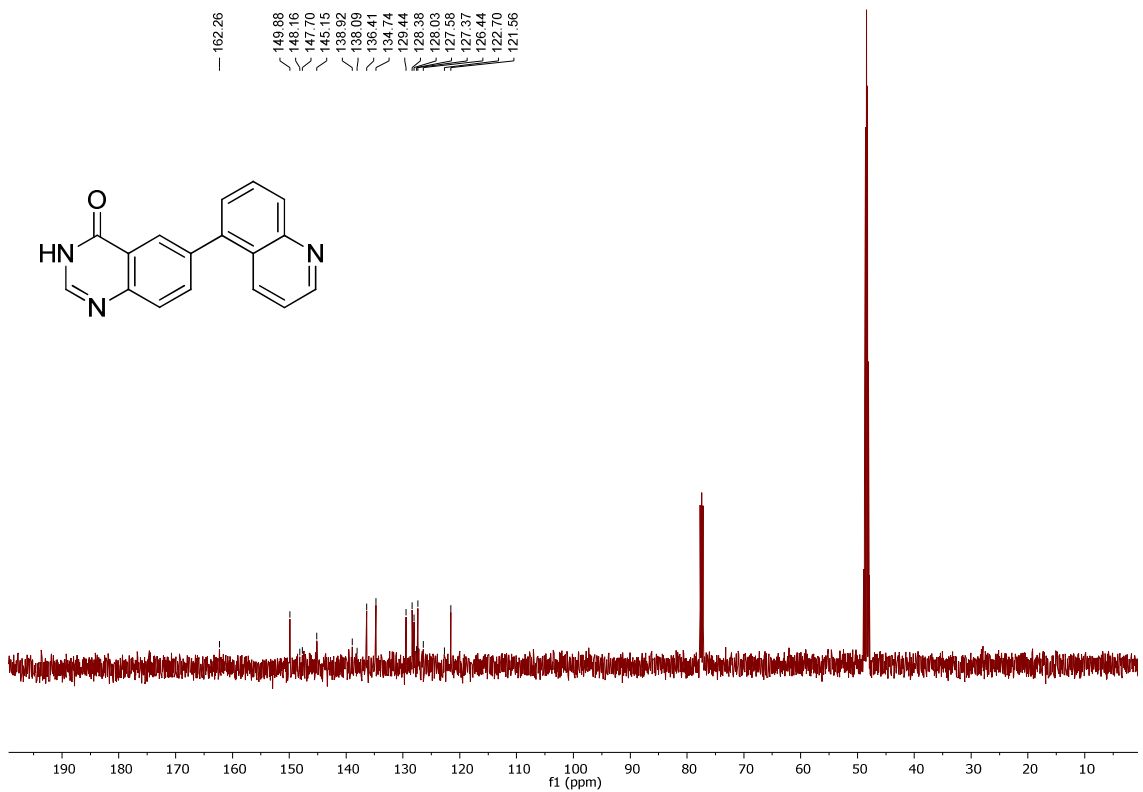

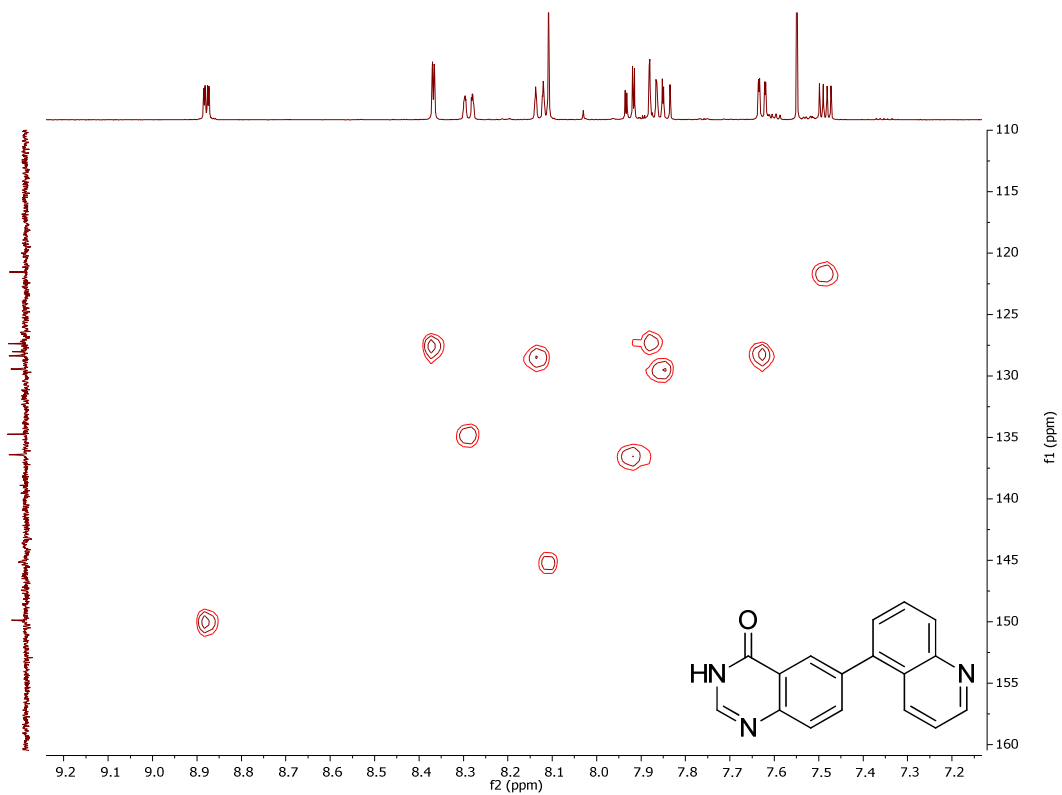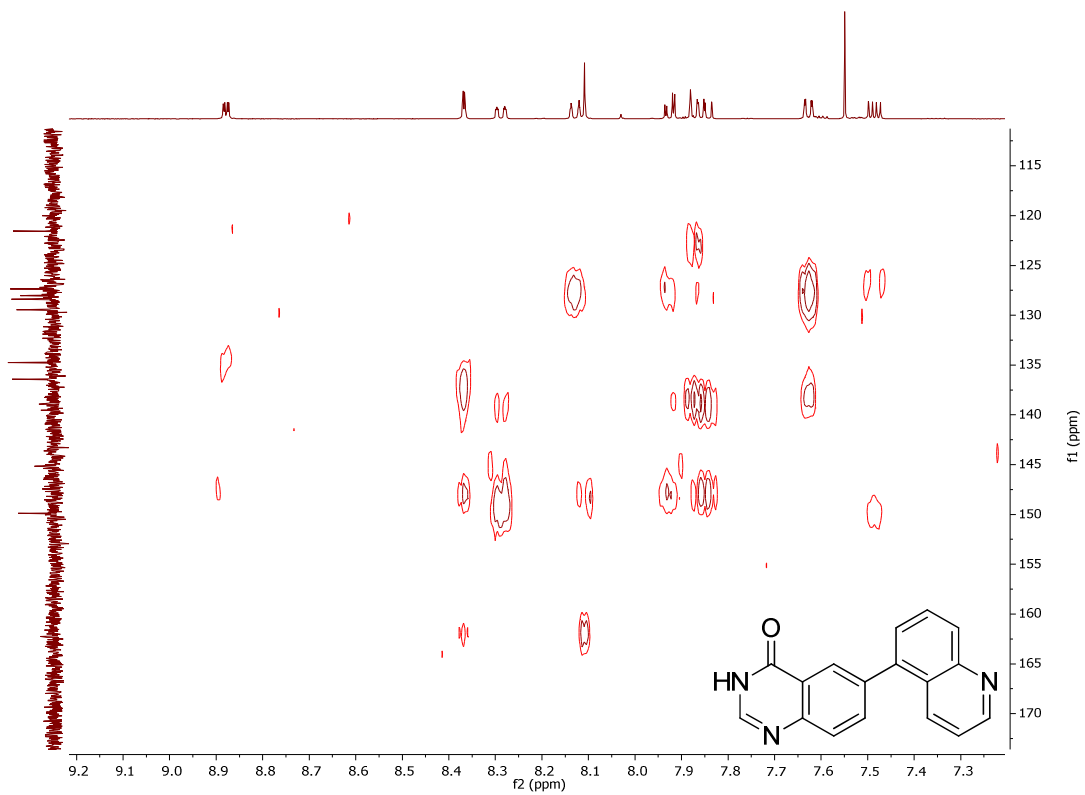

6-(Pyrazolo[1,5-*a*]pyridin-3-yl)quinazolin-4(3*H*)-one, 9

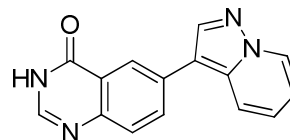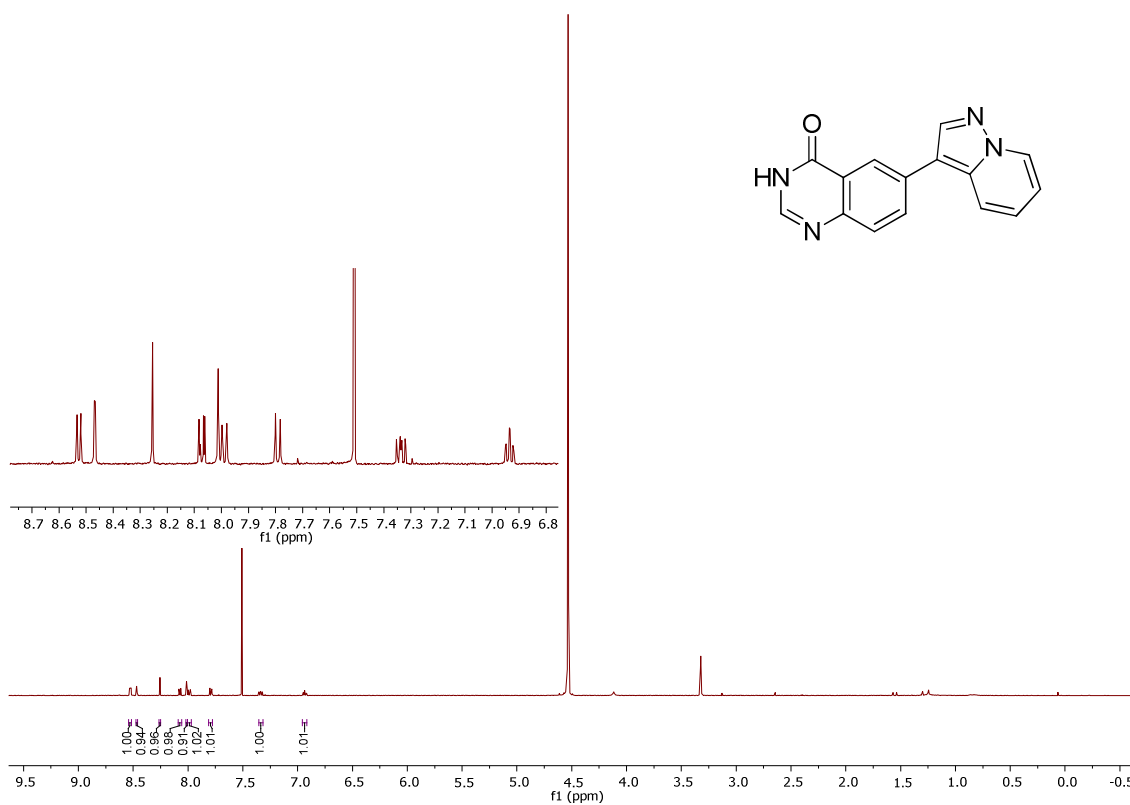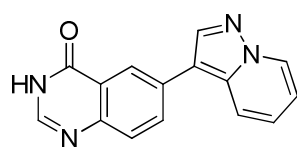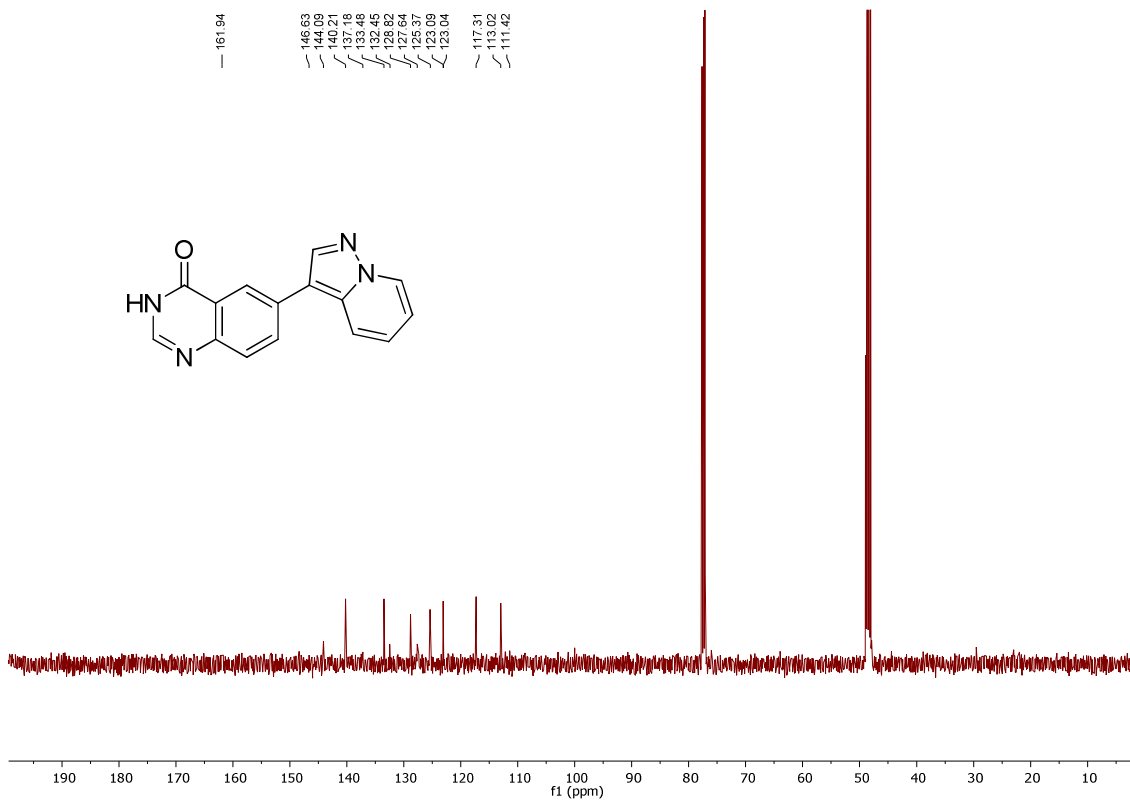

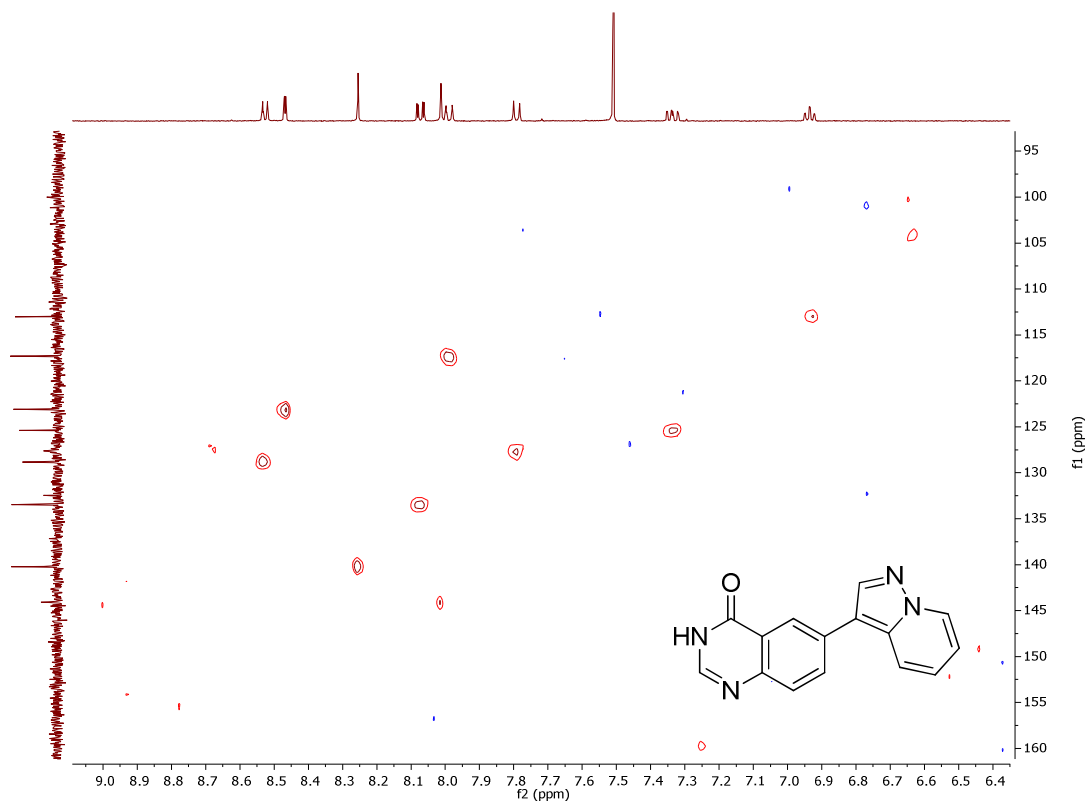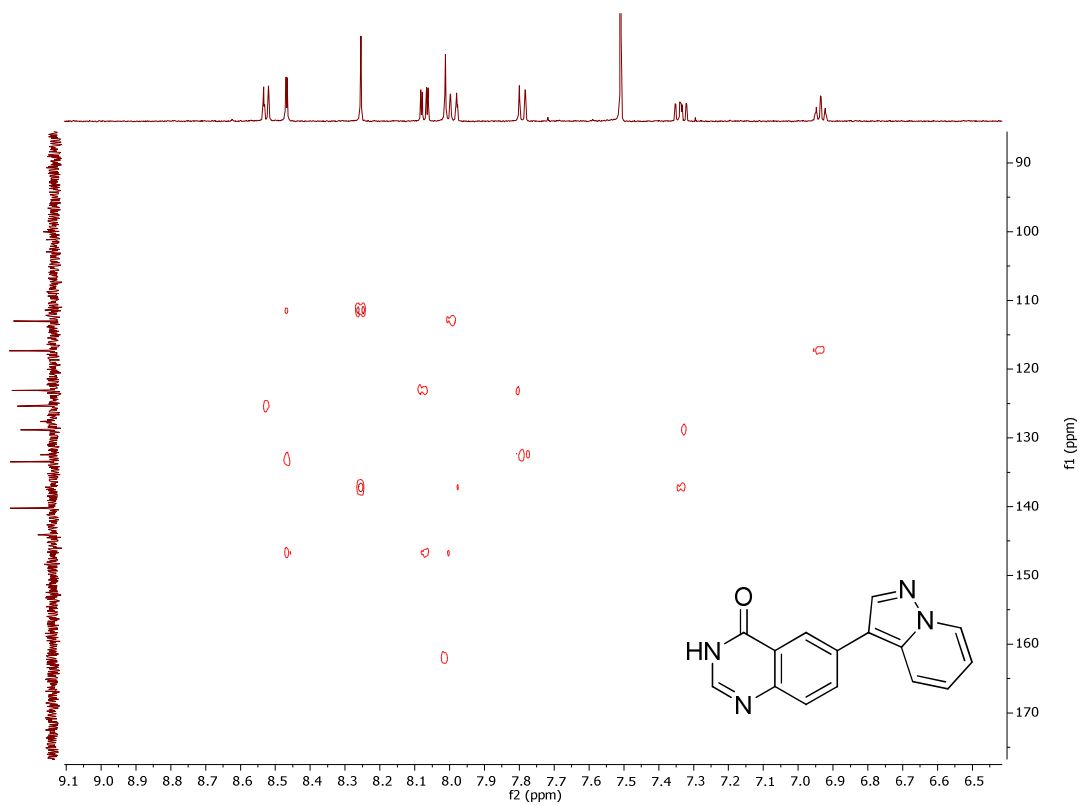

# 5-Methyl-6-(quinolin-4-yl)quinazolin-4(3H)-one, 10

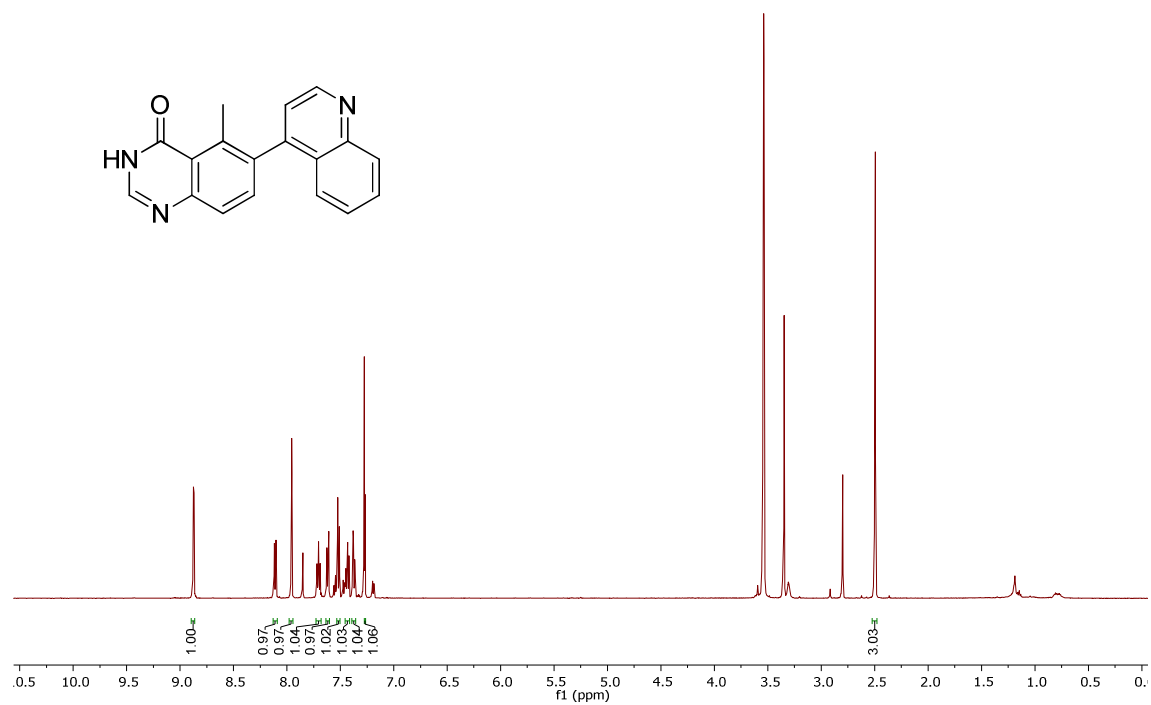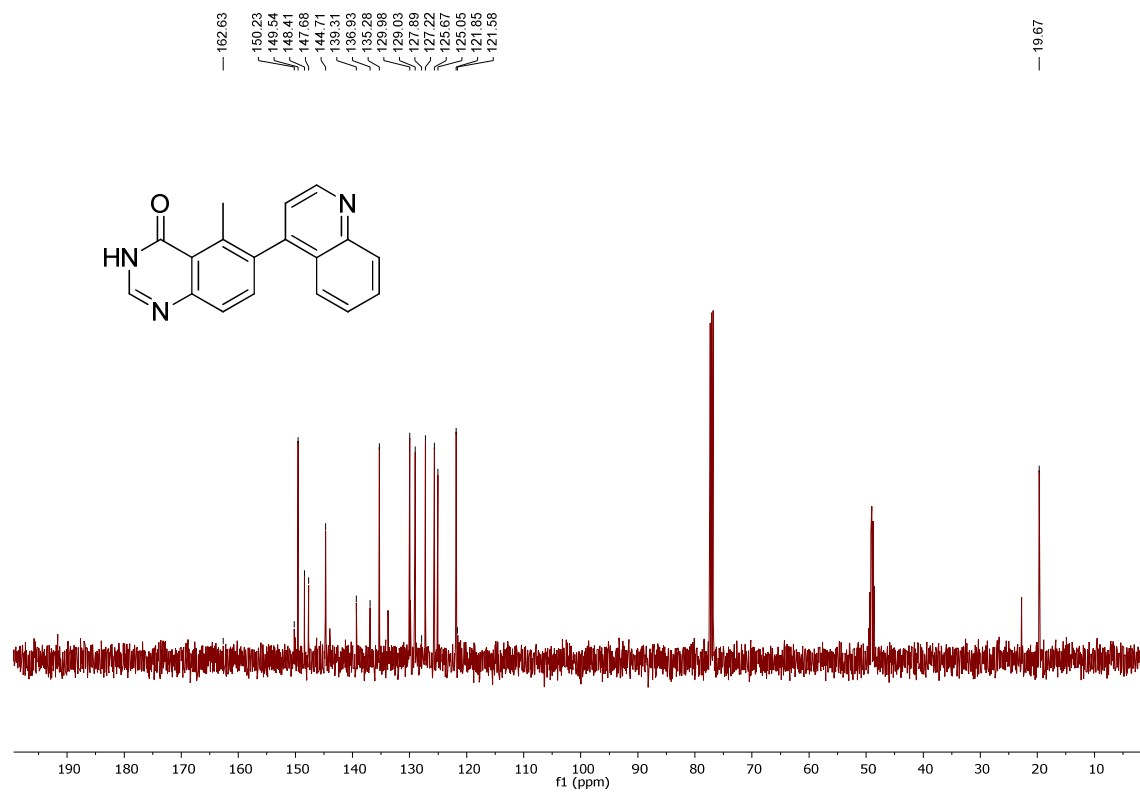

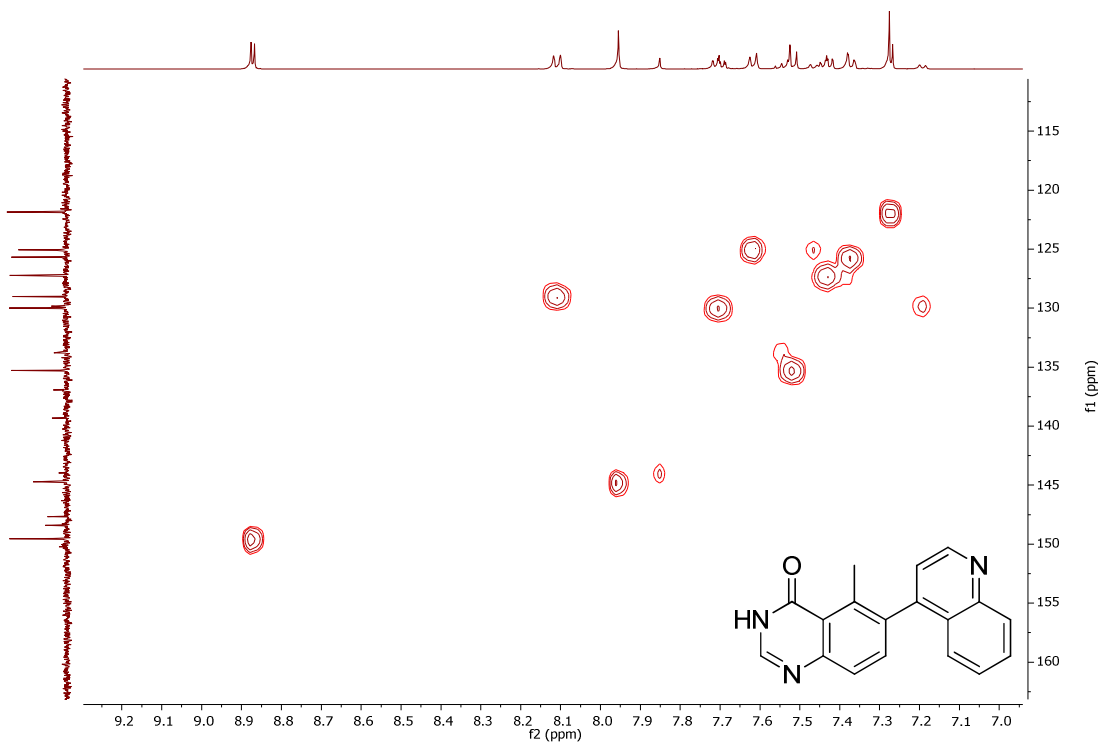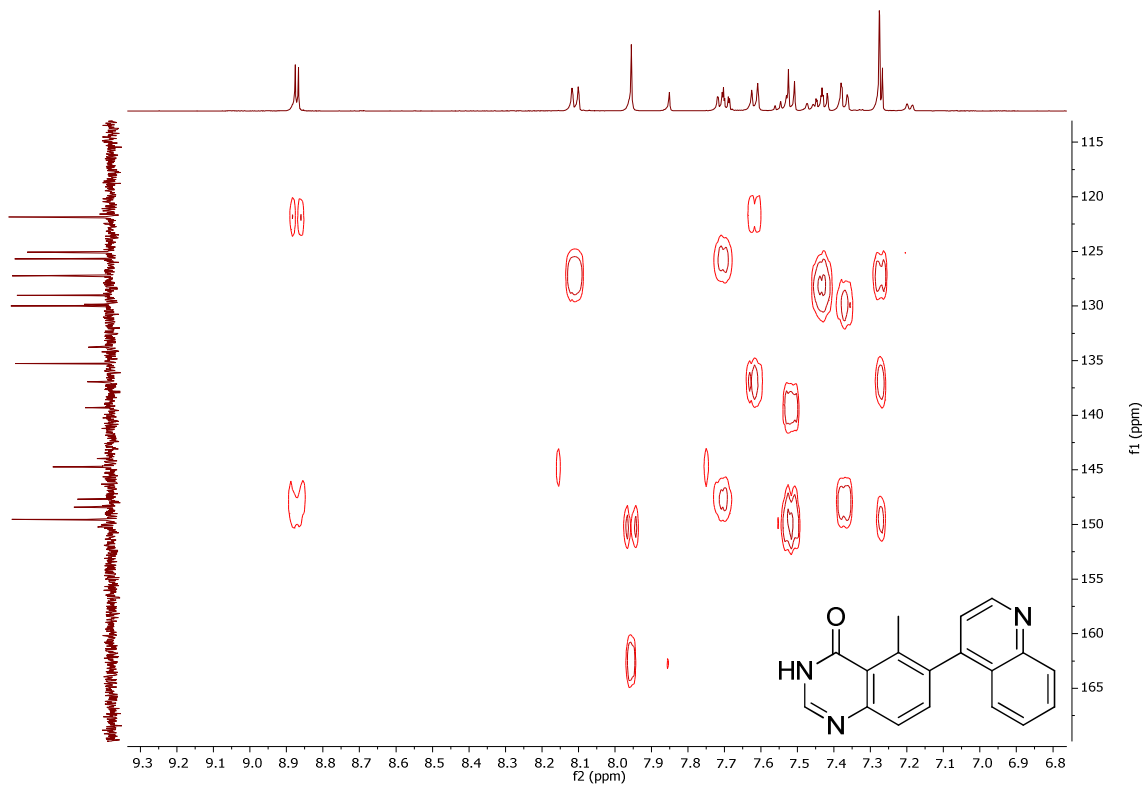



# 5-Methyl-6-(quinolin-5-yl)quinazolin-4(3H)-one, 11

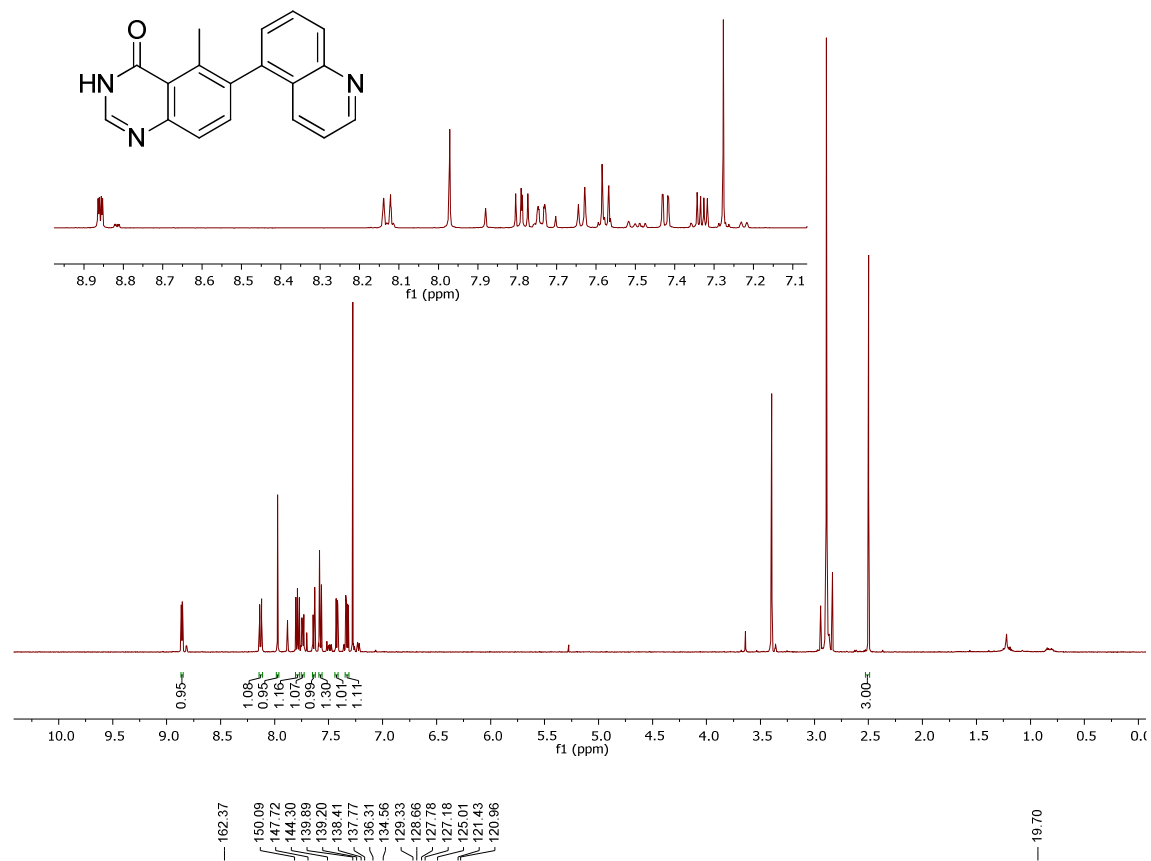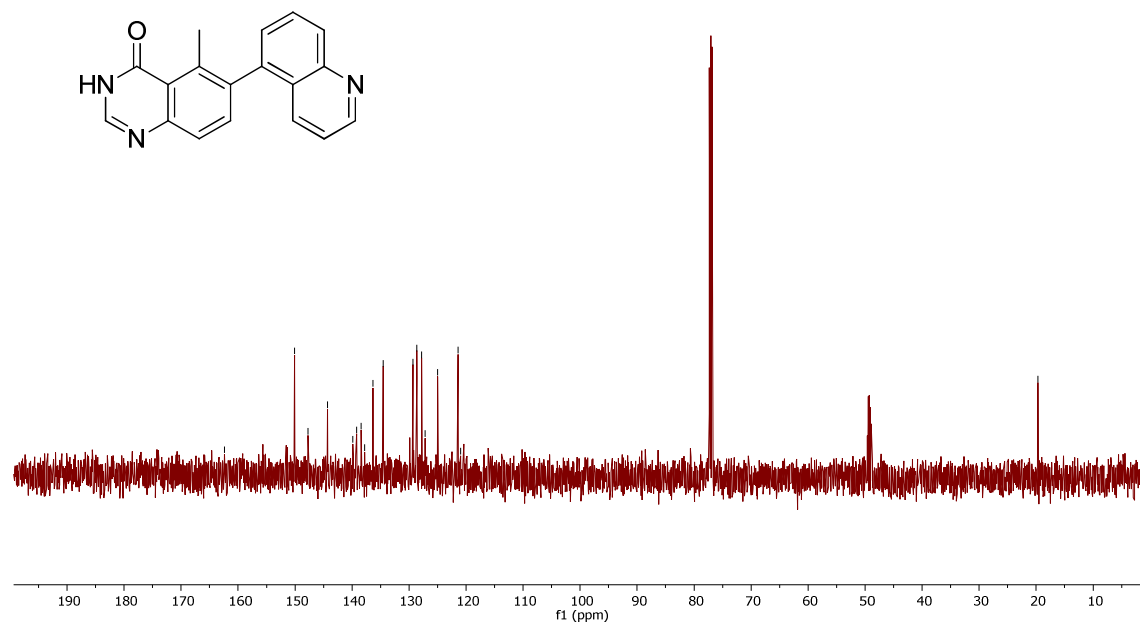

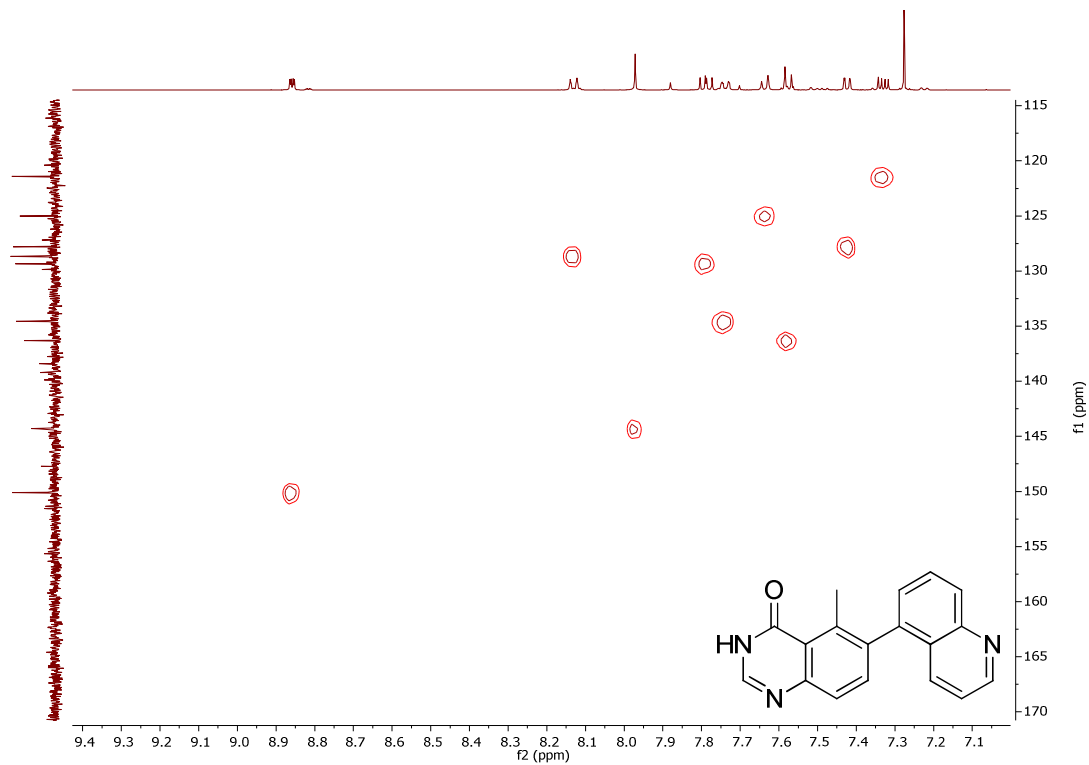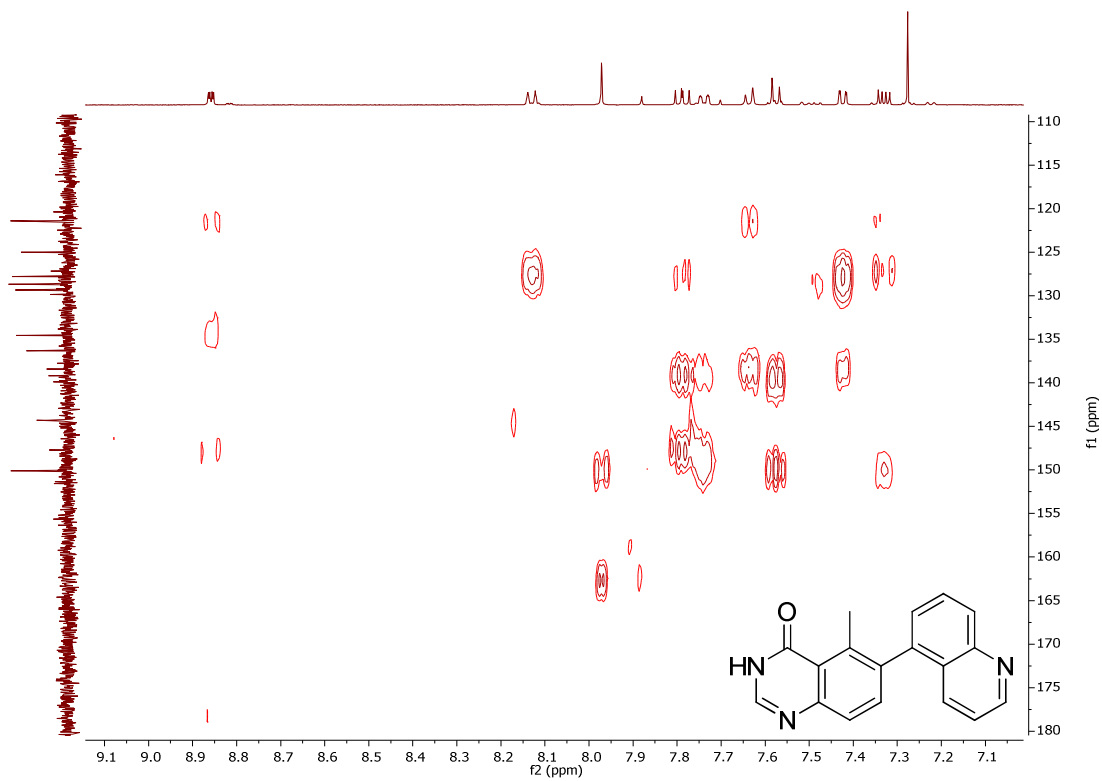

### 3-Methyl-6-(quinolin-4-yl)quinazolin-4(3H)-one, 12

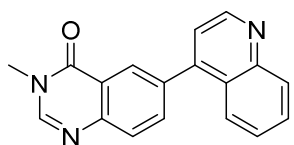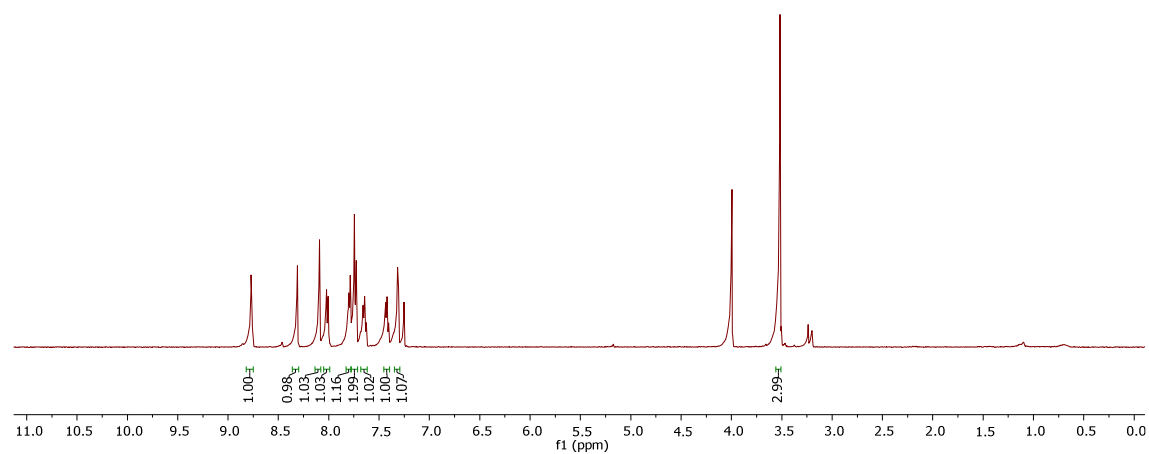

164.70  
152.61  
152.95  
151.13  
151.08  
150.71  
140.11  
138.67  
133.17  
132.09  
130.65  
130.54  
130.48  
129.61  
128.53  
125.05  
124.78  
37.32

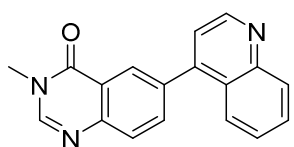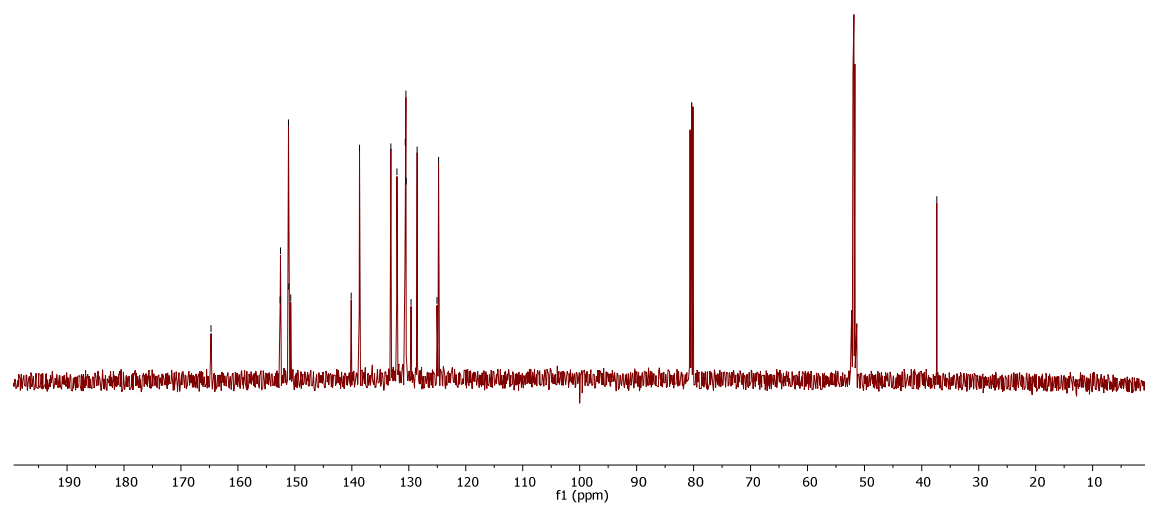

### 3-Methyl-6-(quinolin-5-yl)quinazolin-4(3H)-one, 13

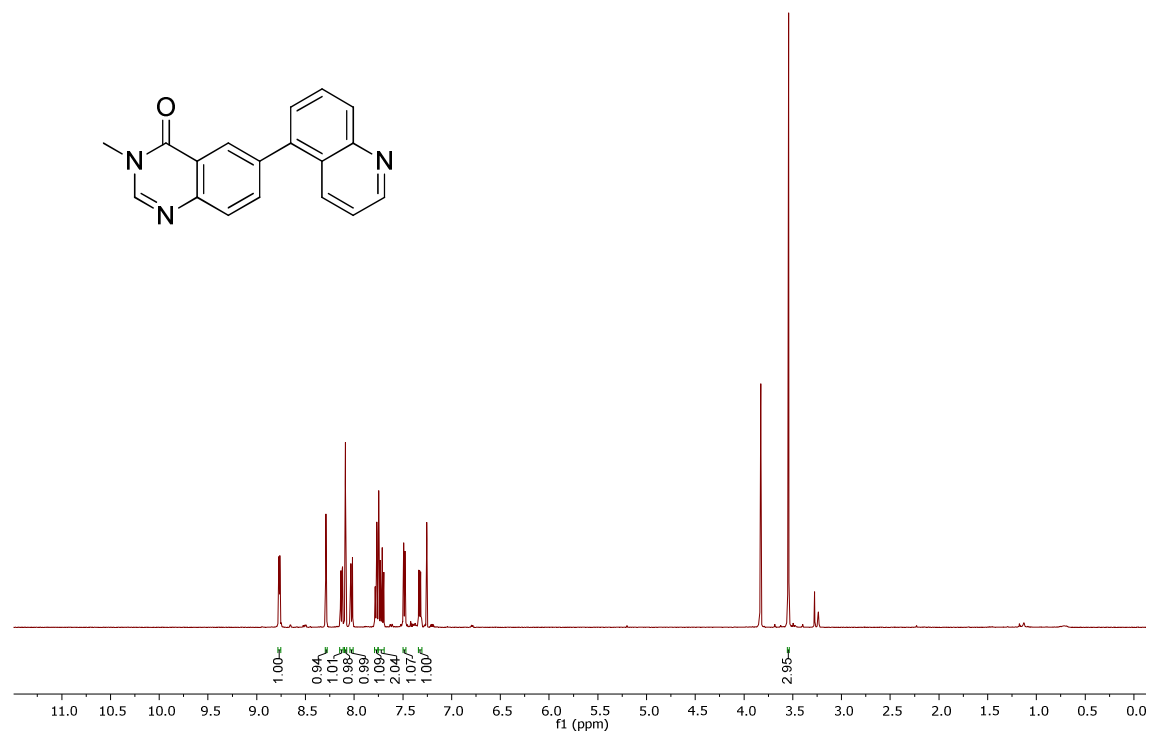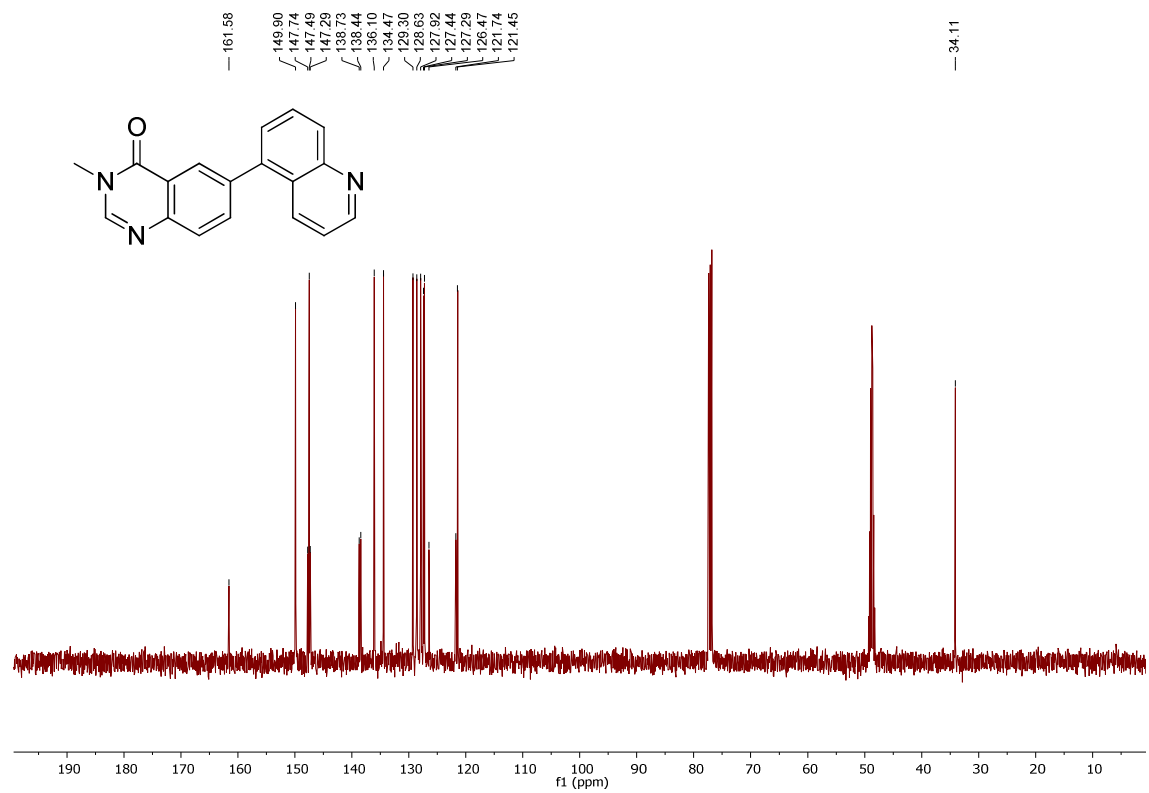

# 2-Methyl-6-(quinolin-4-yl)quinazolin-4(3H)-one, 14

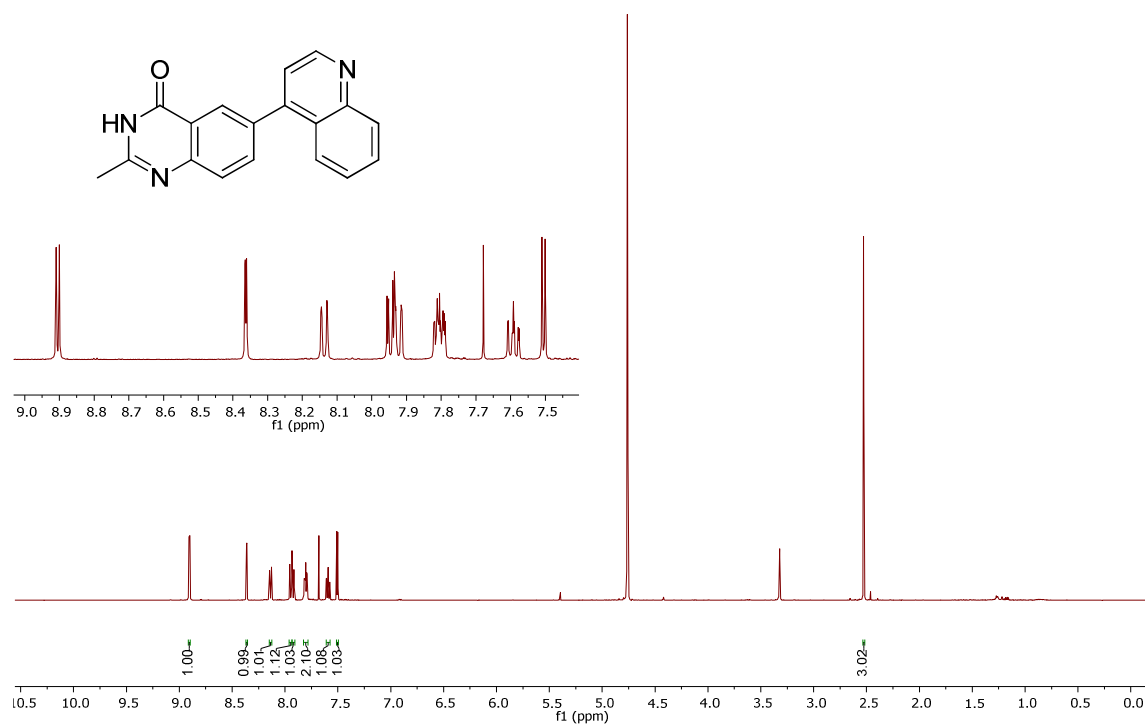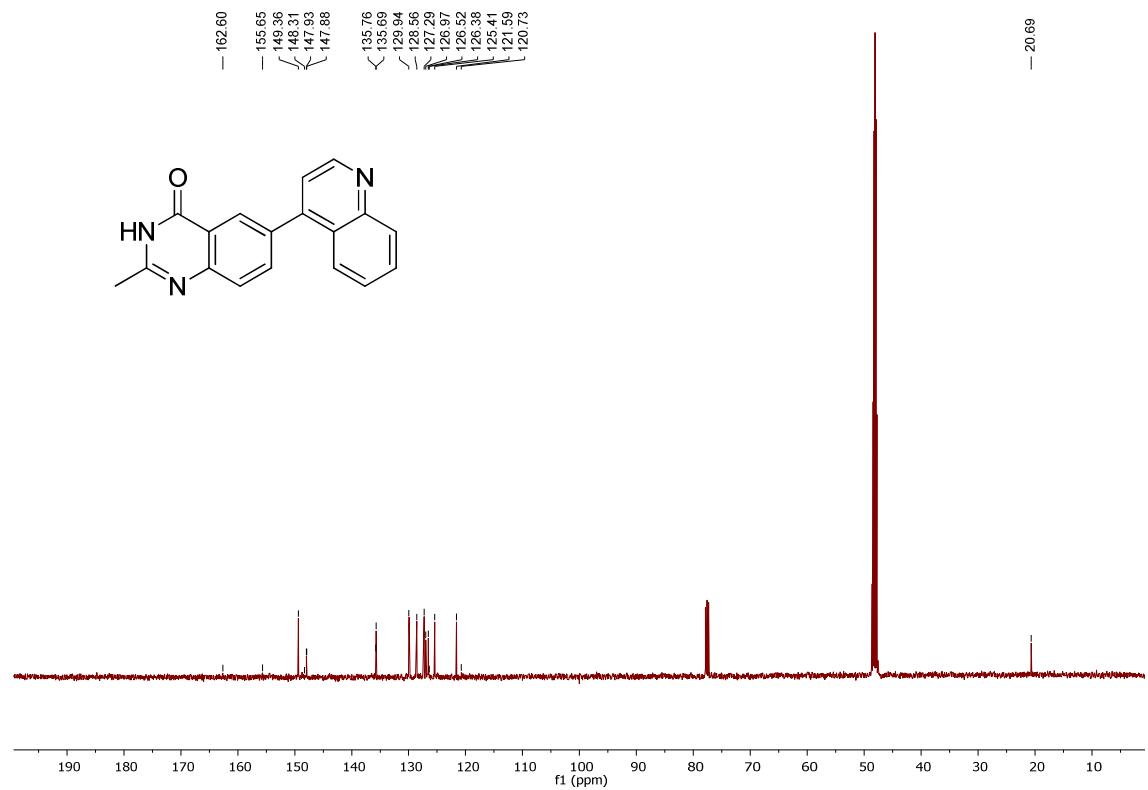

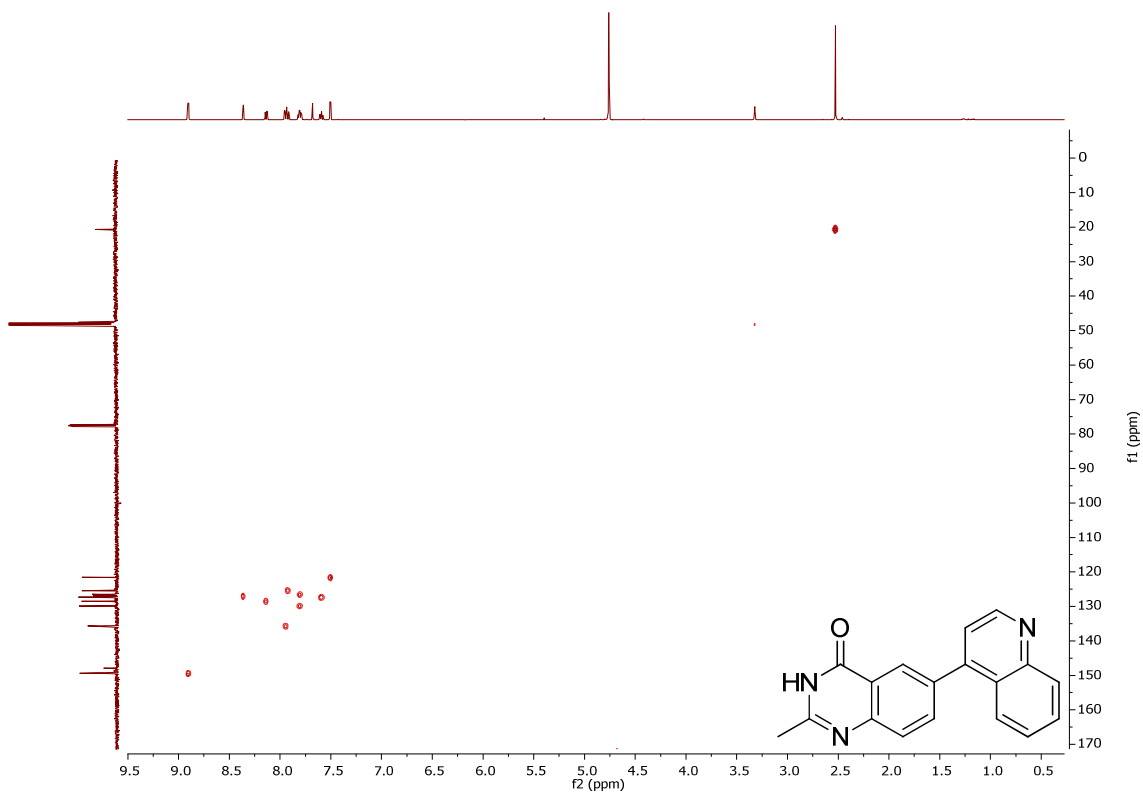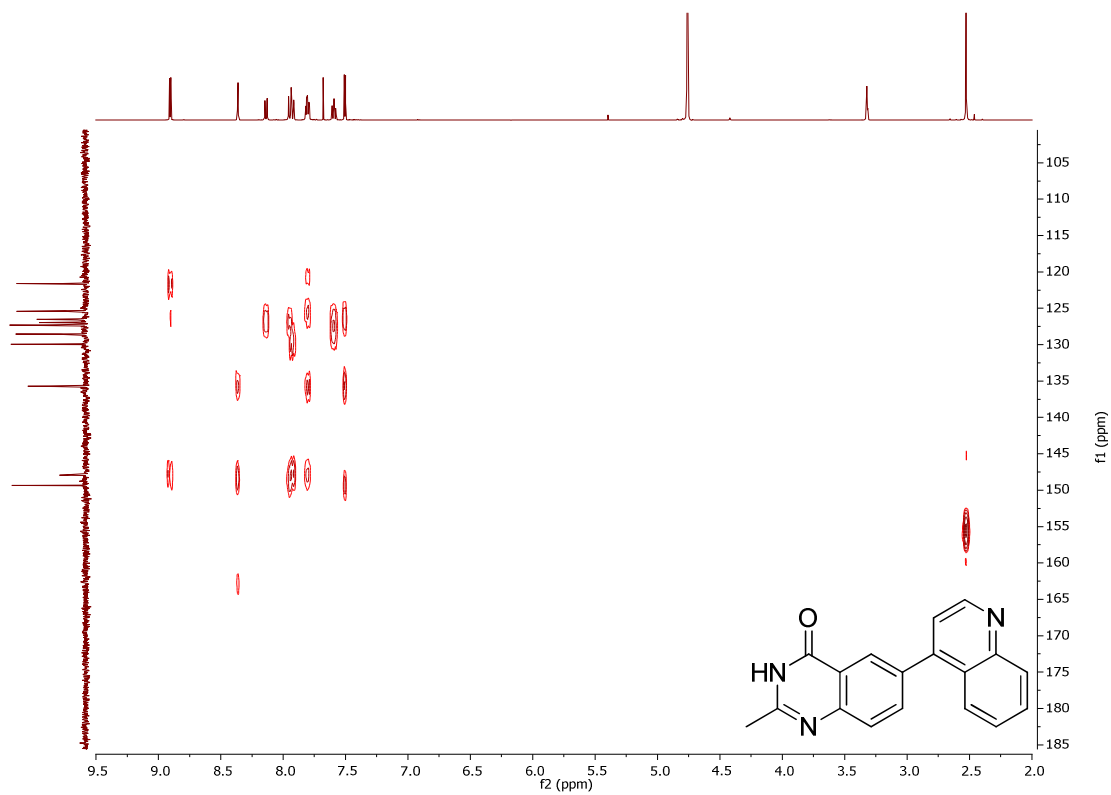

2-Methyl-6-(quinolin-5-yl)quinazolin-4(3H)-one, 15

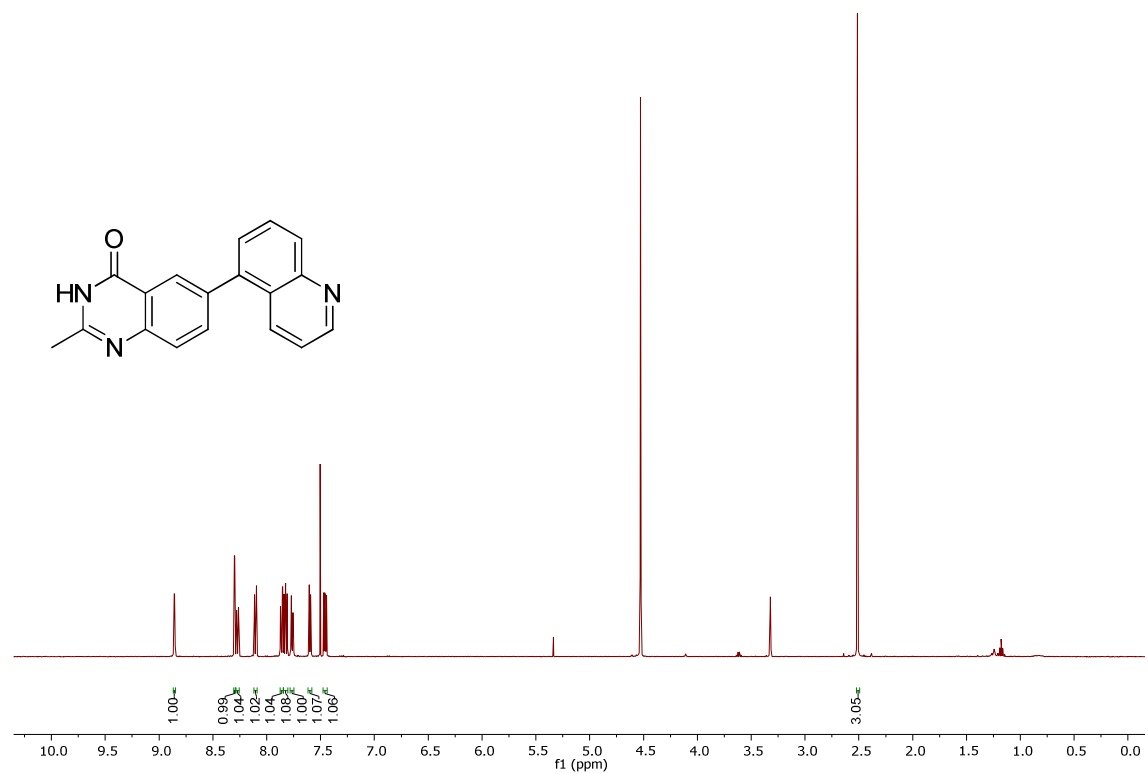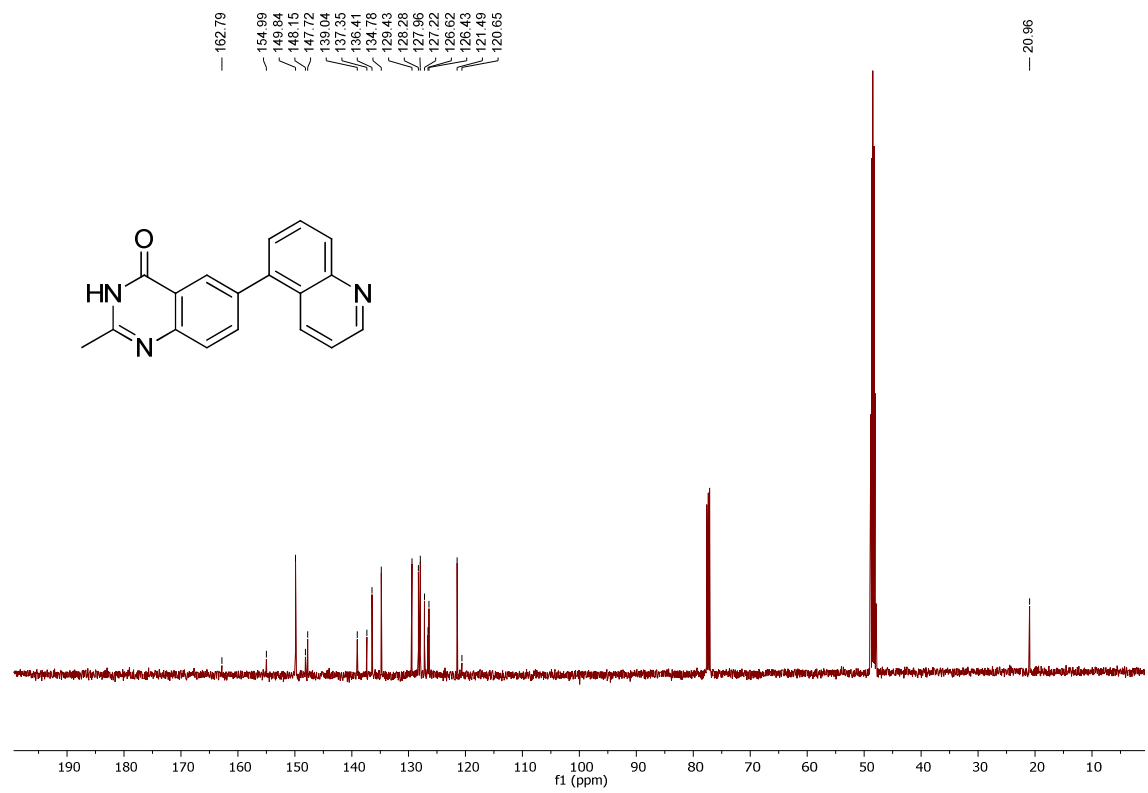

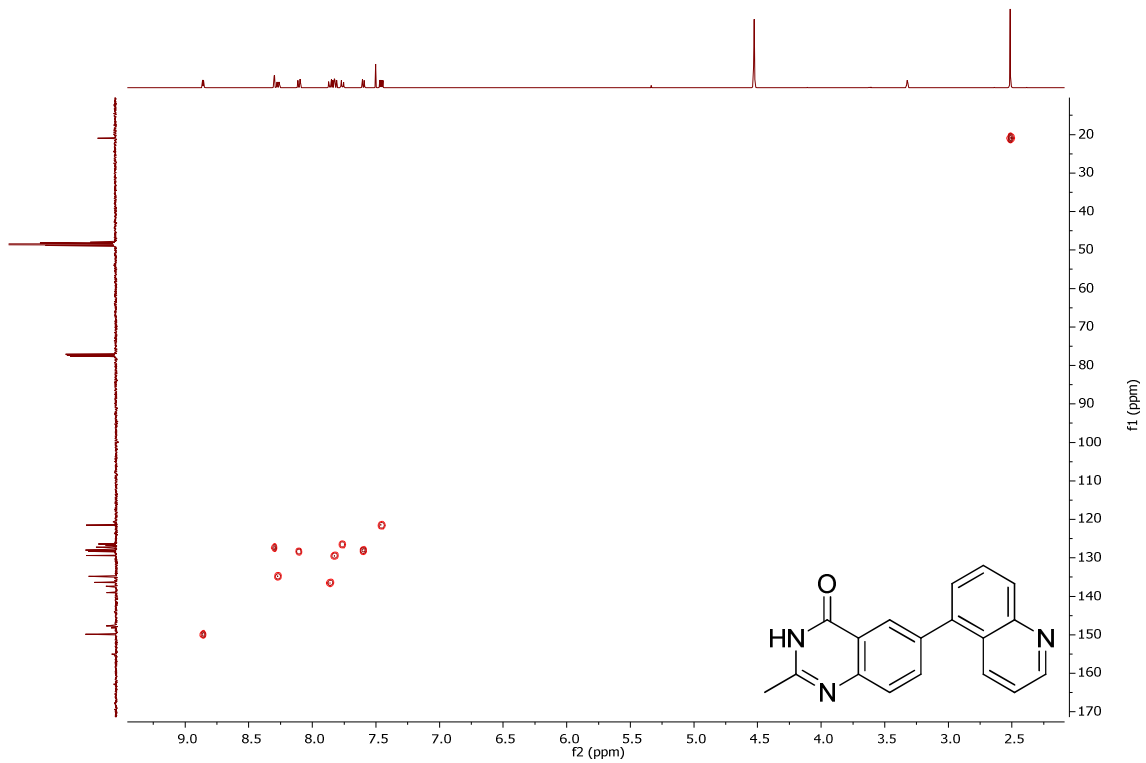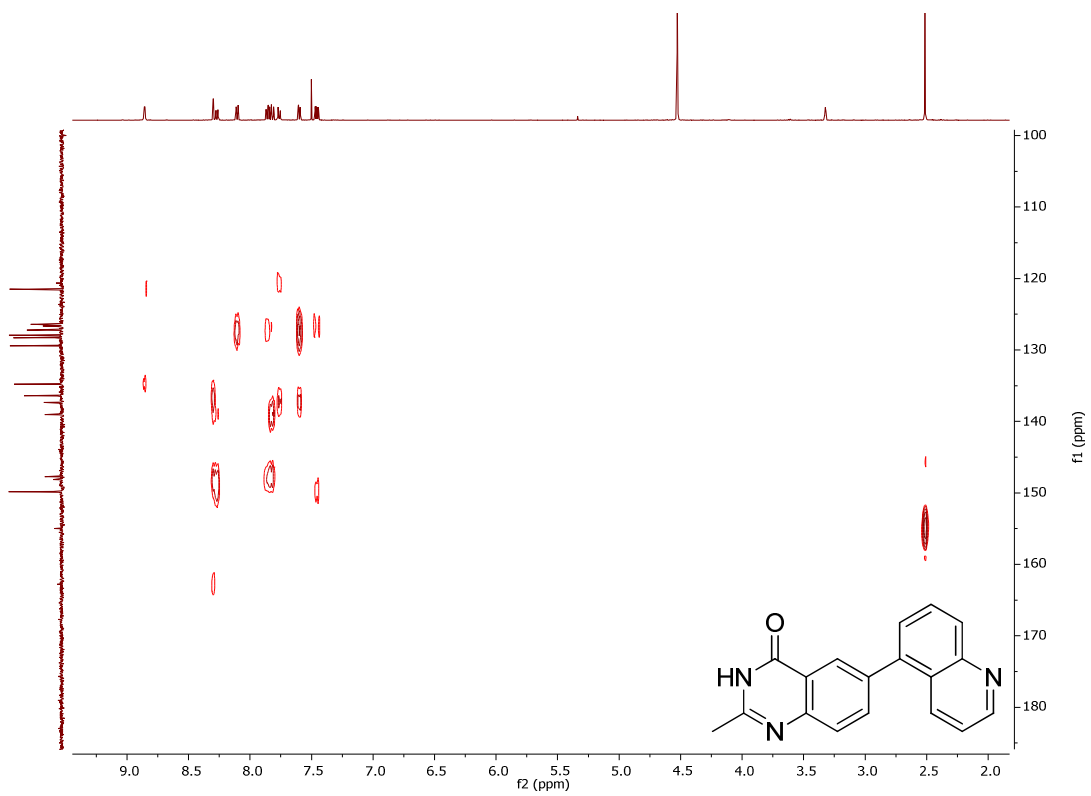



### 3-(4-Morpholinophenyl)-6-(quinolin-4-yl)quinazolin-4(3H)-one, 16

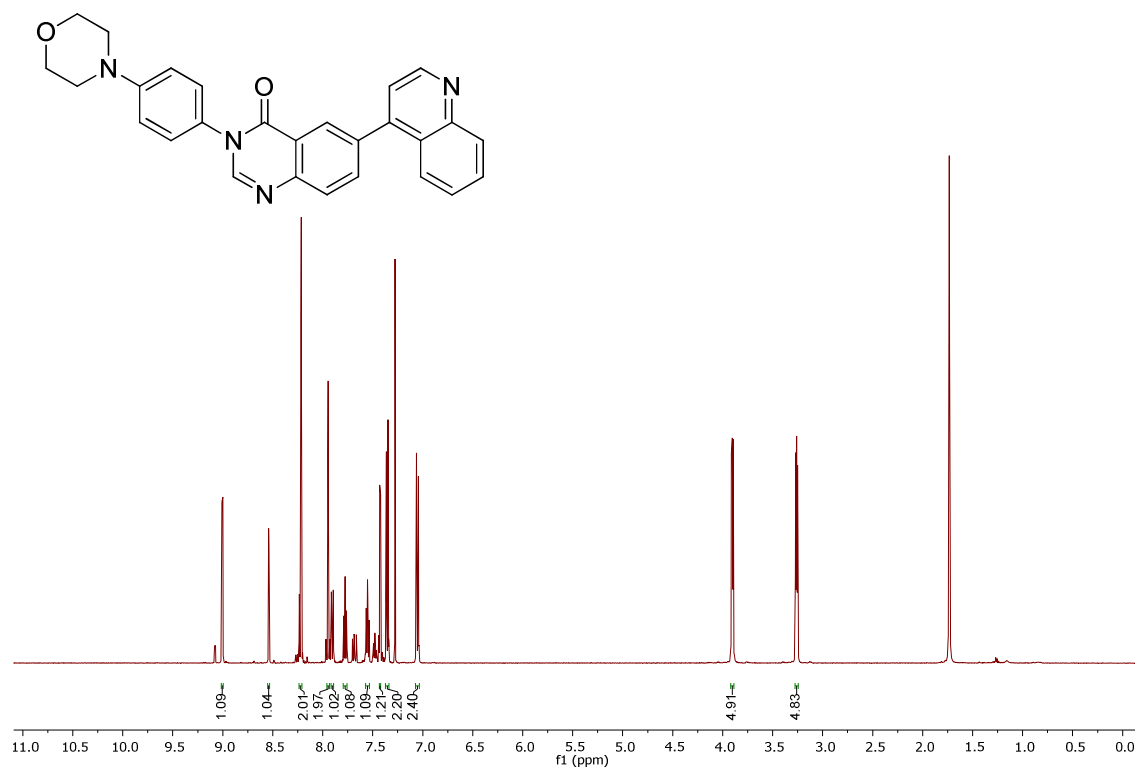

160.95  
151.67  
149.96  
148.70  
147.91  
147.22  
146.86  
137.35  
136.15  
135.63  
130.04  
129.59  
128.03  
127.95  
127.67  
127.10  
125.37  
122.62  
121.57  
115.91  
115.87

66.73

48.74

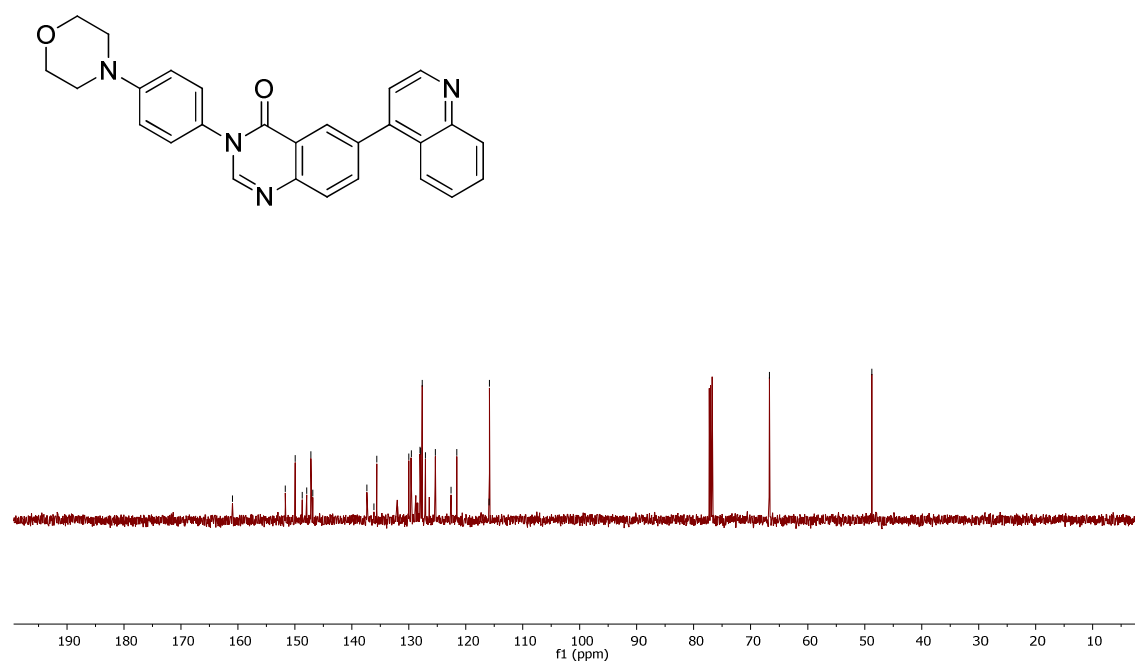

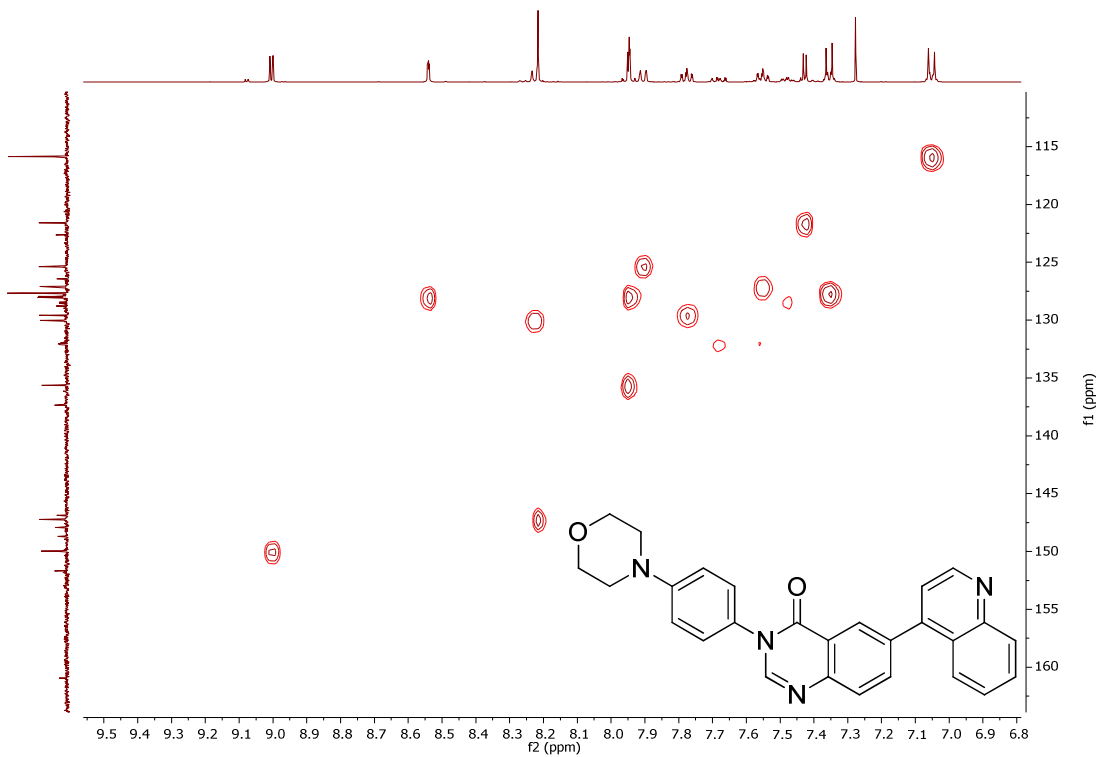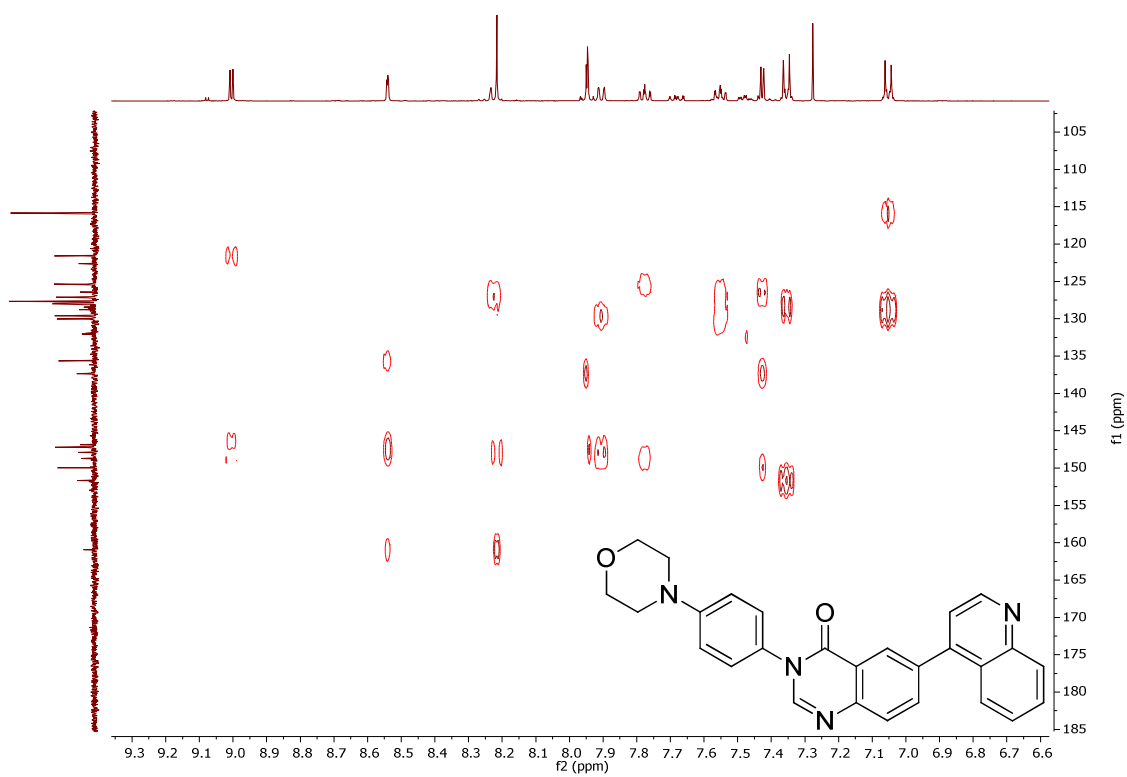

### 3-Phenyl-6-(quinolin-4-yl)quinazolin-4(3H)-one, 17

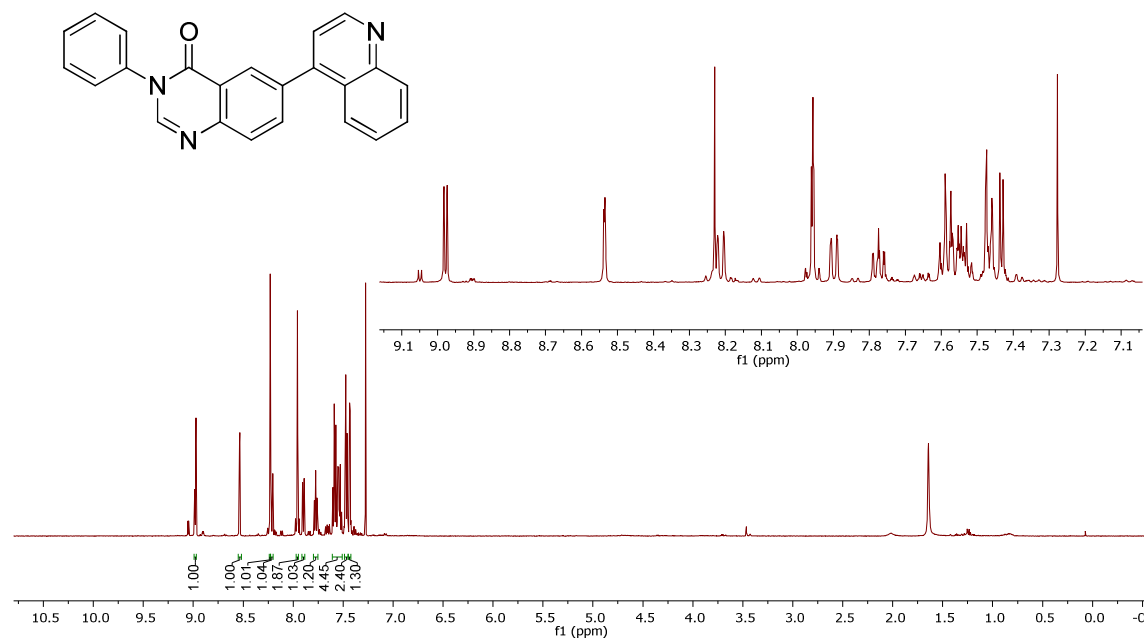

160.63  
149.82  
149.73  
148.50  
147.80  
146.83  
137.47  
135.81  
129.77  
129.74  
129.37  
128.04  
127.97  
127.21  
126.96  
126.42  
125.34  
122.57  
121.59

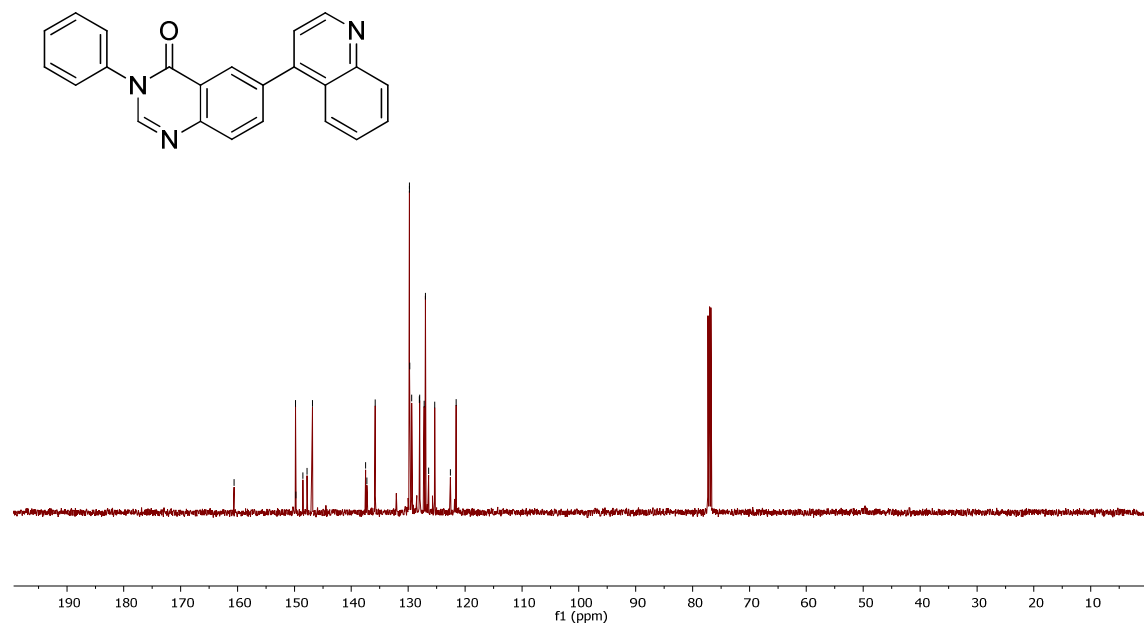

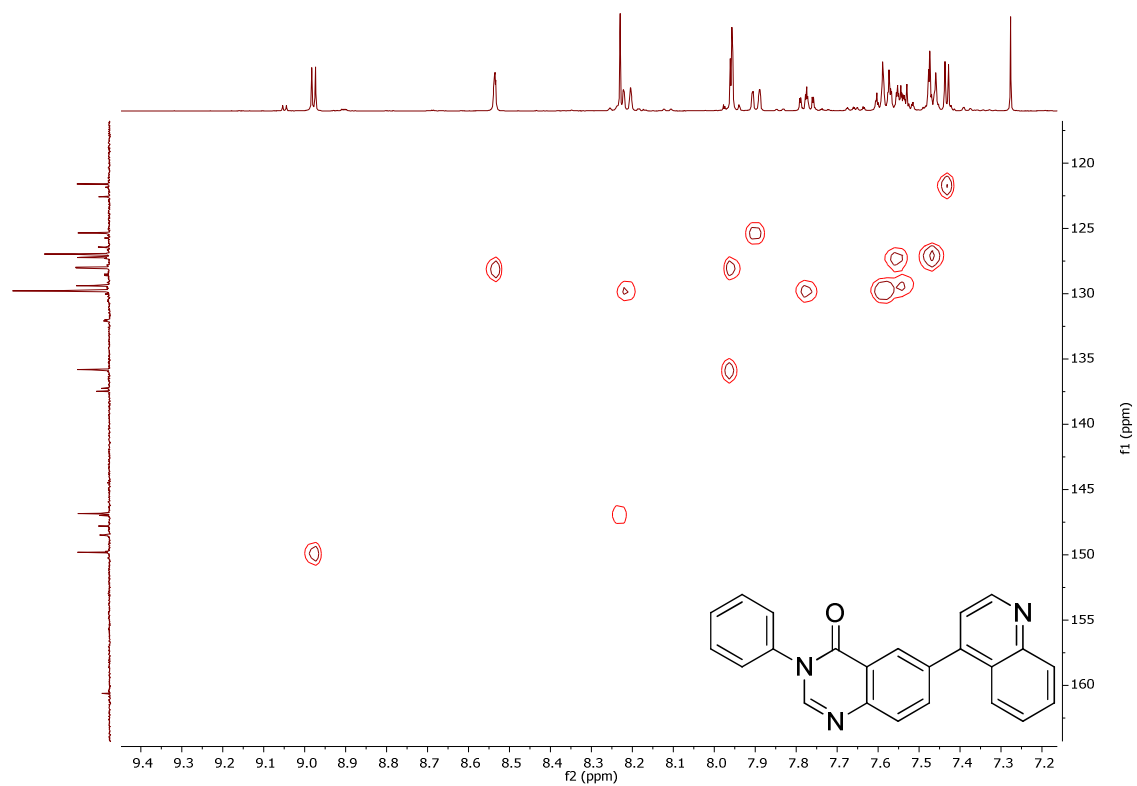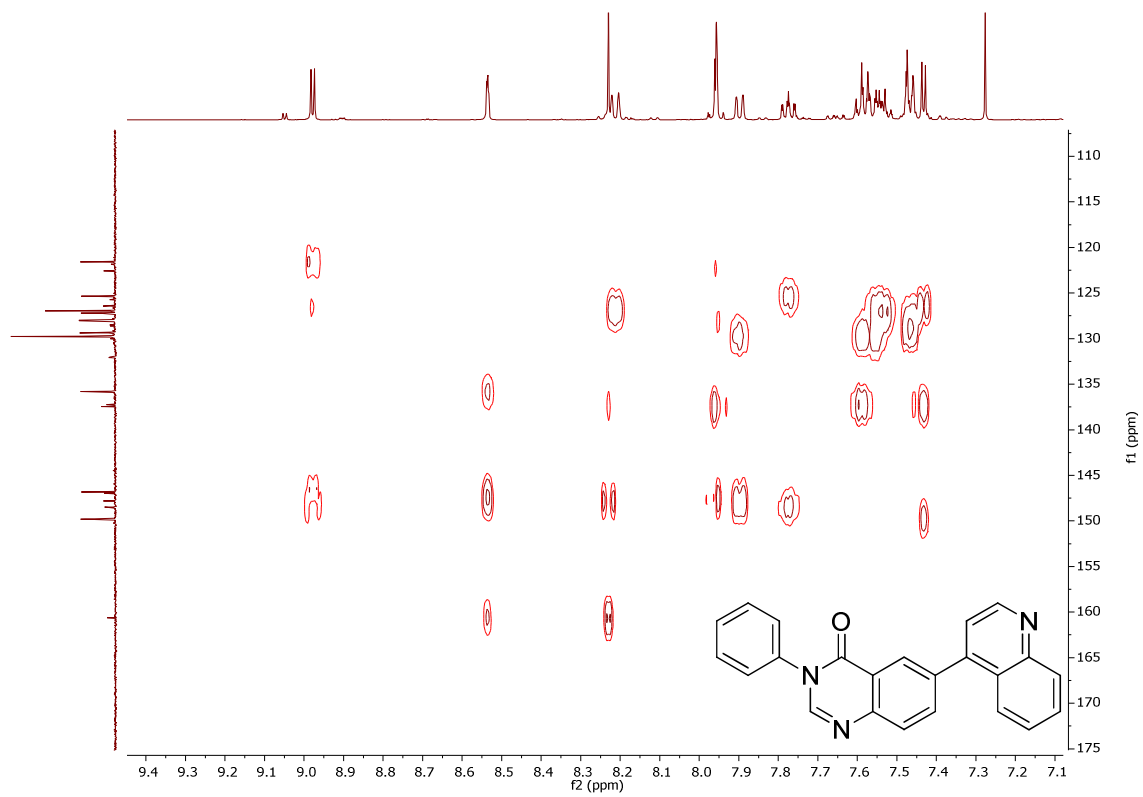

### 3-Cyclohexyl-6-(quinolin-4-yl)quinazolin-4(3H)-one, 18

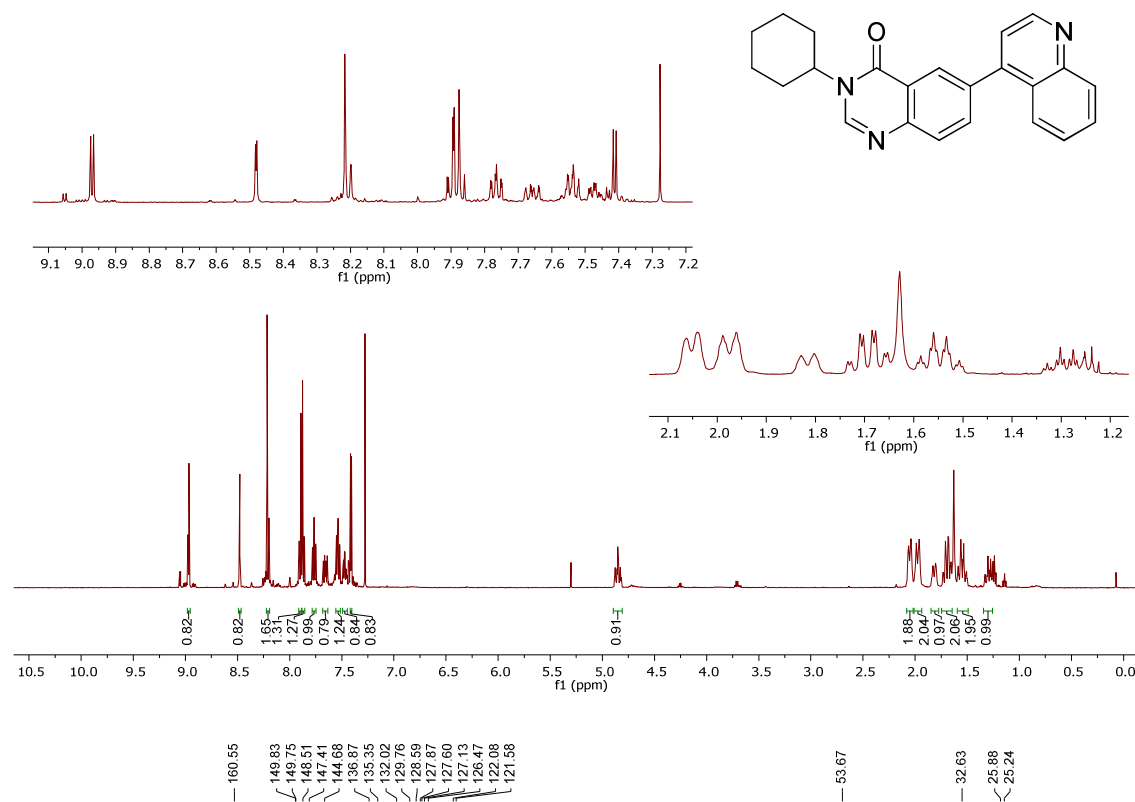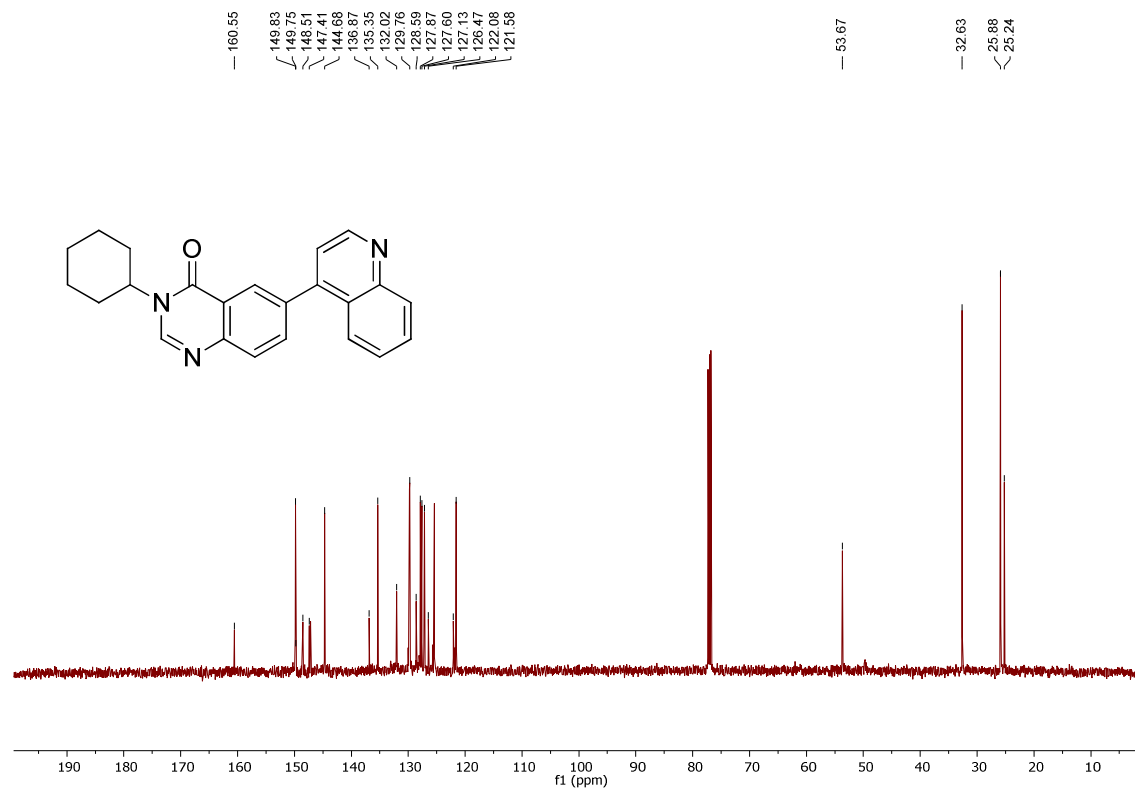

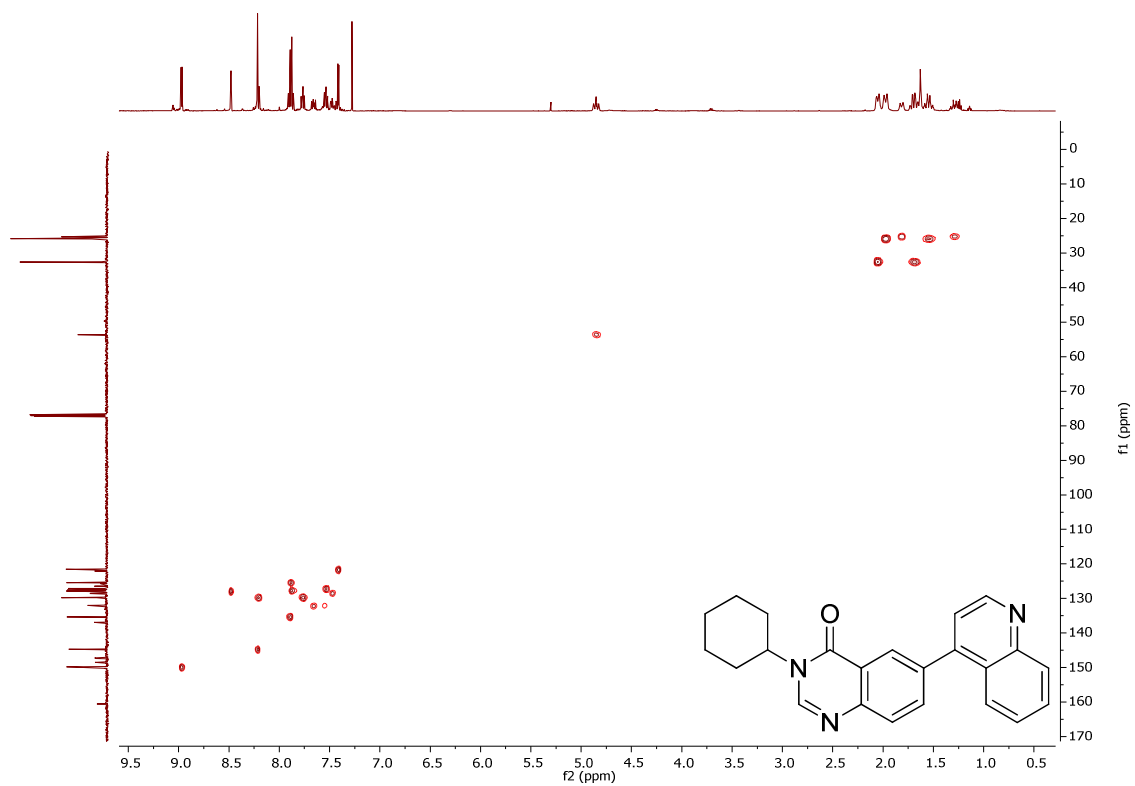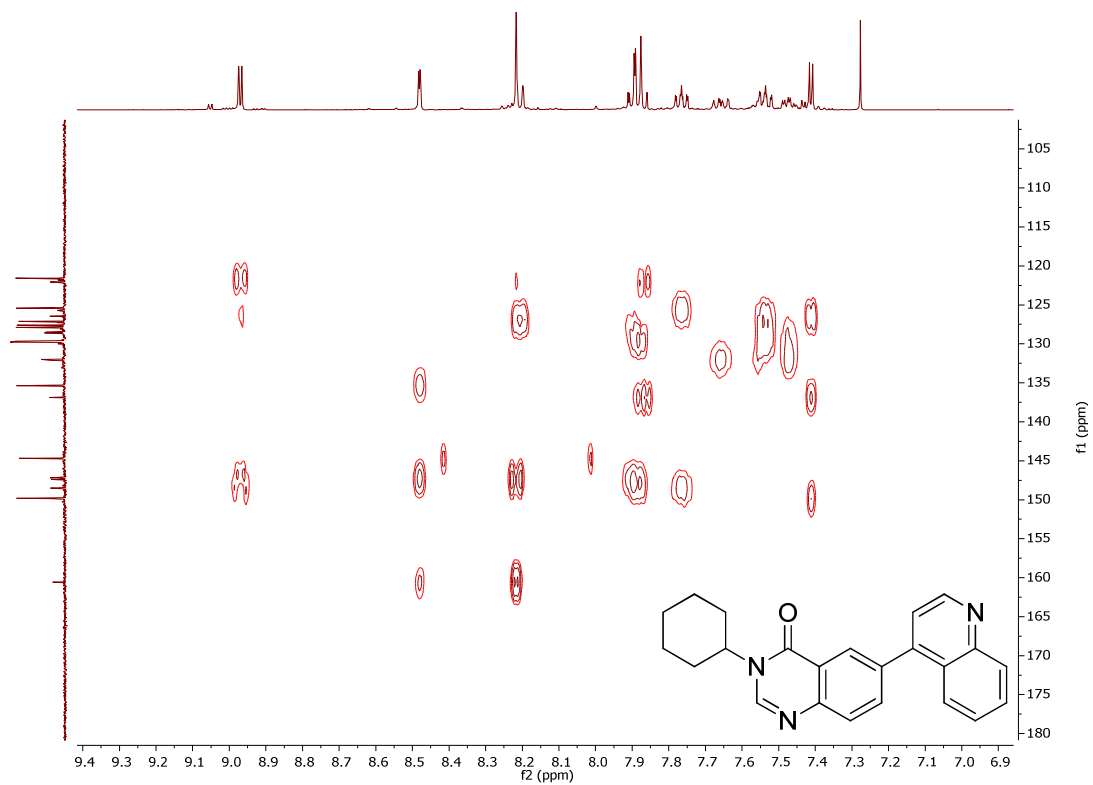

3-(3-Morpholinopropyl)-6-(quinolin-4-yl)quinazolin-4(3H)-one, 19

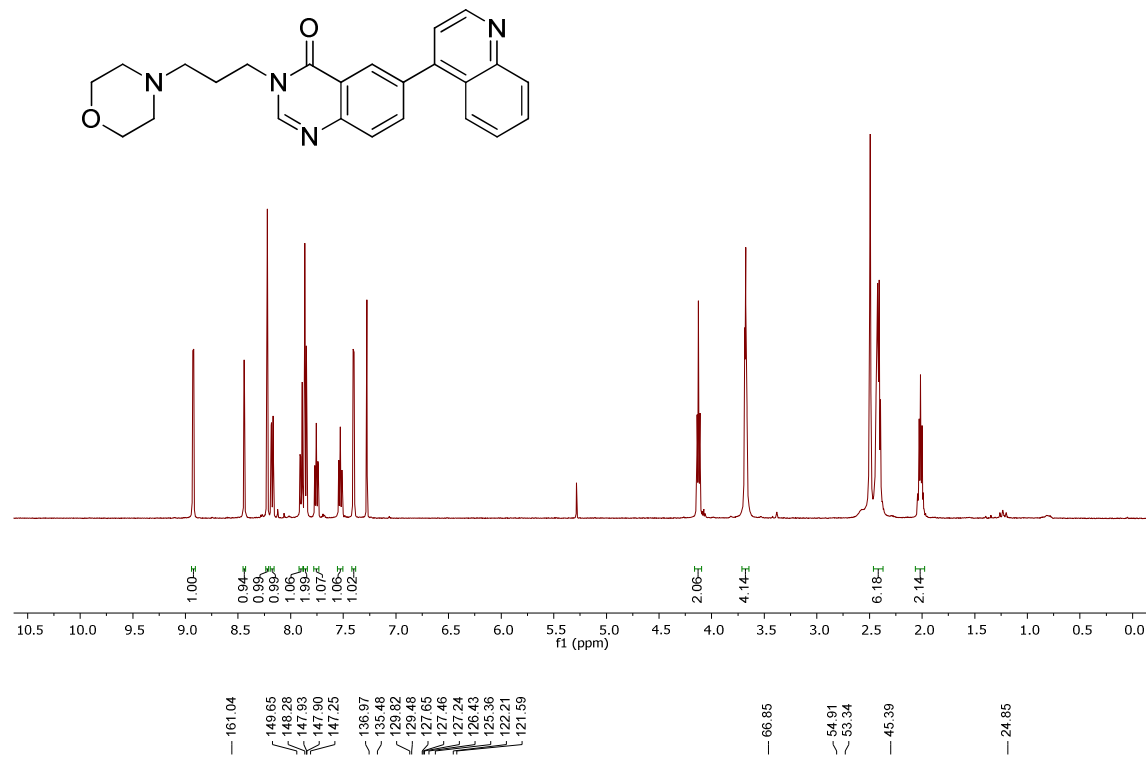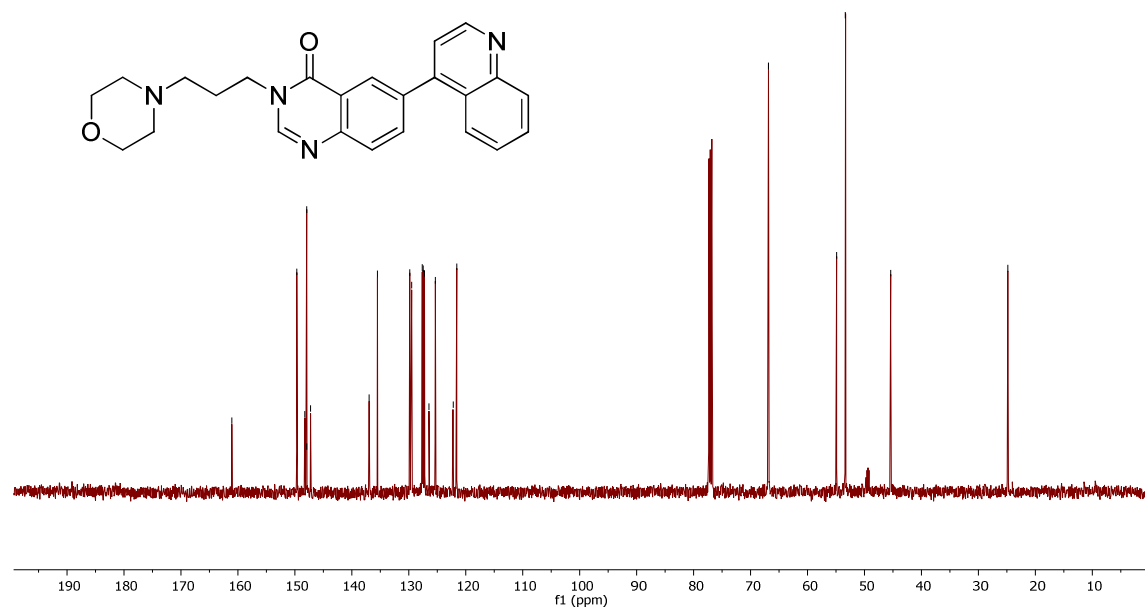

3-(4-(Dimethylamino)phenyl)-6-(quinolin-4-yl)quinazolin-4(3H)-one, 20

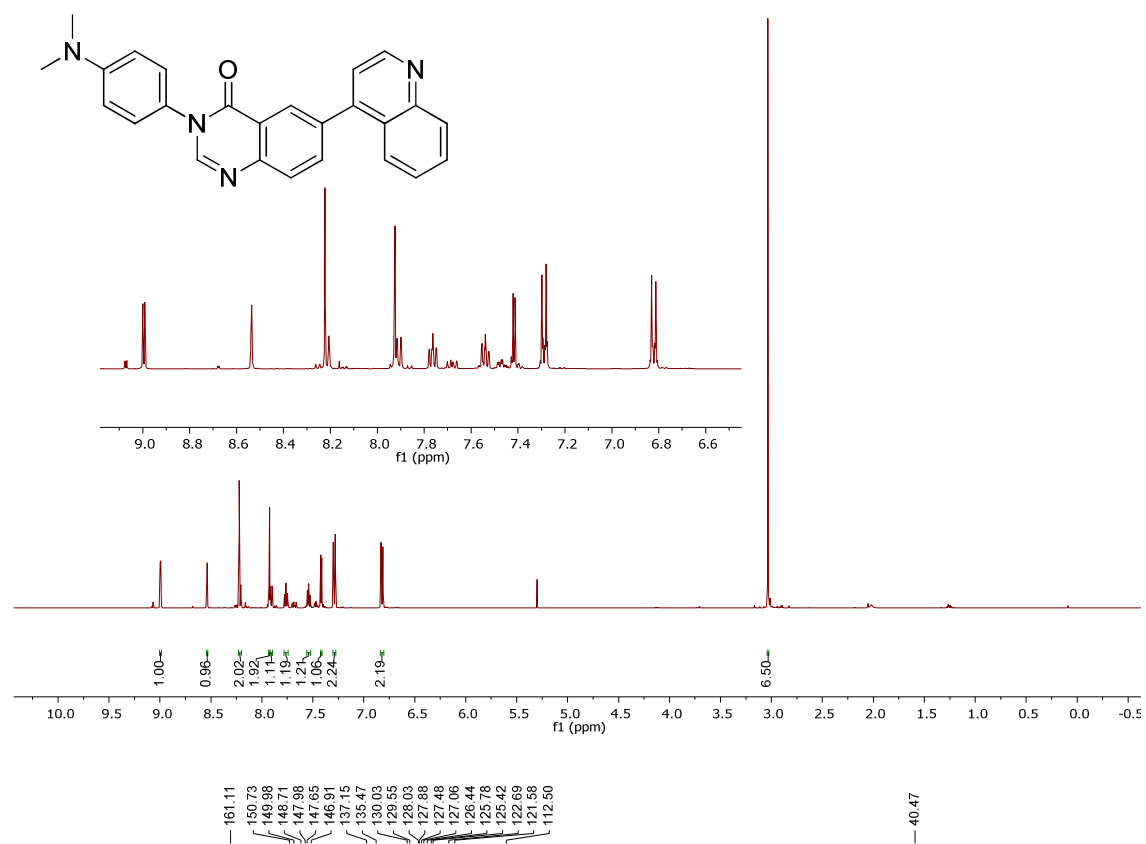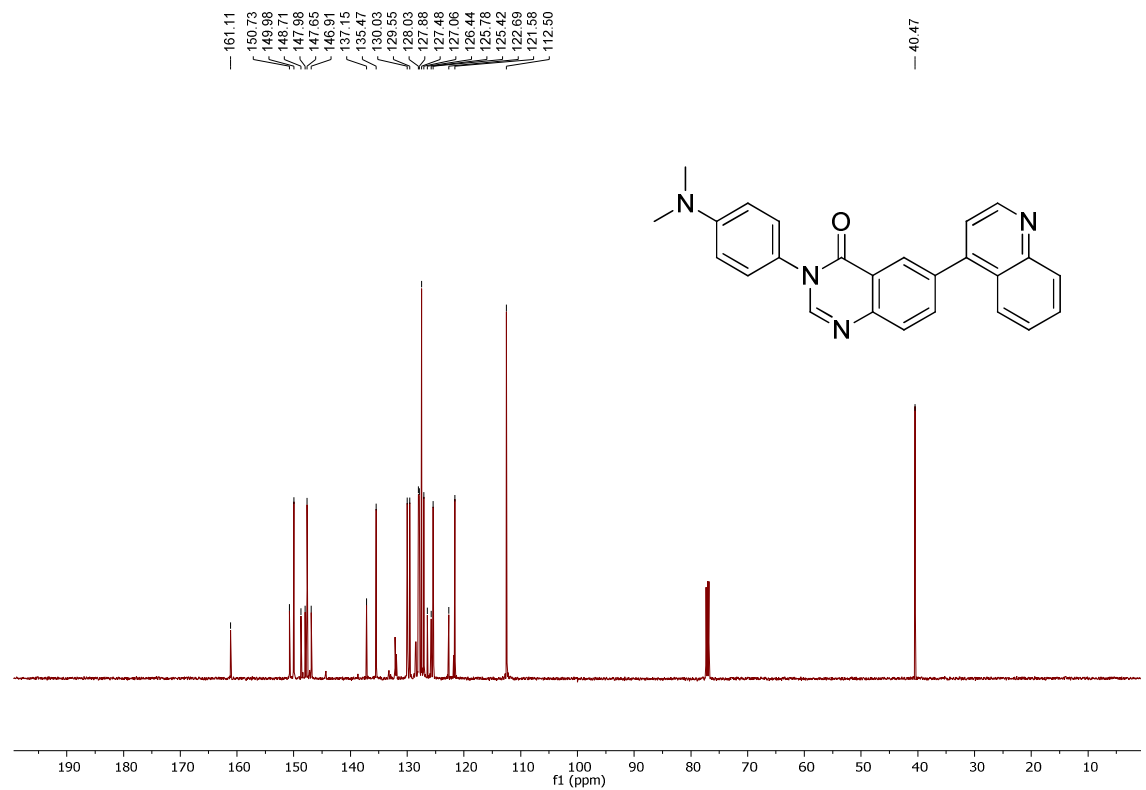



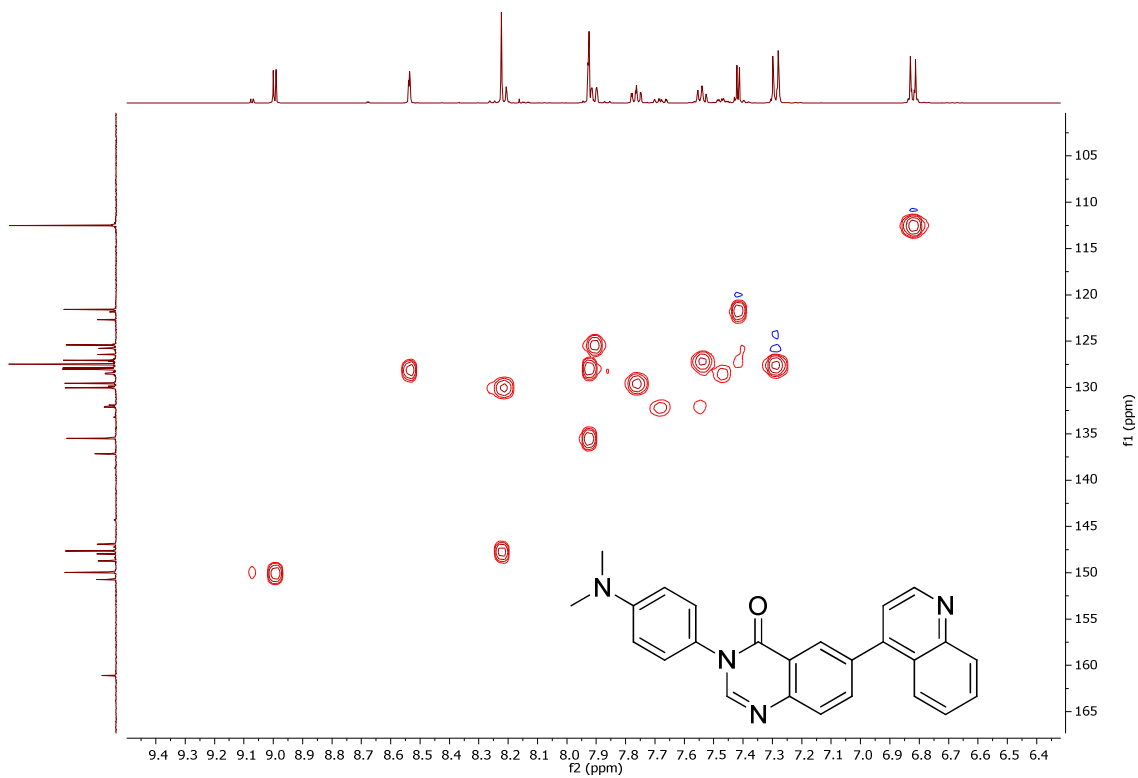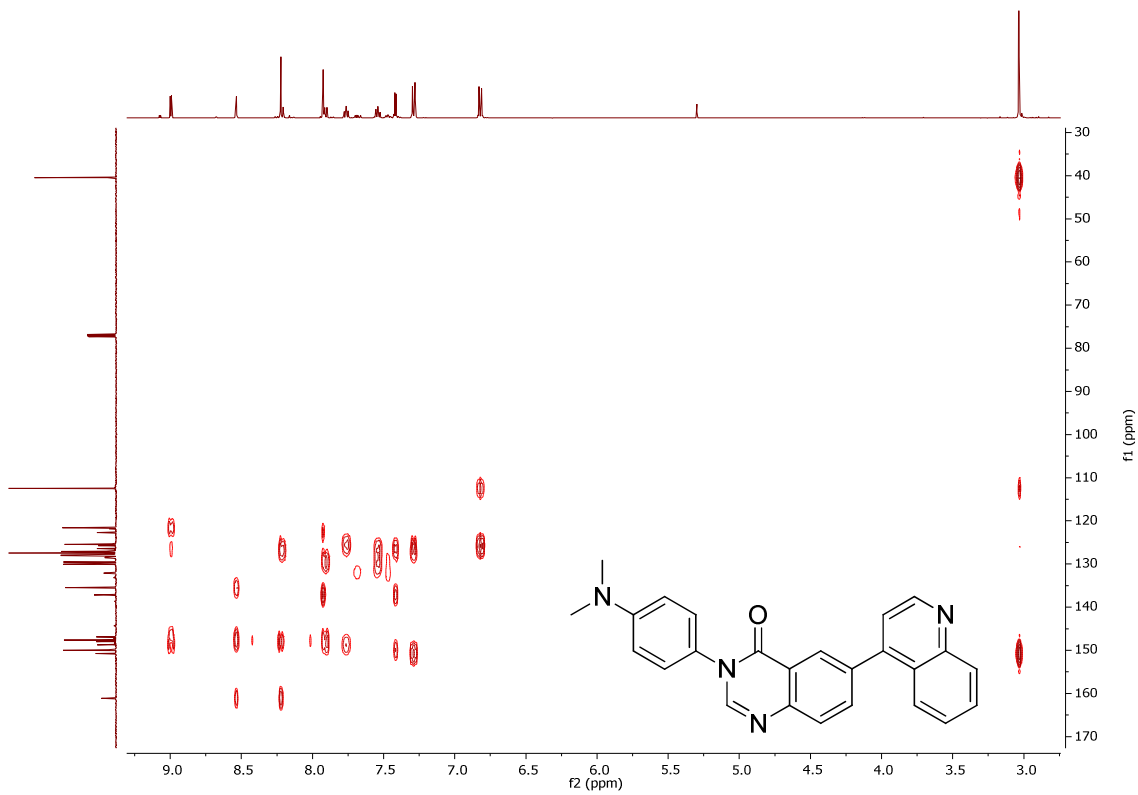

2,5-Dimethyl-6-(quinolin-4-yl)quinazolin-4(3H)-one, 21

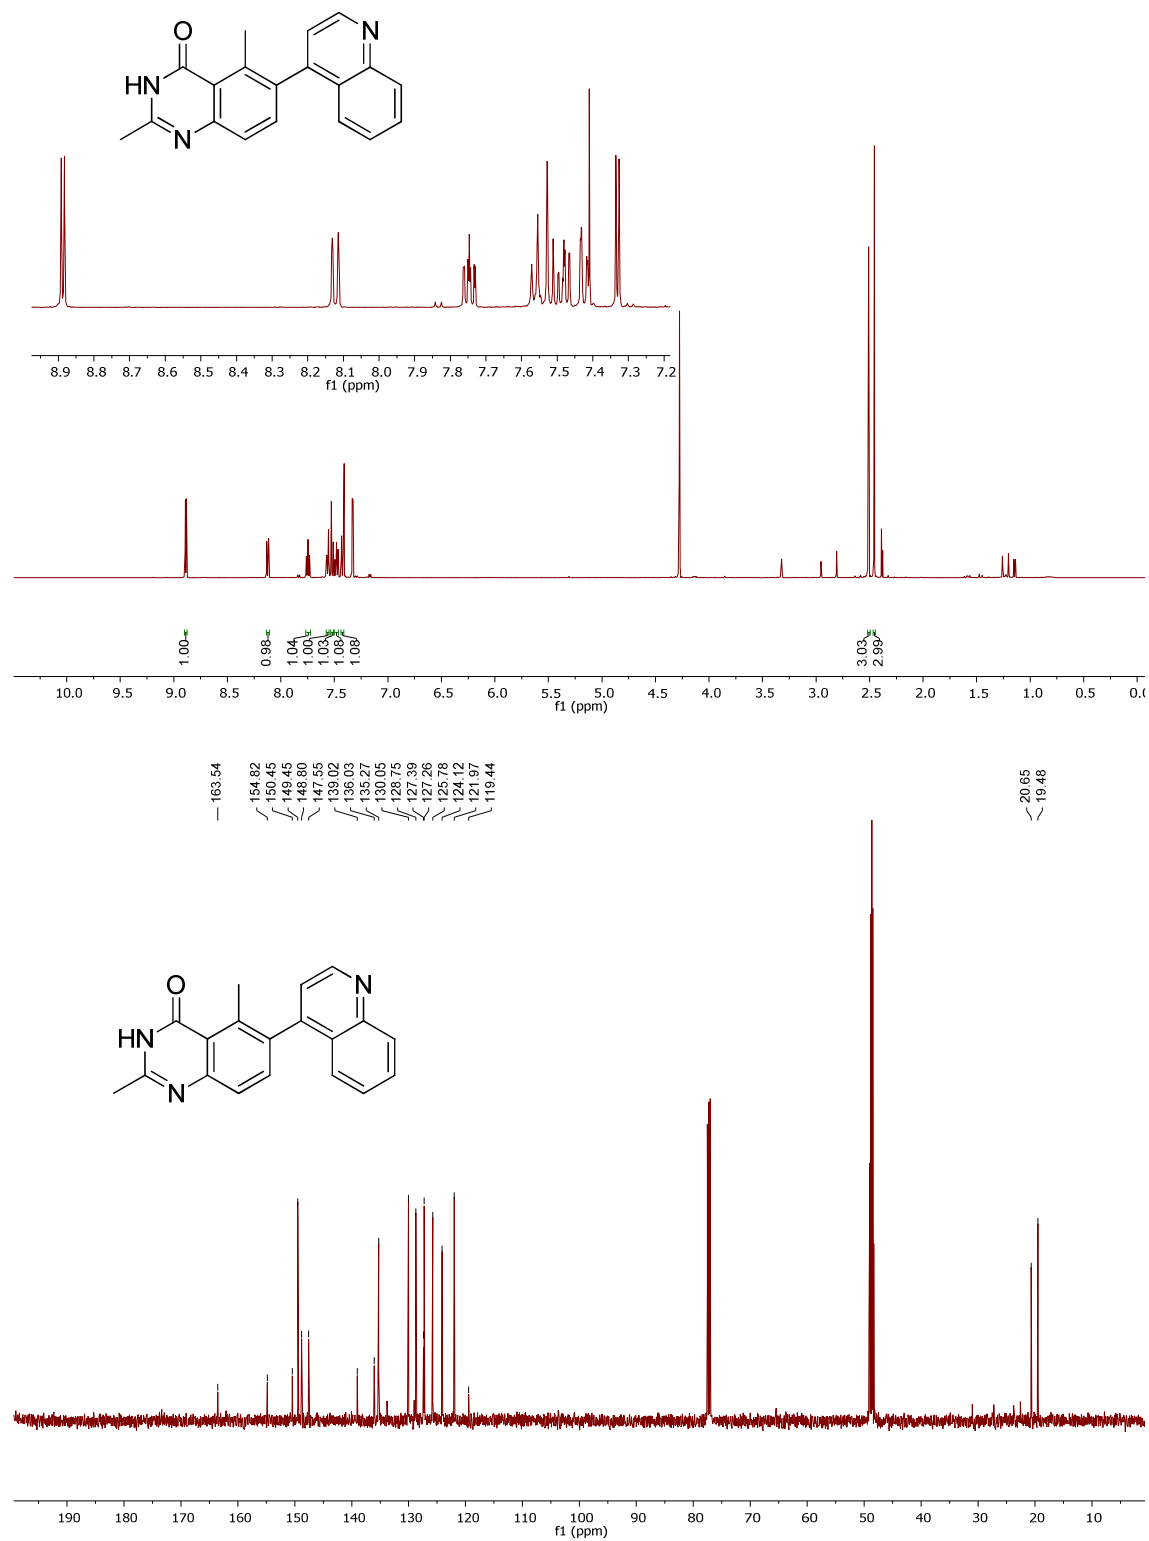

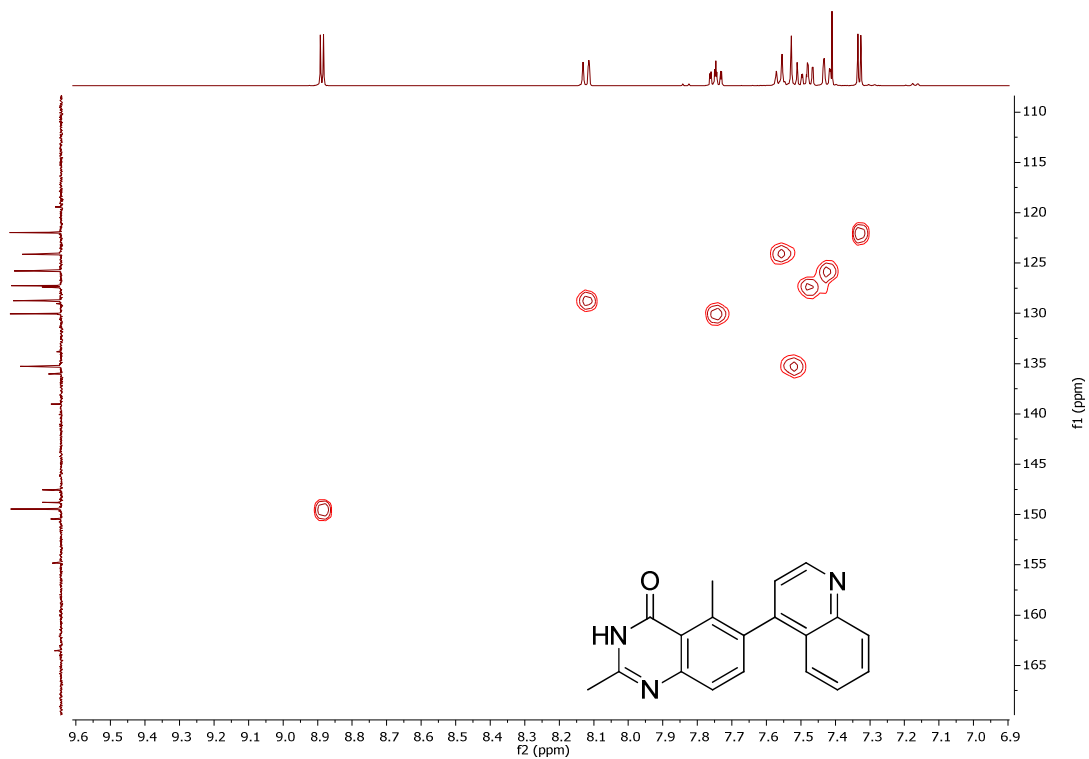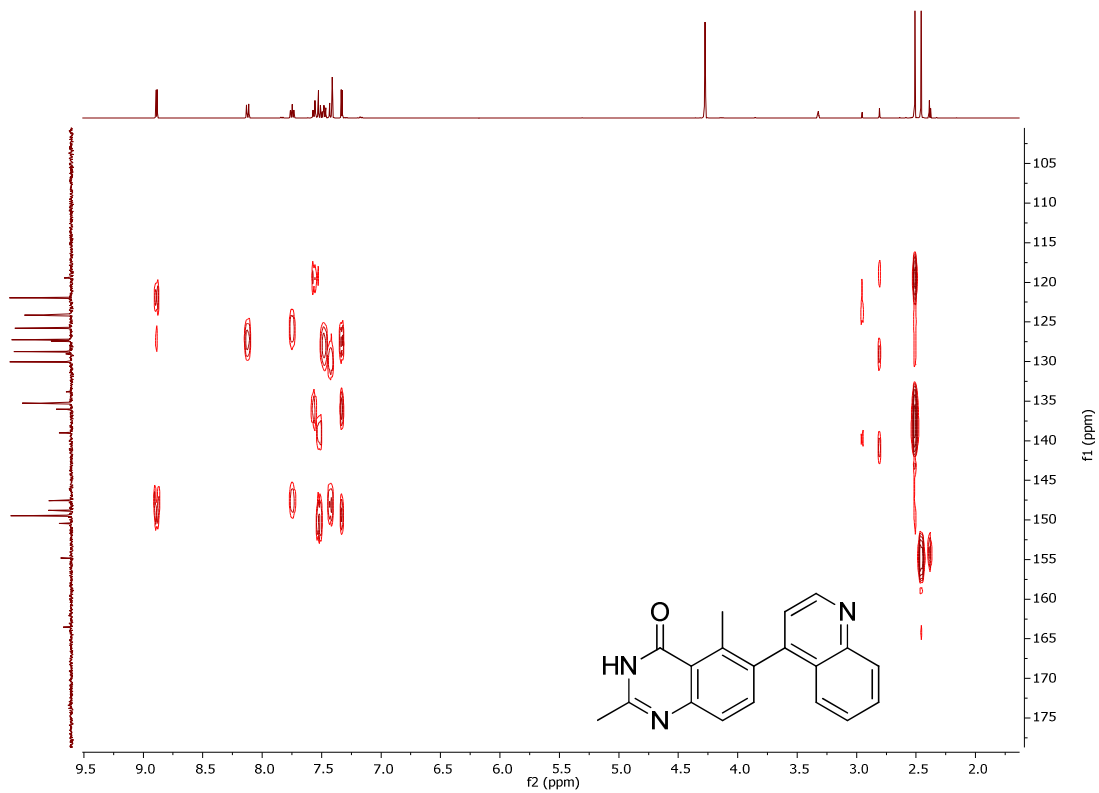

# 2-Ethyl-5-methyl-6-(quinolin-4-yl)quinazolin-4(3H)-one, 22

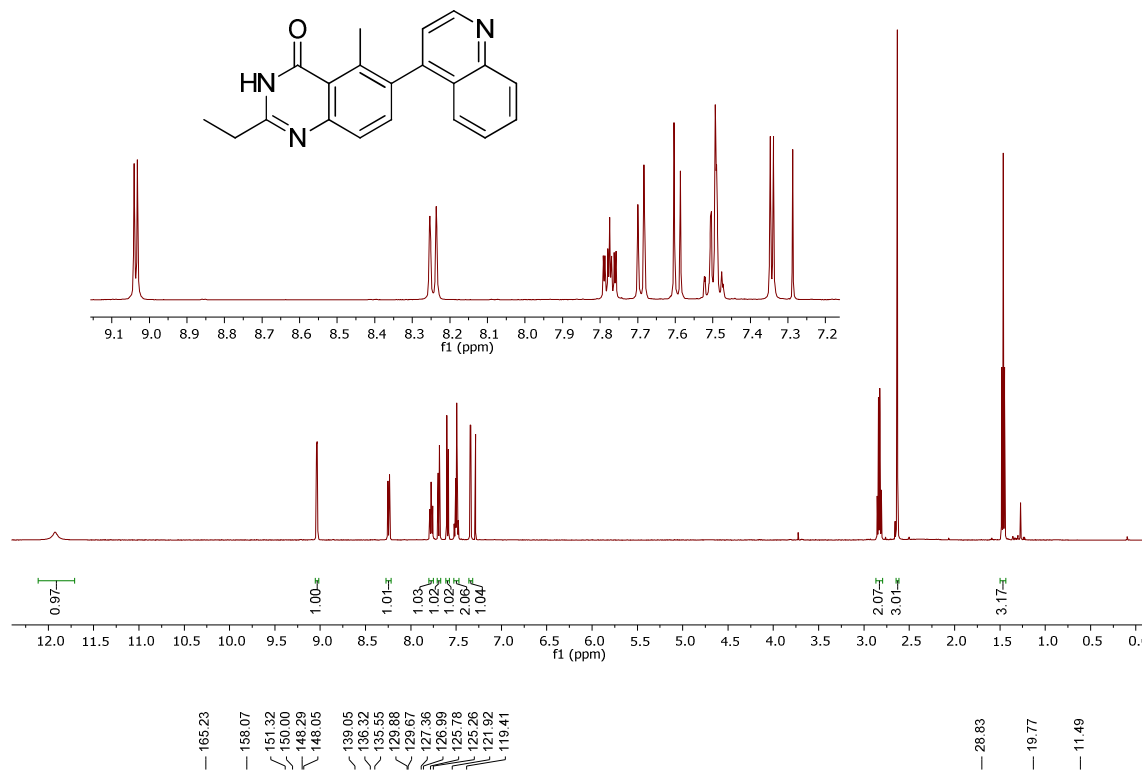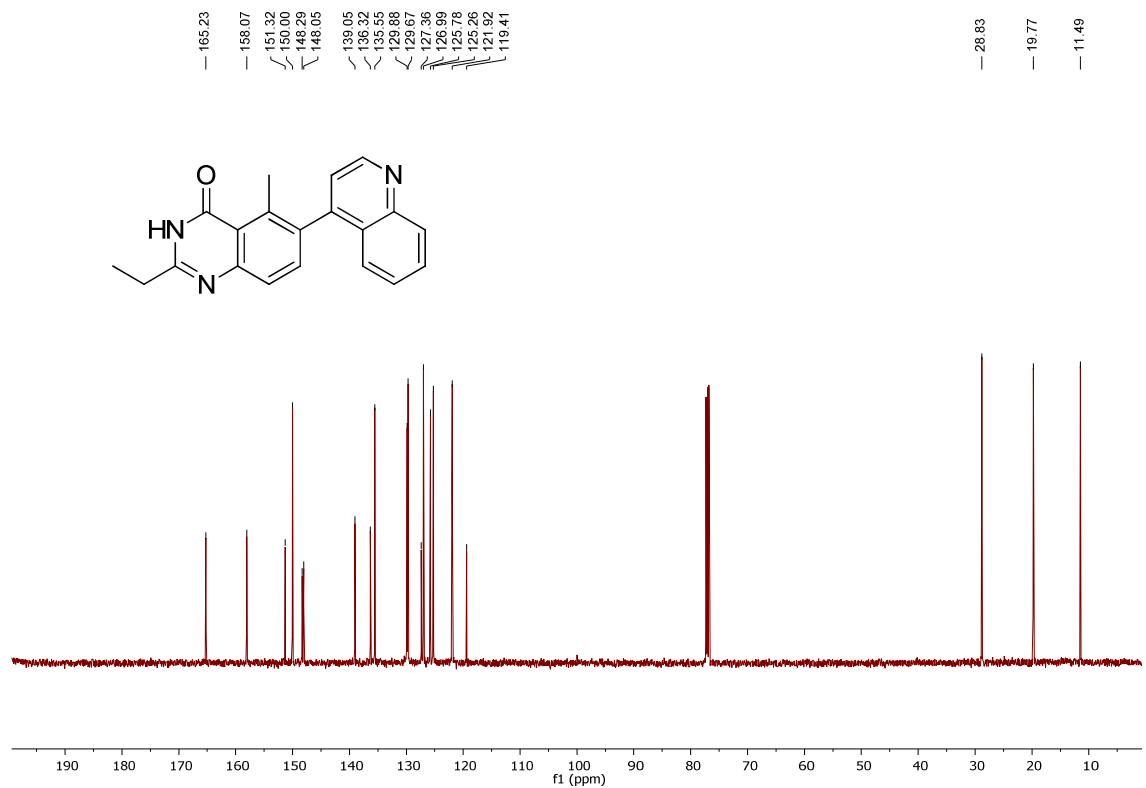

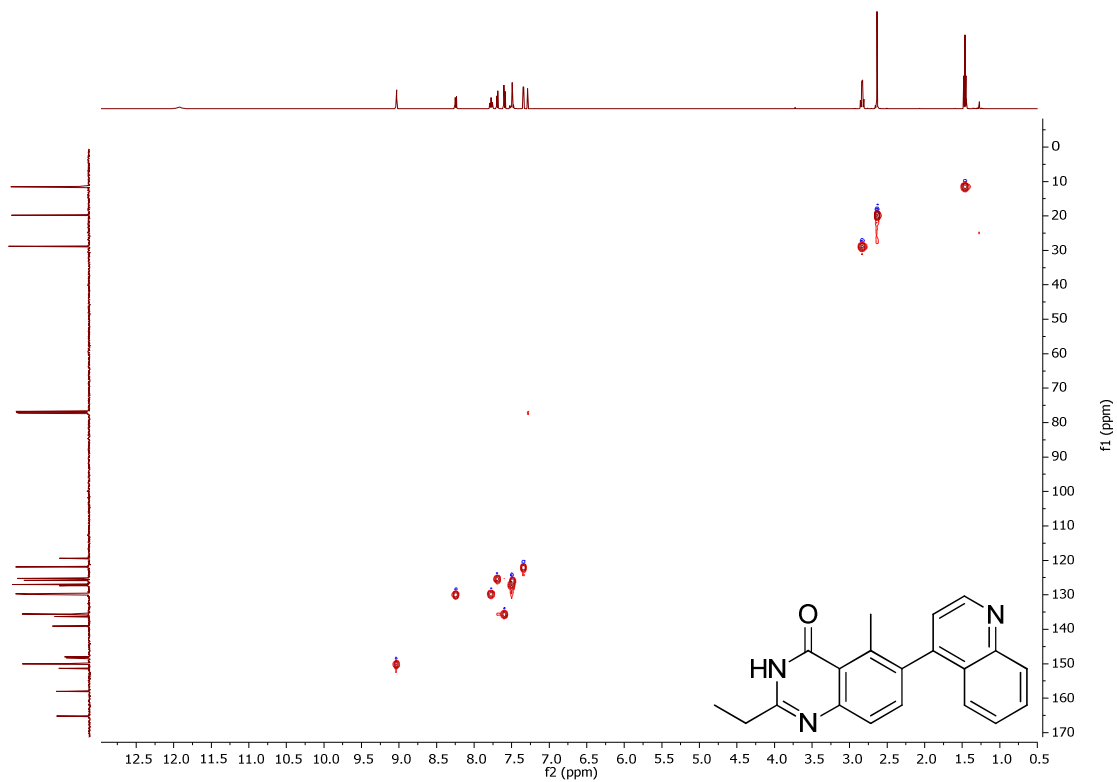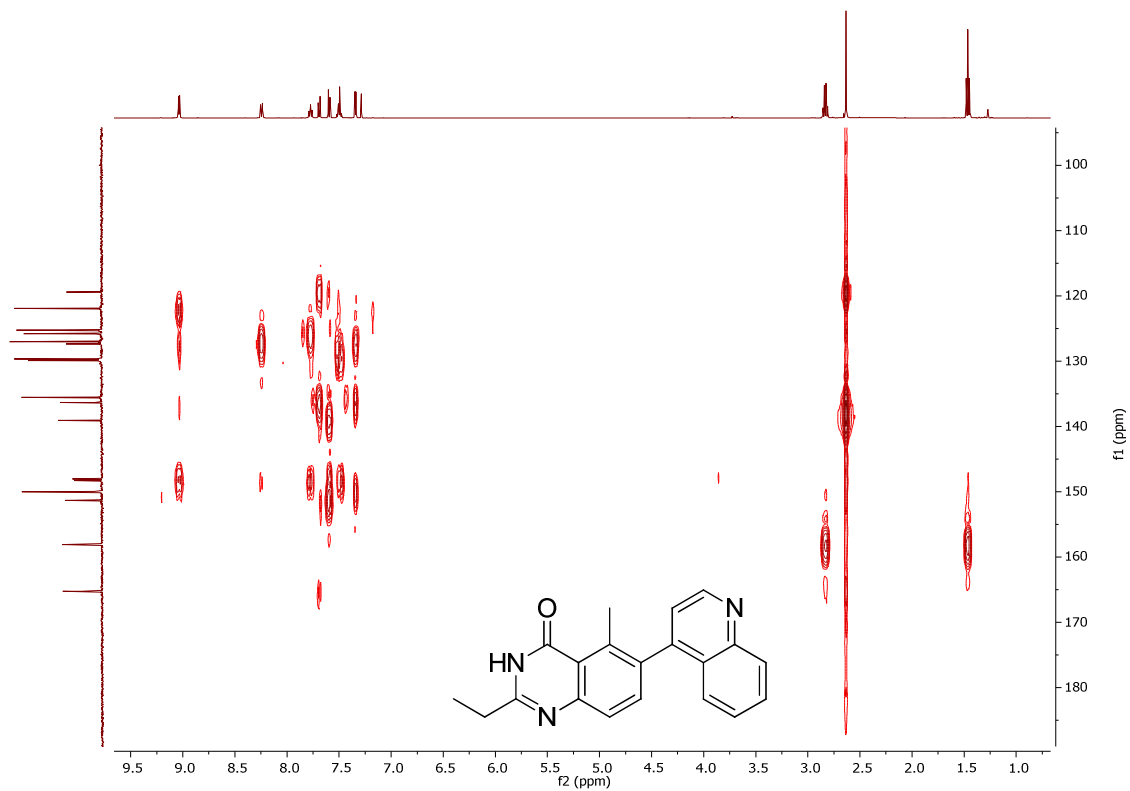

2-Benzyl-5-methyl-6-(quinolin-4-yl)quinazolin-4(3H)-one, 23

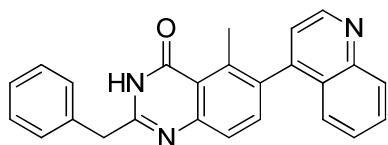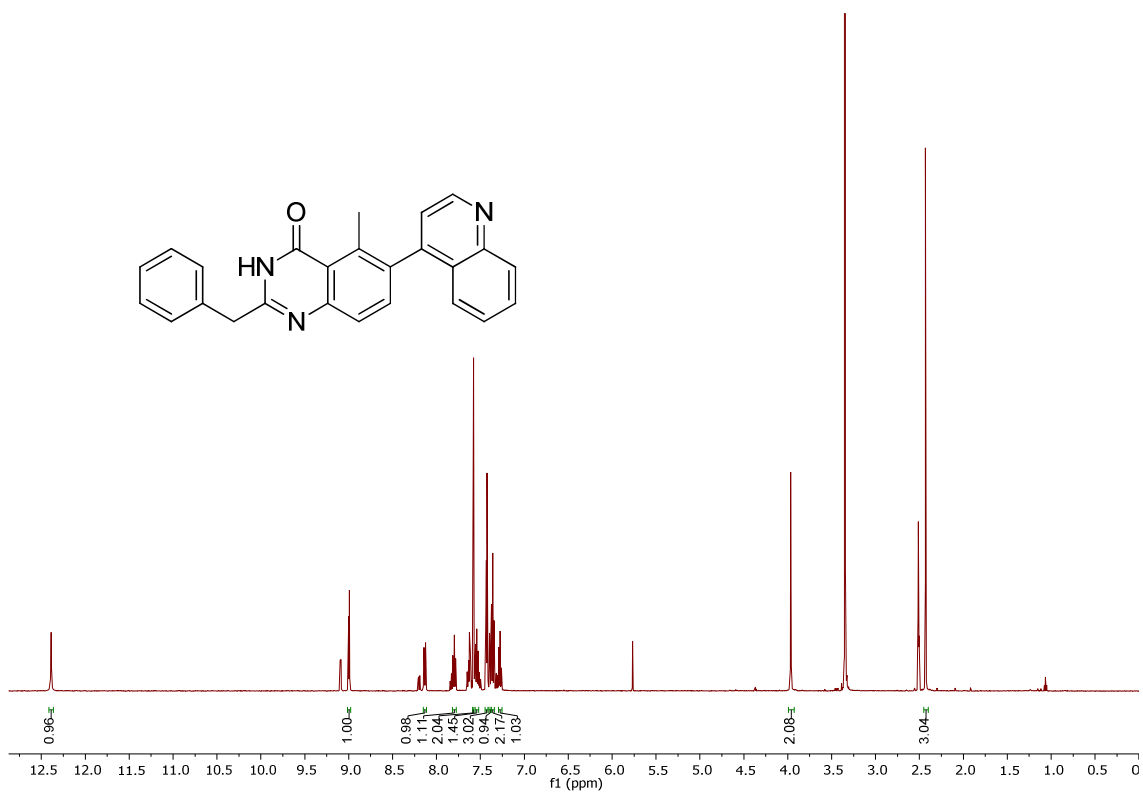

163.35  
156.81  
151.13  
150.75  
148.24  
147.58  
138.26  
137.68  
137.97  
136.32  
130.10  
130.00  
129.32  
128.99  
128.84  
127.84  
127.29  
127.10  
125.95  
125.49  
122.53  
119.88

40.31

19.80

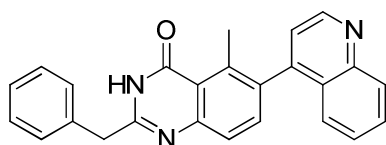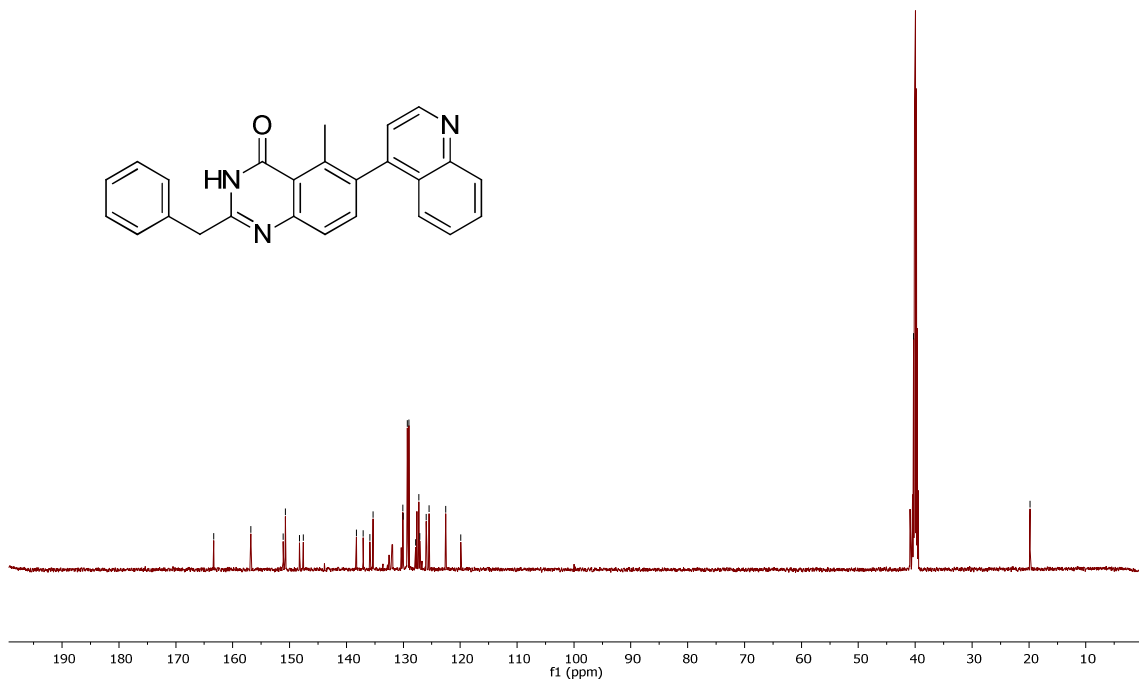

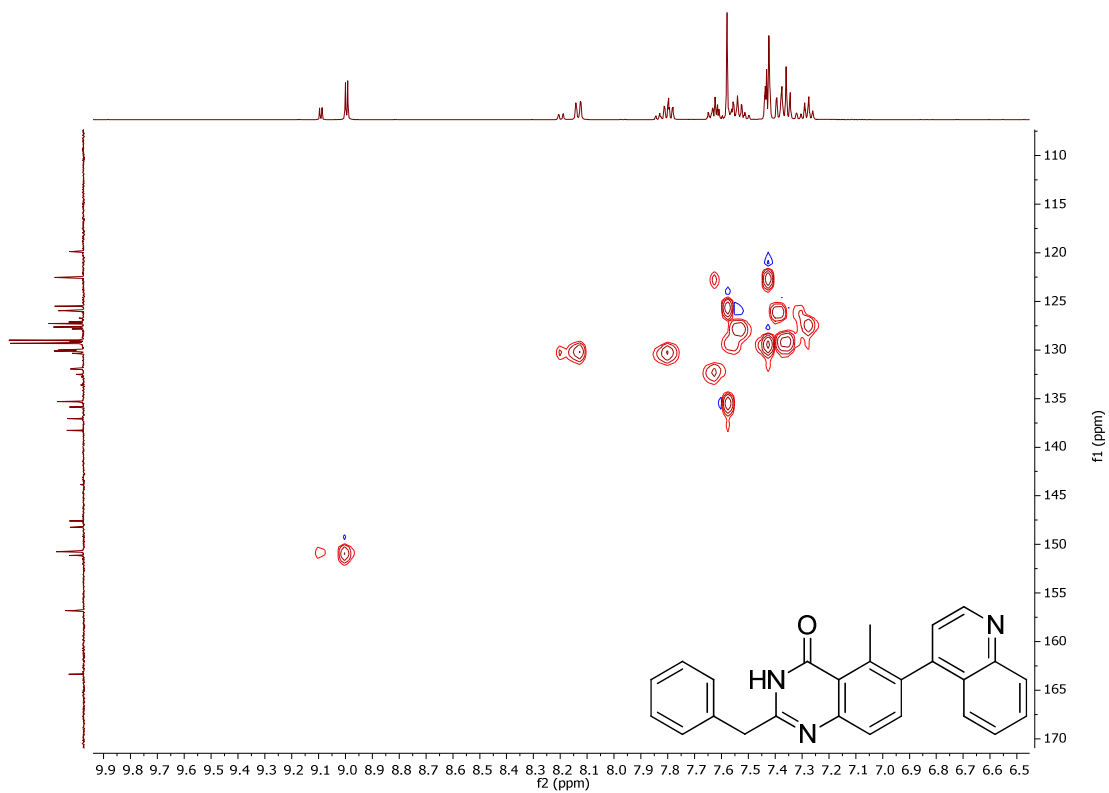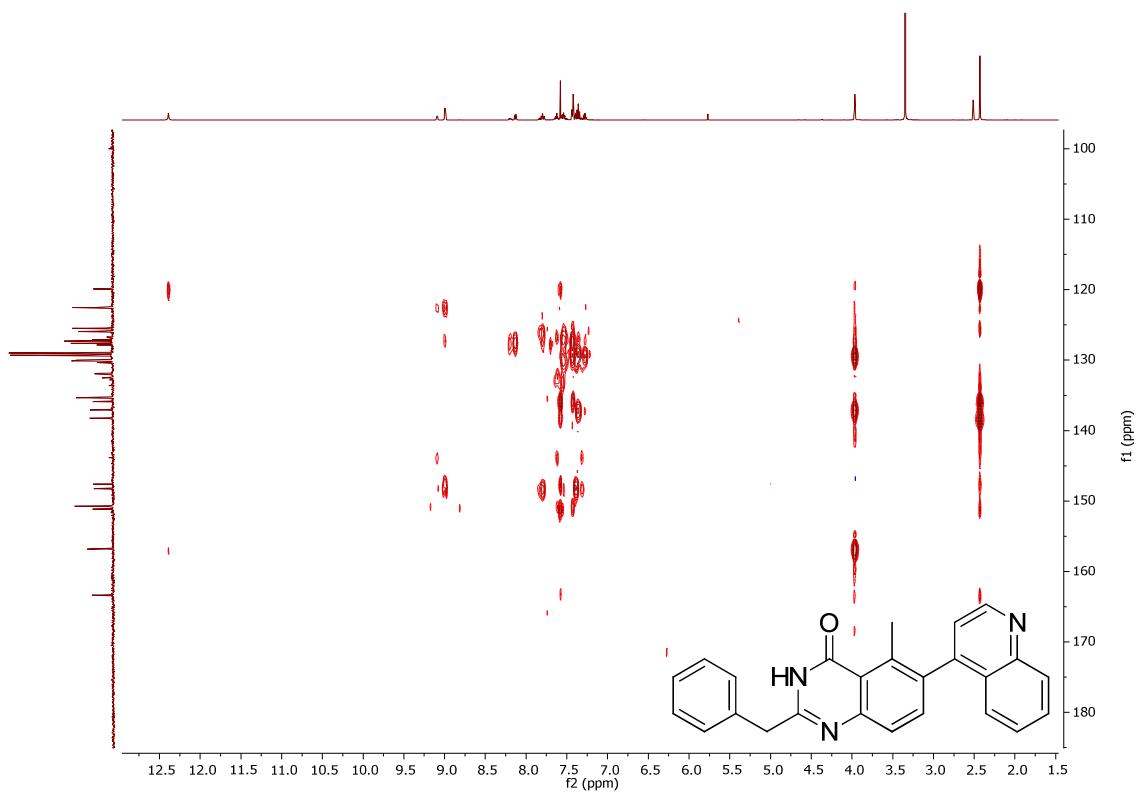

### 3,8-Dimethyl-7-(quinolin-4-yl)isoquinolin-1(2H)-one, 24

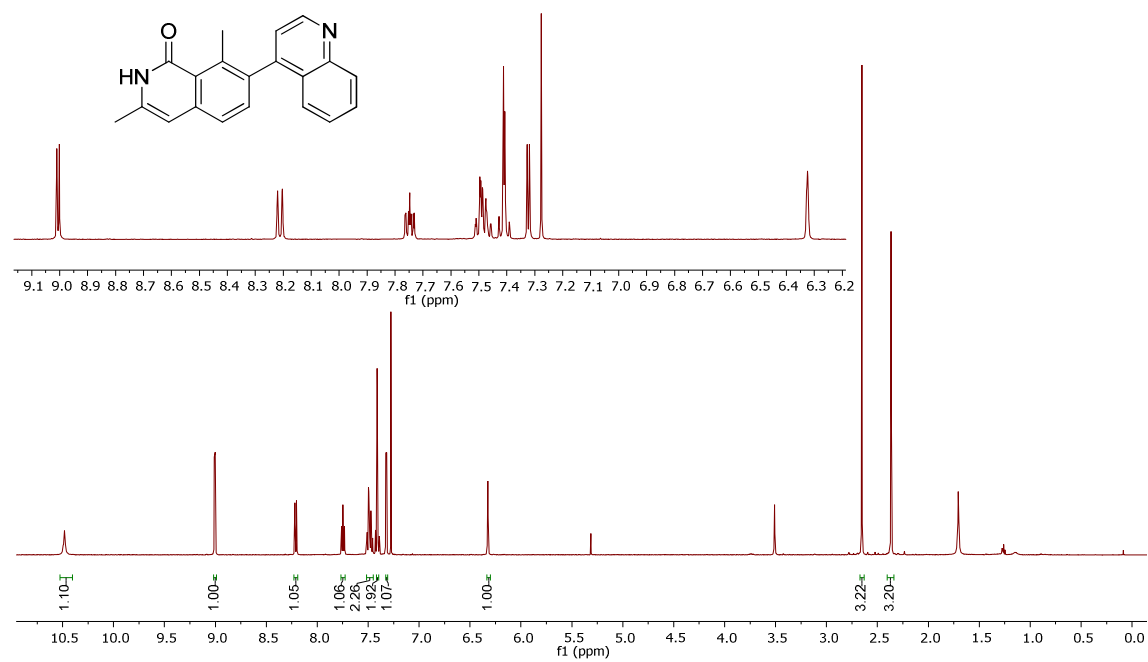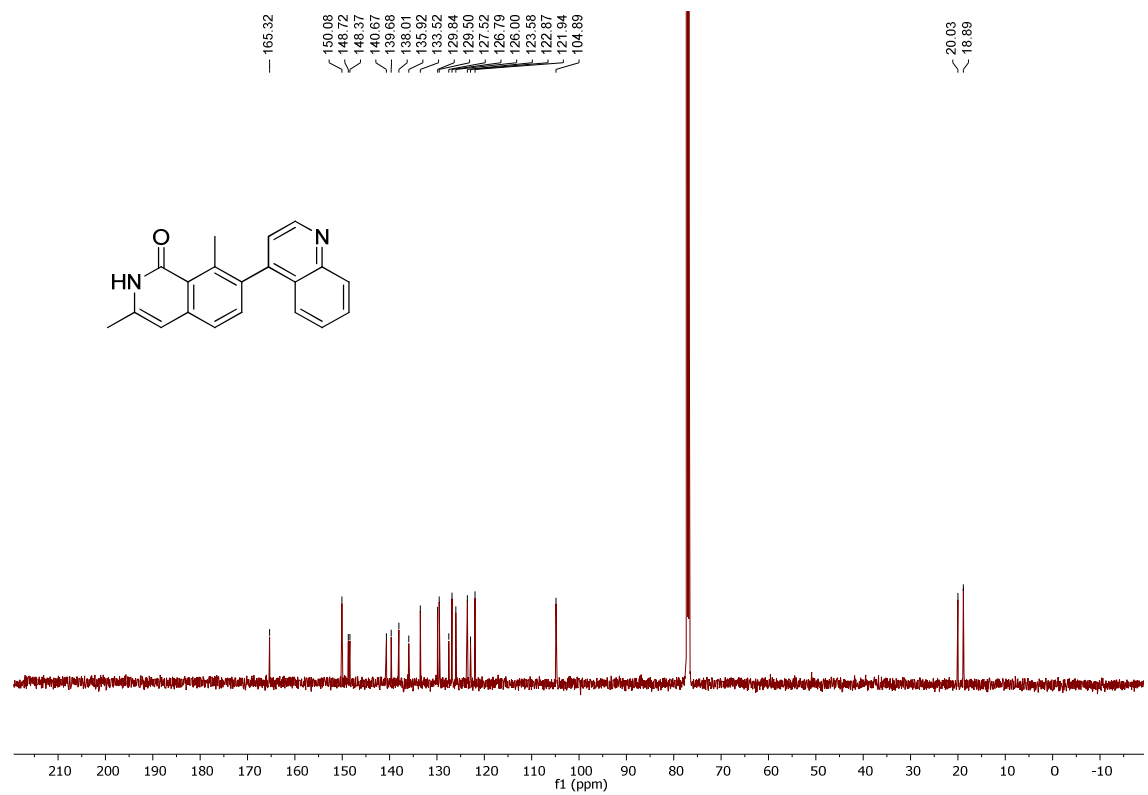



2-Benzyl-6-bromo-5-methylquinazolin-4(3H)-one, 26

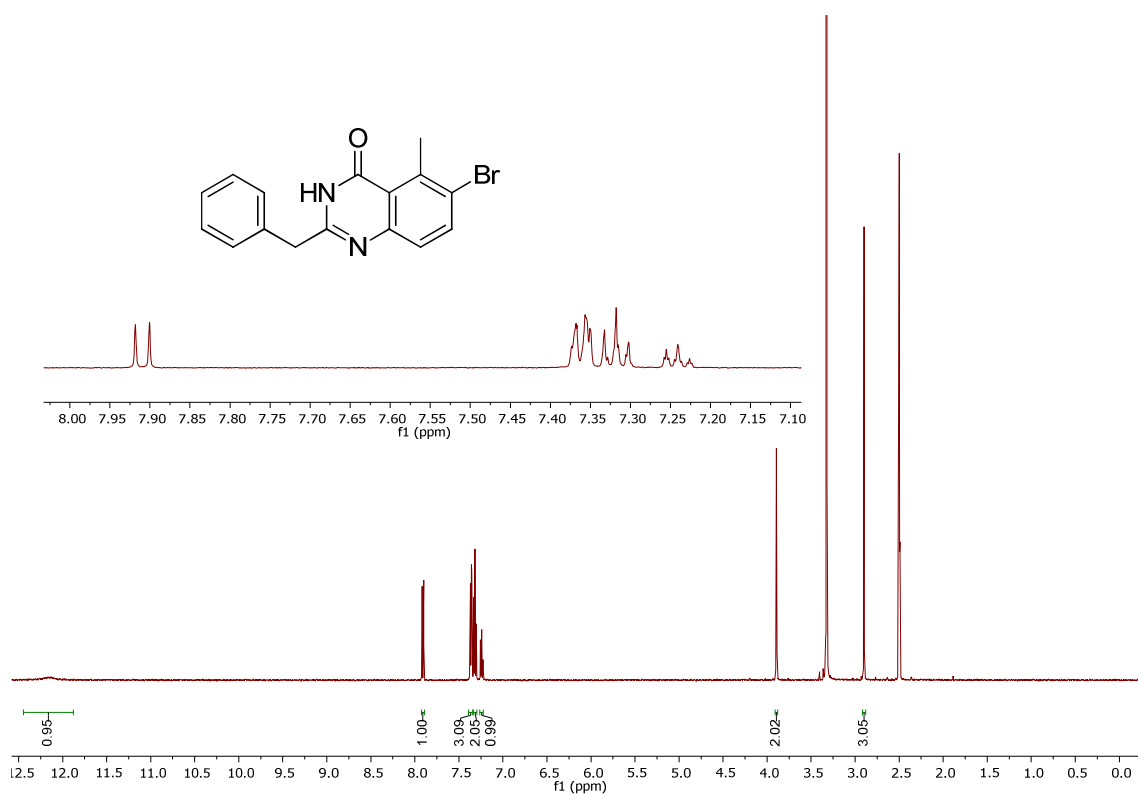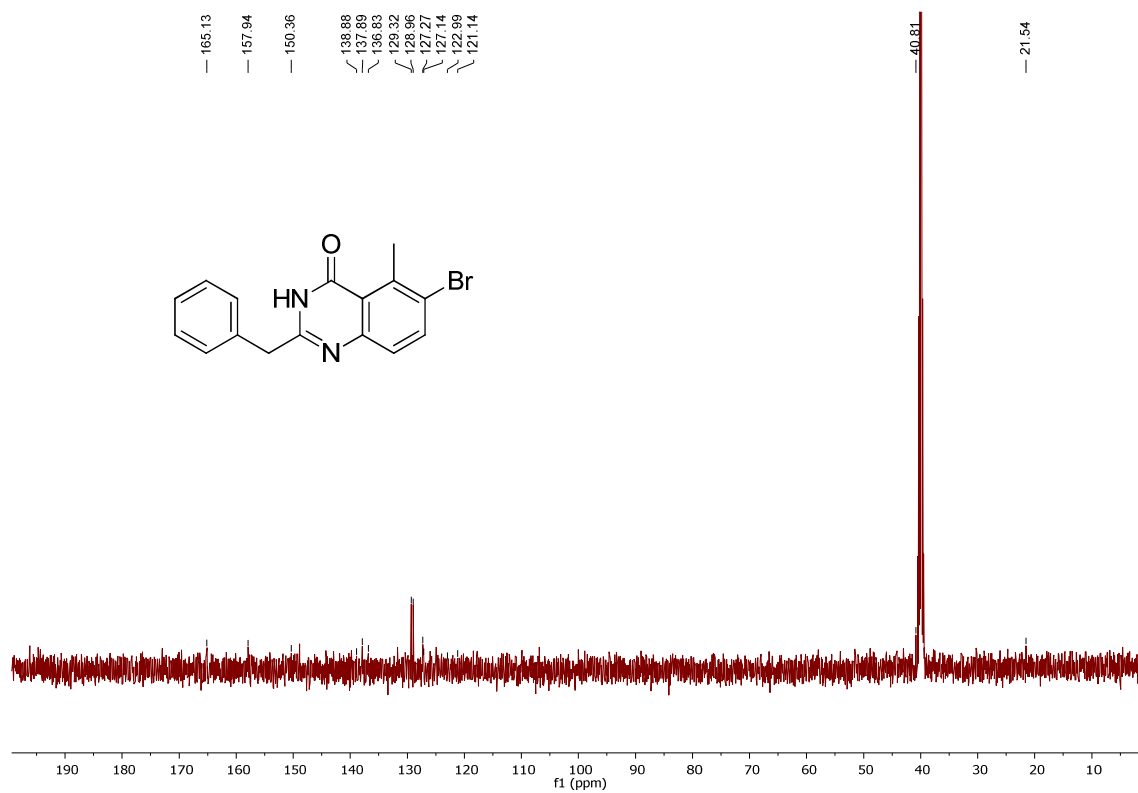

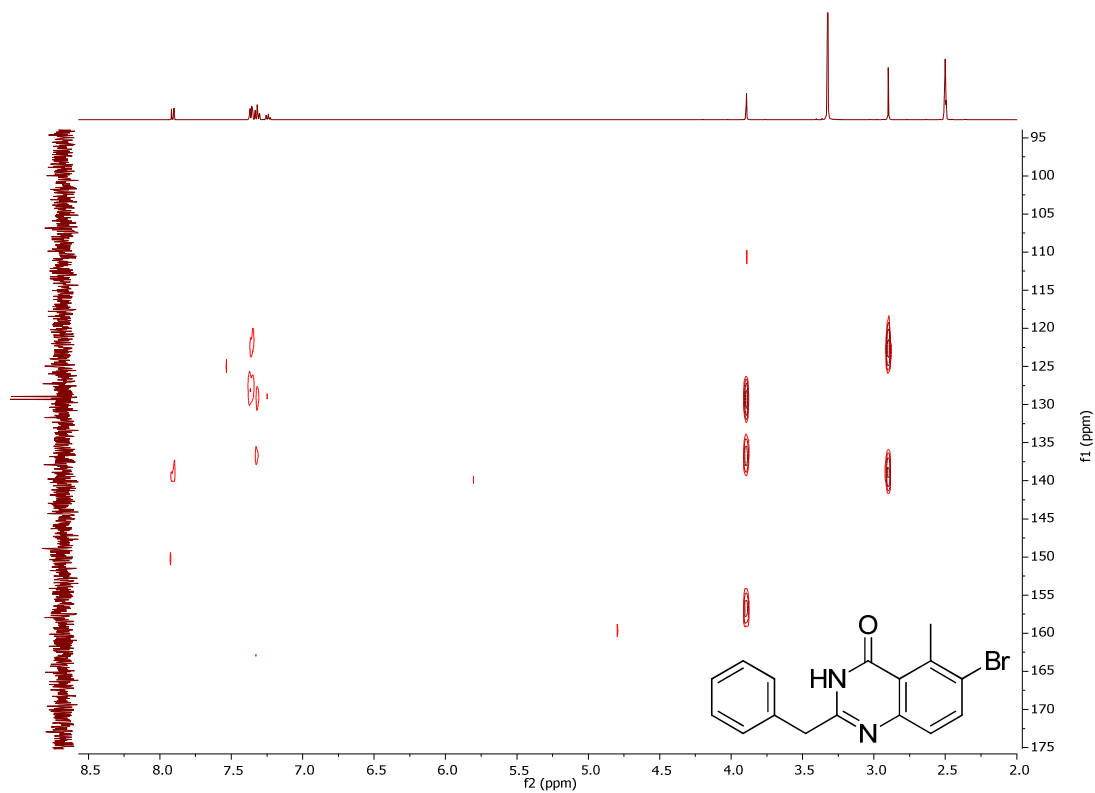

3-(4-Bromo-3-methylphenyl)-2-methylacrylic acid, 27

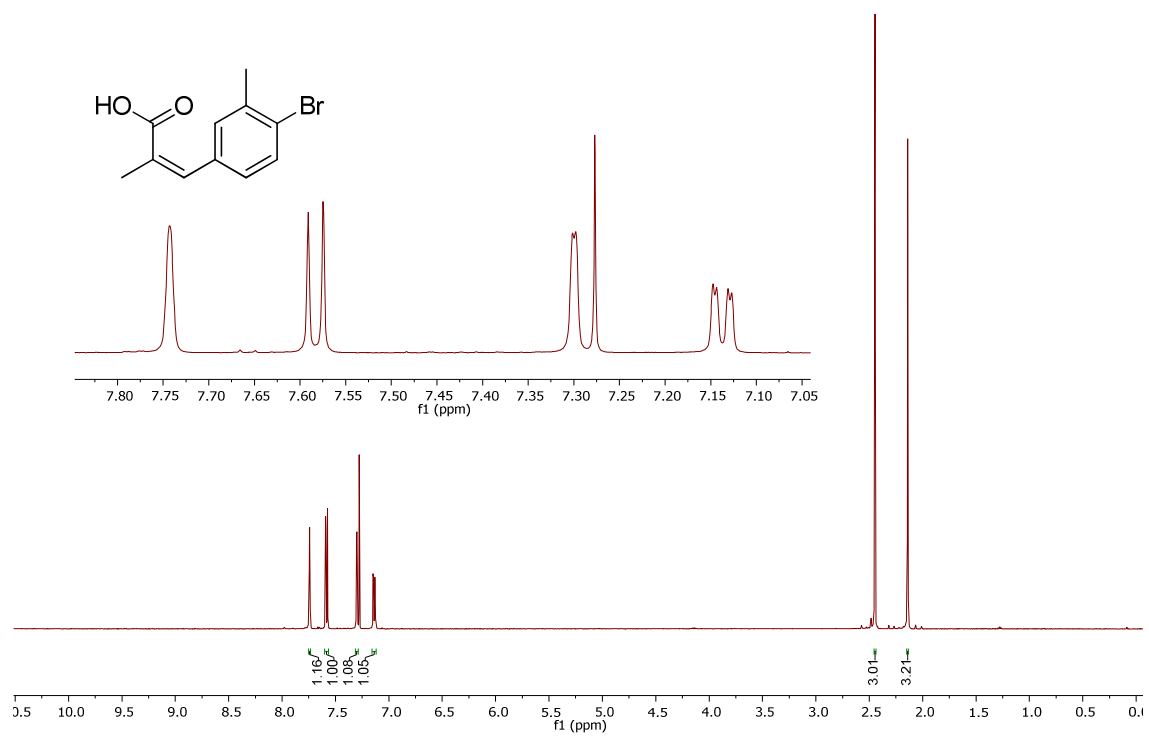

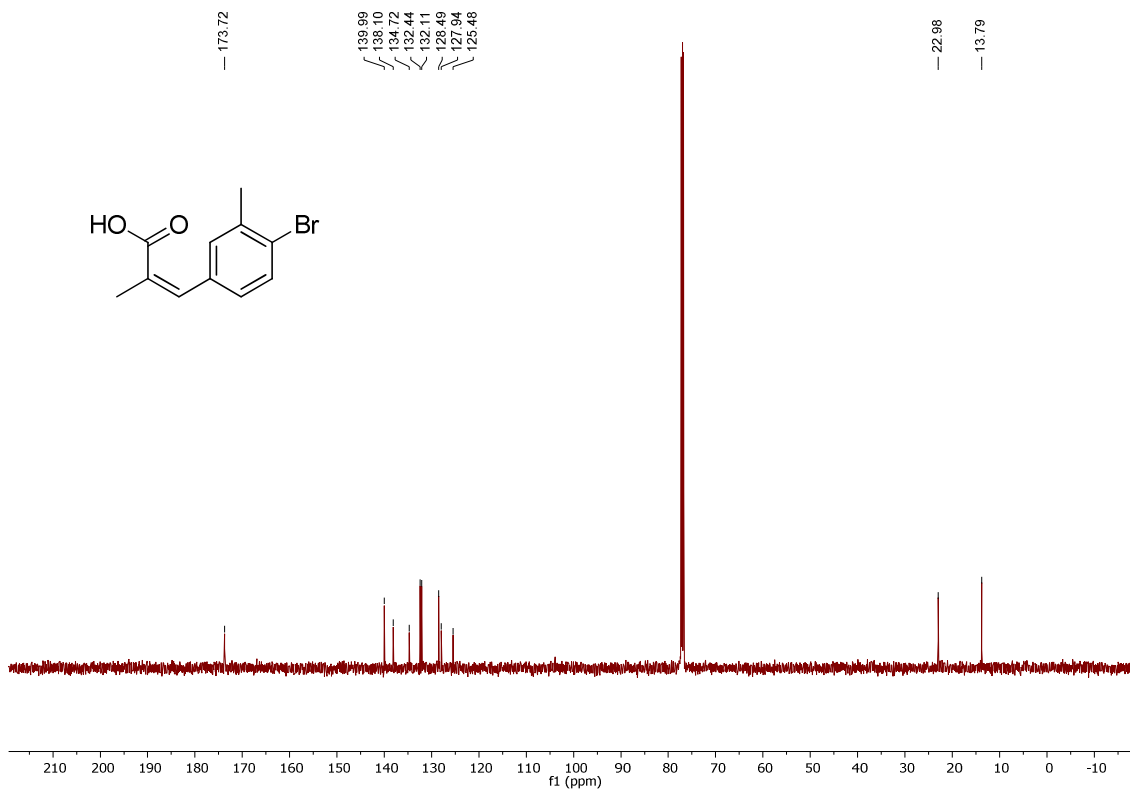

**3-(4-Bromo-3-methylphenyl)-2-methylacryloyl azide, 28**

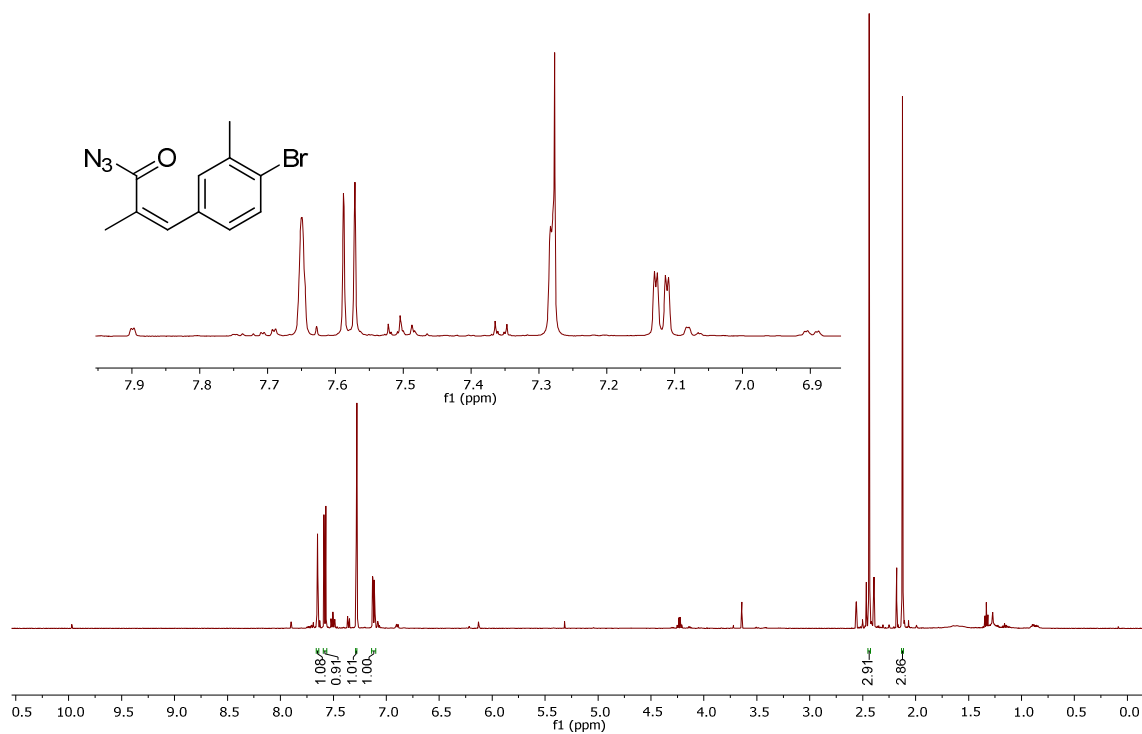

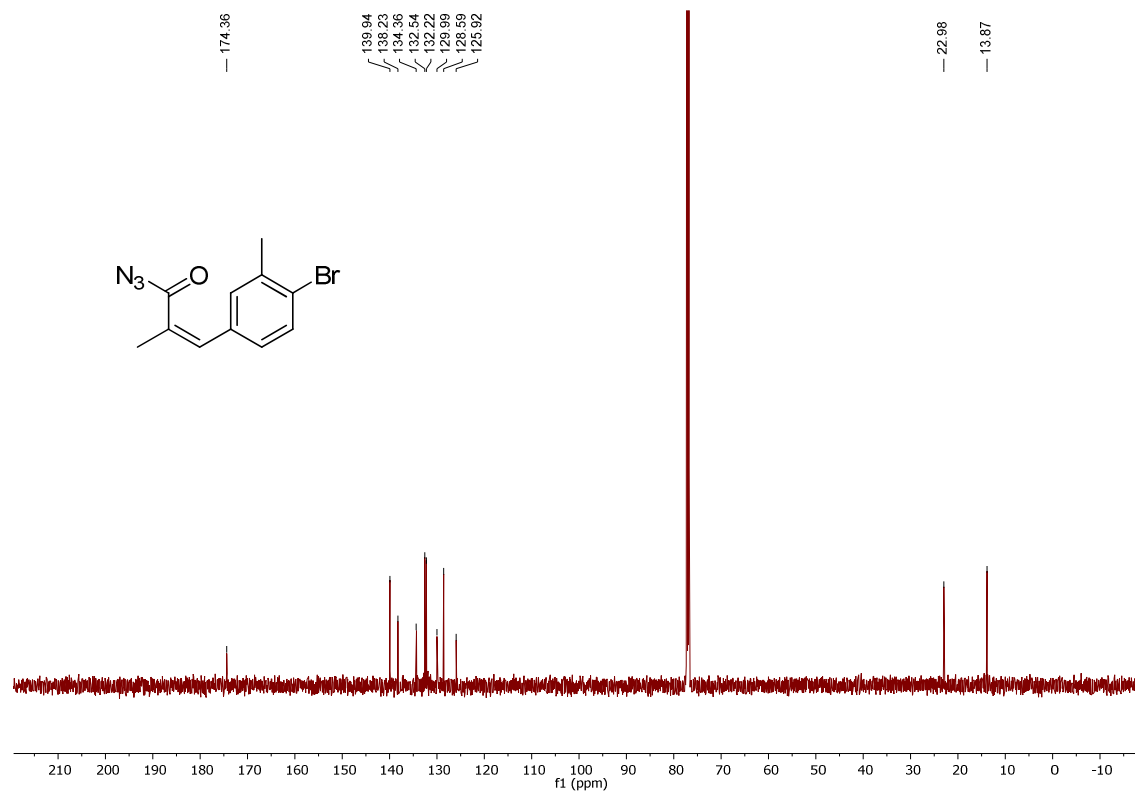

**7-Bromo-3,8-dimethyl-2H-isoquinolin-1-one, 29**

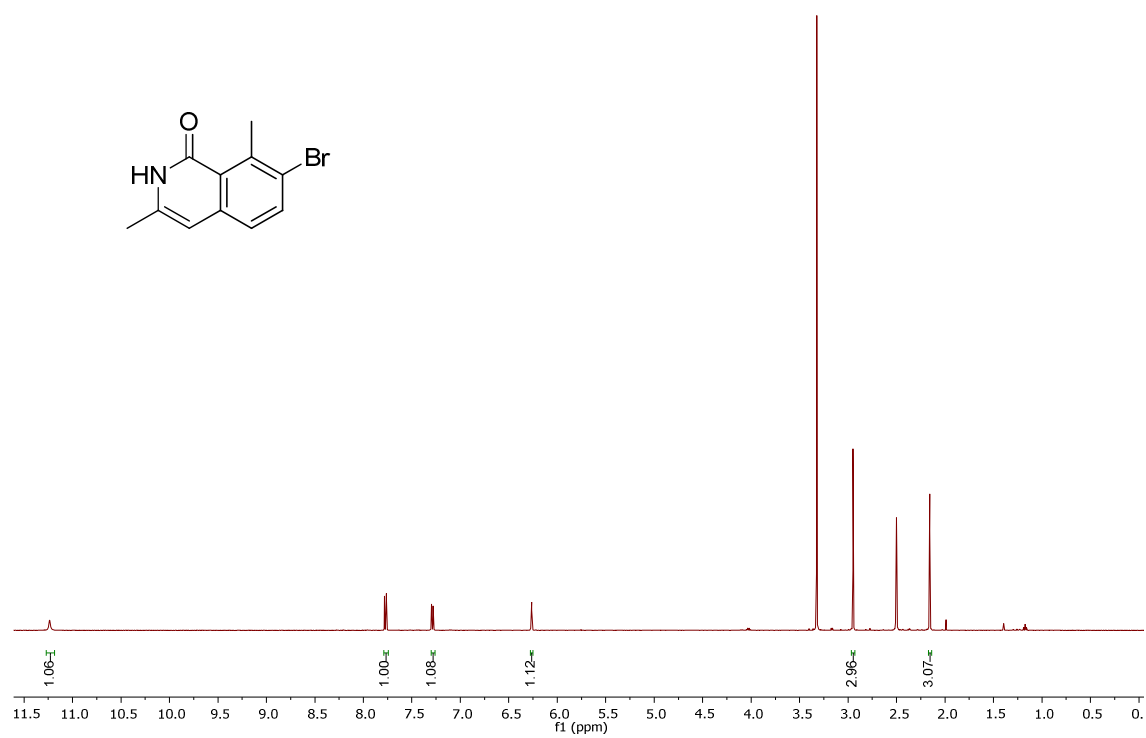

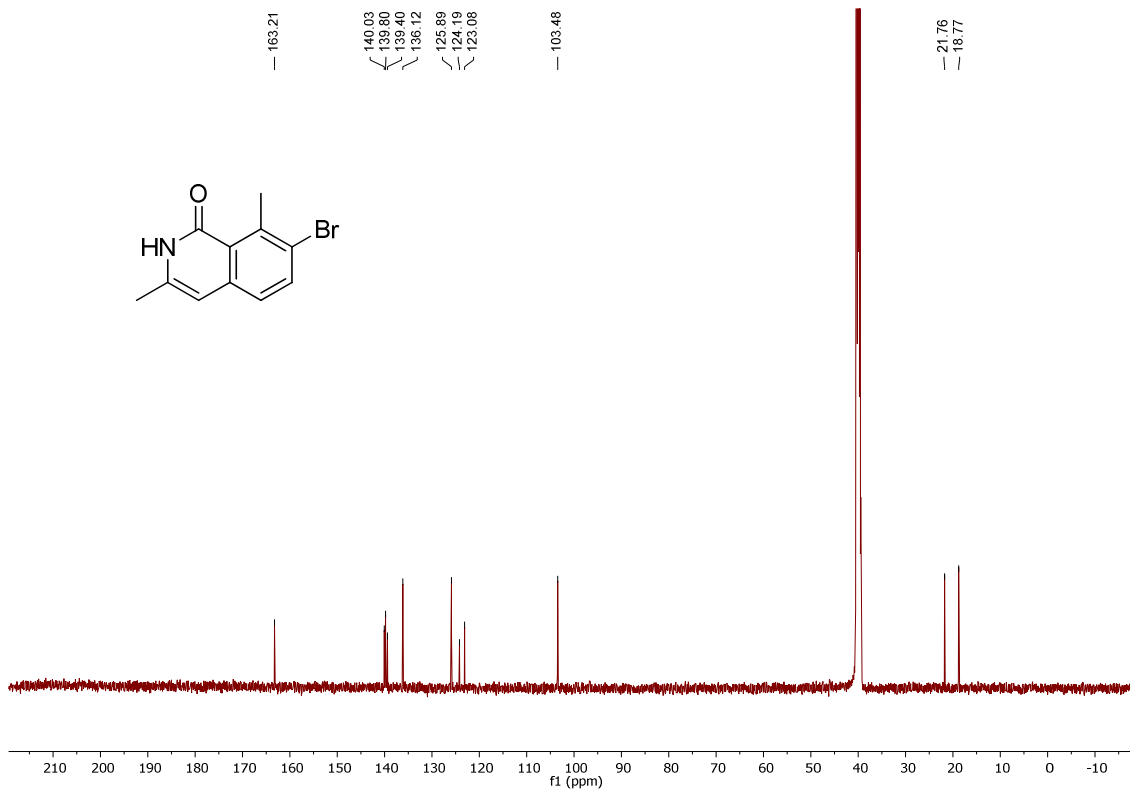

## 5. References

- 1 Sanvitale, C. E.; Kerr, G.; Chaikuad, A.; Ramel, M.-C.; Mohedas, A. H.; Reichert, S.; Wang, Y.;  
Triffitt, J. T.; Cuny, G. D.; Yu, P. B.; Hill, C. S.; Bullock, A. N. A new class of small molecule  
inhibitor of BMP signalling. *PLoS One* **2013**, *8* (4), e62721.
- 2 Battye, T. G. G.; Kontogiannis, L.; Johnson, O.; Powell, H. R.; Leslie, A. G. W. iMOSFLM: a  
new graphical interface for diffraction-image processing with MOSFLM. *Acta Crystallogr. Sect.  
D Biol. Crystallogr.* **2011**, *67* (4), 271-281.
- 3 Winn, M. D.; Ballard, C. C.; Cowtan, K. D.; Dodson, E. J.; Emsley, P.; Evans, P. R.; Keegan, R.  
M.; Krissinel, E. B.; Leslie, A. G. W.; McCoy, A.; McNicholas, S. J.; Murshudov, G. N.; Pannu,  
N. S.; Potterton, E. A.; Powell, H. R.; Read, R. J.; Vagin, A.; Wilson, K. S. Overview of the  
CCP4 suite and current developments. *Acta Crystallogr. Sect. D Biol. Crystallogr.* **2011**, *67* (4),  
235-242.
- 4 McCoy, A. J.; Grosse-Kunstleve, R. W.; Adams, P. D.; Winn, M. D.; Storoni, L. C.; Read, R. J.  
Phaser crystallographic software. *J. Appl. Crystallogr.* **2007**, *40* (4), 658-674.
- 5 Emsley, P.; Lohkamp, B.; Scott, W. G.; Cowtan, K. Features and development of Coot. *Acta  
Crystallogr. Sect. D Biol. Crystallogr.* **2010**, *66* (4), 486-501.
- 6 Murshudov, G. N.; Vagin, A. A.; Dodson, E. J. Refinement of Macromolecular Structures by the  
Maximum-Likelihood Method. *Acta Crystallogr. Sect. D Biol. Crystallogr.* **1997**, *53* (3), 240-255.
- 7 Afonine, P. V.; Grosse-Kunstleve, R. W.; Echols, N.; Headd, J. J.; Moriarty, N. W.;  
Mustyakimov, M.; Terwilliger, T. C.; Urzhumtsev, A.; Zwart, P. H.; Adams, P. D. Towards  
automated crystallographic structure refinement with phenix.refine. *Acta Crystallogr. Sect. D  
Biol. Crystallogr.* **2012**, *68* (4), 352-367.
- 8 Painter, J.; Merritt, E. A. Optimal description of a protein structure in terms of multiple groups  
undergoing TLS motion. *Acta Crystallogr. Sect. D Biol. Crystallogr.* **2006**, *62* (4), 439-450.
- 9 Davis, I. W.; Leaver-Fay, A.; Chen, V. B.; Block, J. N.; Kapral, G. J.; Wang, X.; Murray, L. W.;  
Arendall, W. B.; Snoeyink, J.; Richardson, J. S.; Richardson, D. C. MolProbity: all-atom contacts  
and structure validation for proteins and nucleic acids. *Nucleic Acids Res.* **2007**, *35* (SUPPL.2),  
375-383.
